# Supplementary material for: Additive-free coupling of bromoalkynes with secondary phosphine oxides to generate alkynylphosphine oxides in acetic anhydride
Source: Royal Society of Chemistry journal article supplement (doi:10.1039/c9ob02750e), 2020-01-01

## *Supporting Information*

### **Additive-free coupling of bromoalkynes with secondary phosphine oxides to generate alkynylphosphine oxides in acetic anhydride**

Hongjie Ruan,<sup>a</sup> Ling-Guo Meng,<sup>\*,a</sup> Hailong Xu,<sup>a</sup> Yuqing Liang,<sup>a</sup> and Lei Wang<sup>\*,a,b</sup>

<sup>a</sup> *Department of Chemistry, Huaibei Normal University, Huaibei, Anhui 235000, P. R. China*

<sup>b</sup> *State Key Laboratory of Organometallic Chemistry, Shanghai Institute of Organic Chemistry,*

*Chinese Academy of Sciences, Shanghai 200032, P. R. China*

*milig@126.com; leiwang88@hotmail.com*

### ***Table of Contents***

---

|                                                                                                 |    |
|-------------------------------------------------------------------------------------------------|----|
| 1. General remarks .....                                                                        | 2  |
| 2. General procedure for the synthesis of alkynylphosphine oxide.....                           | 2  |
| 3. The reaction of bromoalkyne, Ph <sub>2</sub> PCl and AcONa.....                              | 3  |
| 4. The reaction of bromoalkyne, HP(O)R <sup>1</sup> R <sup>2</sup> and MeCOBr .....             | 3  |
| 5. The effect of the amount of<br>acetic anhydride on the yield of <b>3aa</b> .....             | 4  |
| 6. The effect of reaction time and solvent on the yield of <b>3aa</b> .....                     | 5  |
| 7. Characterization data for all products.....                                                  | 5  |
| 8. <sup>1</sup> H NMR, <sup>13</sup> C NMR and <sup>31</sup> P NMR spectra of the products..... | 19 |

## 1. General remarks

All reactions were conducted in clean glassware with magnetic stirring. Chromatographic purification was performed on silica gel (400~500 mesh) and analytical thin layer chromatography (TLC) on silica gel 60-F<sub>254</sub> (Qindao), which was detected by fluorescence. <sup>1</sup>H NMR (400 MHz or 600 MHz), <sup>13</sup>C NMR (100 MHz or 150 MHz) and <sup>31</sup>P NMR (162 MHz or 243 MHz) spectra were measured with a Bruker AC 400 spectrometer or Bruker Avance Neo 600 spectrometer with CDCl<sub>3</sub> as solvent and recorded in ppm relative to internal tetramethylsilane standard. NMR data are reported as follows: δ, chemical shift; coupling constants (*J* are given in Hertz, Hz) and integration. Abbreviations to denote the multiplicity of a particular signal were s (singlet), d (doublet), t (triplet), q (quartet), m (multiplet), and br (broad singlet). High resolution mass spectra were obtained with a Thermo Scientific LTQ Orbitrap XL mass spectrometer. Melting points were determined on a digital melting point apparatus and temperatures were uncorrected.

## 2. General procedure for the synthesis of alkynylphosphine oxide

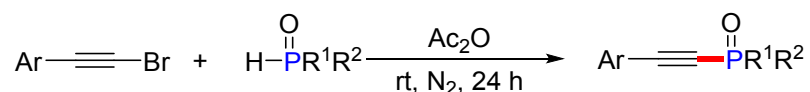

To a solution of secondary phosphine oxide (0.60 mmol) in 1.0 mL of acetic anhydride was added bromoalkyne (0.20 mmol) under nitrogen atmosphere. The reaction mixture was stirred for 24 h at room temperature. The residue was then purified by column chromatography on silica gel (petroleum ether/AcOEt 1:1) to give the pure product.

### The preparation of diphenyl(phenylethynyl)phosphine oxide (3aa) in 4.0 mmol scale

Diphenylphosphine oxide (2.43 g, 12.0 mmol) and bromoalkyne (720 mg, 4.0 mmol) were added in acetic anhydride (15 mL) under nitrogen atmosphere, and the reaction mixture was stirred room temperature for 24 h. The residue was then purified by silica gel column chromatography (petroleum ether/EtOAc = 1:1) to give pure product compound **3aa** (846 mg, 70% yield). If the reaction was accomplished in 2.0 mmol scale, the desired compound **3aa** was obtained in 83% yield.

### 3. The reaction of bromoalkyne, Ph<sub>2</sub>PCl and AcONa

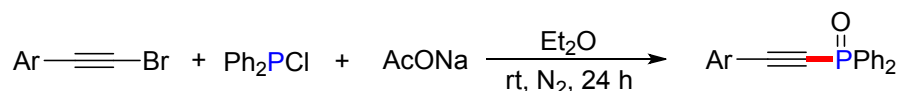

To a solution of chlorodiphenylphosphine (0.60 mmol) in 2 mL of ether was added sodium acetate (0.60 mmol) and bromoalkyne (0.20 mmol) under nitrogen atmosphere. Then the reaction mixture was stirred for 24 h at room temperature. The residue was then purified by column chromatography on silica gel (petroleum ether/AcOEt 1:1) to give the pure product.

### 4. The reaction of bromoalkyne, HP(O)R<sup>1</sup>R<sup>2</sup> and MeCOBr

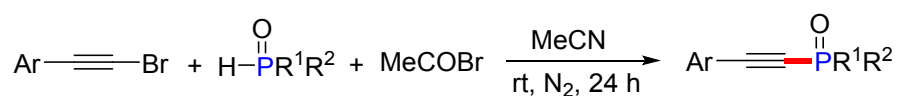

To a solution of secondary phosphine oxide (0.60 mmol) in 2 mL of acetonitrile was added bromoalkyne (0.20 mmol) and acetyl bromide (0.60 mmol) under nitrogen atmosphere. The reaction mixture was stirred for 24 h at room temperature. The residue was then purified by column chromatography on silica gel (petroleum ether/AcOEt 1:1) to give the pure product.

## 5. The effect of the amount of acetic anhydride on the yield of 3aa

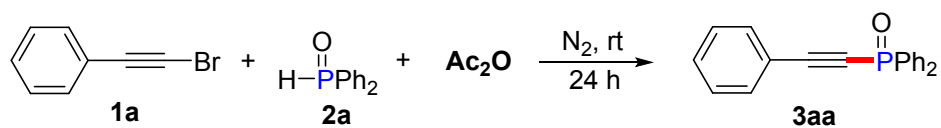

| Entry | Ac <sub>2</sub> O | Yield <sup>a</sup> (%) |
|-------|-------------------|------------------------|
| 1     | 0.10 mmol         | 10                     |
| 2     | 0.20 mmol         | 39                     |
| 3     | 0.40 mmol         | 56                     |
| 4     | 0.60 mmol         | 60                     |
| 5     | 0.80 mmol         | 68                     |
| 6     | 1.0 mmol          | 75                     |
| 7     | 1.2 mmol          | 85                     |
| 8     | 1.4 mmol          | 83                     |
| 9     | 1.6 mmol          | 86                     |
| 10    | 1.8 mmol          | 86                     |
| 11    | 2.0 mmol          | 88                     |

<sup>a</sup> Isolated yield.

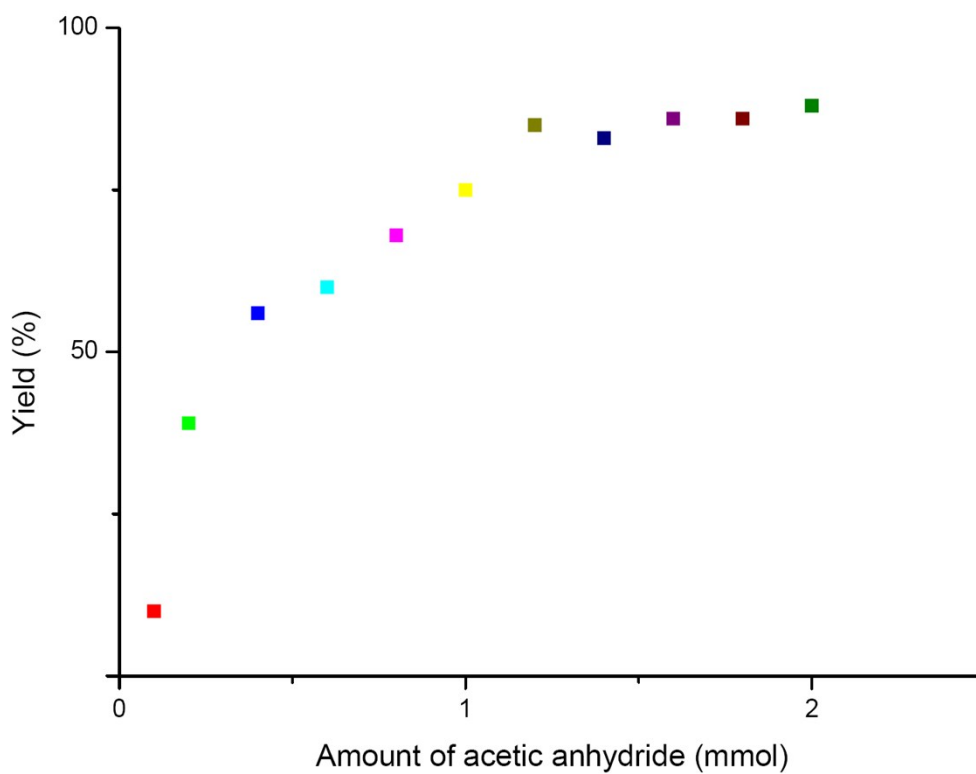

## 6. The effect of reaction time and solvent on the yield of 3aa

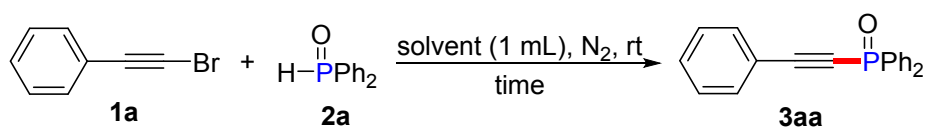

| Entry | time | solvent                         | Yield <sup>a</sup> (%) |
|-------|------|---------------------------------|------------------------|
| 1     | 1 h  | Ac <sub>2</sub> O               | 35 <sup>b</sup>        |
| 2     | 3 h  | Ac <sub>2</sub> O               | 55 <sup>b</sup>        |
| 3     | 6 h  | Ac <sub>2</sub> O               | 66 <sup>b</sup>        |
| 4     | 12 h | Ac <sub>2</sub> O               | 78 <sup>b</sup>        |
| 5     | 24 h | Ac <sub>2</sub> O               | 92 <sup>b</sup>        |
| 6     | 36 h | Ac <sub>2</sub> O               | 91 <sup>b</sup>        |
| 7     | 24 h | acetone                         | < 10 <sup>c</sup>      |
| 8     | 24 h | THF                             | 20 <sup>c</sup>        |
| 9     | 24 h | CH <sub>3</sub> CN              | 62 <sup>c</sup>        |
| 10    | 24 h | CH <sub>2</sub> Cl <sub>2</sub> | 81 <sup>c</sup>        |

<sup>a</sup> Isolated yield. <sup>b</sup> Reaction conditions: **1a** (0.20 mmol), **2a** (0.60 mmol), Ac<sub>2</sub>O (1.0 mL) at room temperature under a N<sub>2</sub> atmosphere. <sup>c</sup> Reaction conditions: **1a** (0.20 mmol), **2a** (0.60 mmol), Ac<sub>2</sub>O (0.60 mmol), solvent (1 mL) at room temperature under a N<sub>2</sub> atmosphere.

## 7. Characterization Data for All Products

### Diphenyl(phenylethynyl)phosphine oxide (**3aa**)<sup>1</sup>

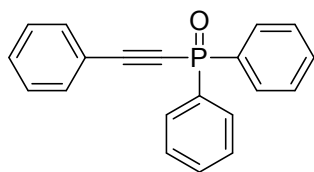

White solid (55 mg, 92% yield). Mp: 101–102 °C. <sup>1</sup>H NMR (400 MHz, CDCl<sub>3</sub>): δ 7.93–7.88 (m, 4H), 7.60–7.43 (m, 9H), 7.39–7.35 (m, 2H). <sup>13</sup>C NMR (100 MHz, CDCl<sub>3</sub>): δ 133.6 (d, *J* = 121.4 Hz), 132.5 (d, *J* = 1.7 Hz), 132.2 (d, *J* = 2.8 Hz), 131.0 (d, *J* = 11.2 Hz), 130.7, 128.7, 128.5, 119.9 (d, *J* = 3.9 Hz), 105.5 (d, *J* = 29.7 Hz), 83.7 (d, *J* = 168.7 Hz). <sup>31</sup>P NMR (162 MHz, CDCl<sub>3</sub>): δ 8.31.

**((4-Methoxyphenyl)ethynyl)diphenylphosphine oxide (3ba)<sup>2</sup>**

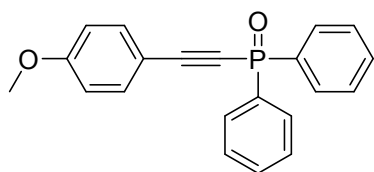

Colorless oil (60 mg, 90% yield). <sup>1</sup>H NMR (600 MHz, CDCl<sub>3</sub>): δ 7.92–7.88 (dd, *J* = 13.8, 7.8 Hz, 4H), 7.54–7.46 (m, 8H), 6.88–6.87 (d, *J* = 8.4 Hz, 2H), 3.81 (s, 3H). <sup>13</sup>C NMR (150 MHz, CDCl<sub>3</sub>): δ 161.4, 134.3, 133.7 (d, *J* = 121.4 Hz), 132.1 (d, *J* = 2.9 Hz), 131.0 (d, *J* = 11.0 Hz), 128.6 (d, *J* = 13.2 Hz), 114.2, 111.7 (d, *J* = 4.1 Hz), 106.2 (d, *J* = 30.9 Hz), 82.3 (d, *J* = 171.9 Hz), 55.4. <sup>31</sup>P NMR (243 MHz, CDCl<sub>3</sub>): δ 8.18.

**Diphenyl(p-tolyethynyl)phosphine oxide (3ca)<sup>1</sup>**

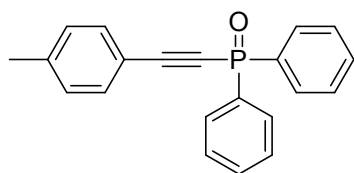

White solid (56 mg, 88% yield). Mp: 162–164 °C. <sup>1</sup>H NMR (400 MHz, CDCl<sub>3</sub>): δ 7.93–7.87 (m, 4H), 7.56–7.46 (m, 8H), 7.19–7.17 (d, *J* = 8.0 Hz, 2H), 2.37 (s, 3H). <sup>13</sup>C NMR (100 MHz, CDCl<sub>3</sub>): δ 140.3, 132.7 (d, *J* = 121.4 Hz), 131.4 (d, *J* = 1.8 Hz), 131.1 (d, *J* = 2.8 Hz), 129.9 (d, *J* = 11.1 Hz), 128.3, 127.6 (d, *J* = 13.4 Hz), 115.8 (d, *J* = 4.1 Hz), 105.1 (d, *J* = 30.3 Hz), 82.0 (d, *J* = 170.6 Hz), 20.7. <sup>31</sup>P NMR (162 MHz, CDCl<sub>3</sub>): δ 8.32.

**Diphenyl(m-tolyethynyl)phosphine oxide (3da)<sup>1</sup>**

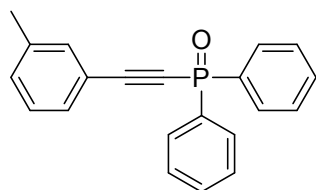

White solid (56 mg, 89% yield). Mp: 155–156 °C.  $^1\text{H}$  NMR (400 MHz,  $\text{CDCl}_3$ ):  $\delta$  7.93–7.87 (m, 4H), 7.56–7.46 (m, 6H), 7.41–7.39 (m, 2H), 7.26–7.25 (m, 2H), 2.34 (s, 3H).  $^{13}\text{C}$  NMR (100 MHz,  $\text{CDCl}_3$ ):  $\delta$  138.4, 133.7 (d,  $J = 121.3$  Hz), 132.9 (d,  $J = 1.9$  Hz), 132.2 (d,  $J = 2.8$  Hz), 131.6, 131.0 (d,  $J = 11.1$  Hz), 129.6 (d,  $J = 1.9$  Hz), 128.7 (d,  $J = 13.3$  Hz), 128.4, 119.7 (d,  $J = 4.2$  Hz), 105.9 (d,  $J = 29.9$  Hz), 83.3 (d,  $J = 169.7$  Hz), 21.1.  $^{31}\text{P}$  NMR (162 MHz,  $\text{CDCl}_3$ ):  $\delta$  8.25.

### Diphenyl((4-propylphenyl)ethynyl)phosphine oxide (3ea)

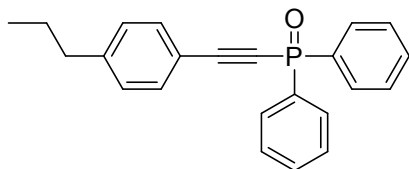

Yellow solid (59 mg, 86% yield). Mp: 100–101 °C.  $^1\text{H}$  NMR (400 MHz,  $\text{CDCl}_3$ ):  $\delta$  7.93–7.87 (m, 4H), 7.56–7.46 (m, 8H), 7.19–7.17 (d,  $J = 8.4$  Hz, 2H), 2.62–2.58 (t,  $J = 7.2$  Hz, 2H), 1.68–1.58 (m, 2H), 0.94–0.91 (t,  $J = 7.6$  Hz, 3H).  $^{13}\text{C}$  NMR (100 MHz,  $\text{CDCl}_3$ ):  $\delta$  146.0, 133.9 (d,  $J = 121.3$  Hz), 132.5 (d,  $J = 1.8$  Hz), 132.1 (d,  $J = 2.8$  Hz), 131.0 (d,  $J = 11.1$  Hz), 128.7 (d,  $J = 7.2$  Hz), 128.5, 117.1, 106.1 (d,  $J = 30.2$  Hz), 83.1 (d,  $J = 170.3$  Hz), 38.0, 24.1, 13.6.  $^{31}\text{P}$  NMR (162 MHz,  $\text{CDCl}_3$ ):  $\delta$  8.25. HRMS (ESI) calcd for  $\text{C}_{23}\text{H}_{21}\text{OP}$  ( $\text{M}+\text{H}$ ) $^+$ : 345.14028; Found: 345.14059.

### ((4-(*tert*-Butyl)phenyl)ethynyl)diphenylphosphine oxide (3fa)<sup>2</sup>

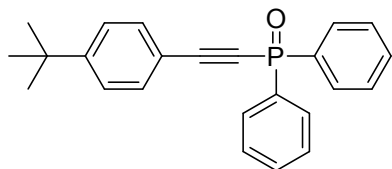

Colorless oil (55 mg, 77% yield).  $^1\text{H}$  NMR (400 MHz,  $\text{CDCl}_3$ ):  $\delta$  7.93–7.87 (dd,  $J = 14.0, 7.2$  Hz, 4H), 7.55–7.48 (m, 8H), 7.41–7.38 (d,  $J = 8.4$  Hz, 2H), 1.31 (s, 9H).  $^{13}\text{C}$  NMR (100 MHz,  $\text{CDCl}_3$ ):  $\delta$  154.4, 133.7 (d,  $J = 121.6$  Hz), 132.4 (d,  $J = 1.7$

Hz), 132.2 (d,  $J = 2.7$  Hz), 131.0 (d,  $J = 11.2$  Hz), 128.7 (d,  $J = 13.4$  Hz), 125.6, 116.8 (d,  $J = 4.0$  Hz), 106.2 (d,  $J = 30.3$  Hz), 83.0 (d,  $J = 171.0$  Hz), 35.0, 31.0.  $^{31}\text{P}$  NMR (162 MHz,  $\text{CDCl}_3$ ):  $\delta$  8.49.

**((4-Fluorophenyl)ethynyl)diphenylphosphine oxide (3ga)<sup>1</sup>**

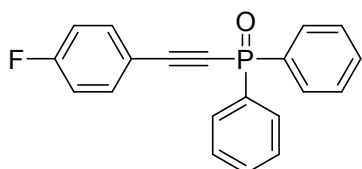

White solid (54 mg, 85% yield). Mp: 121–123 °C.  $^1\text{H}$  NMR (400 MHz,  $\text{CDCl}_3$ ):  $\delta$  7.92–7.87 (m, 4H), 7.61–7.54 (m, 4H), 7.52–7.47 (m, 4H), 7.10–7.05 (t,  $J = 8.8$  Hz, 2H).  $^{13}\text{C}$  NMR (100 MHz,  $\text{CDCl}_3$ ):  $\delta$  165.1 (d,  $J = 252.1$  Hz), 134.8 (dd,  $J = 8.8$ , 1.8 Hz), 133.5, 132.3, 132.3, 131.0 (d,  $J = 11.1$  Hz), 128.7 (d,  $J = 13.4$  Hz), 116.2 (d,  $J = 22.2$  Hz), 104.4 (d,  $J = 29.8$  Hz), 83.7 (d,  $J = 167.7$  Hz).  $^{31}\text{P}$  NMR (162 MHz,  $\text{CDCl}_3$ ):  $\delta$  8.30.

**((3-Fluorophenyl)ethynyl)diphenylphosphine oxide (3ha)<sup>3</sup>**

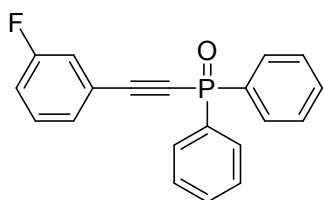

White solid (55 mg, 86% yield). Mp: 118–120 °C.  $^1\text{H}$  NMR (600 MHz,  $\text{CDCl}_3$ ):  $\delta$  7.91–7.87 (dd,  $J = 13.8$ , 7.2 Hz, 4H), 7.57–7.55 (m, 2H), 7.51–7.48 (m, 4H), 7.39–7.33 (m, 2H), 7.29–7.21 (m, 1H), 7.17–7.14 (t,  $J = 8.4$  Hz, 1H).  $^{13}\text{C}$  NMR (150 MHz,  $\text{CDCl}_3$ ):  $\delta$  163.0 (d,  $J = 246.9$  Hz), 133.1 (d,  $J = 121.5$  Hz), 132.4 (d,  $J = 2.4$  Hz), 131.0 (d,  $J = 11.1$  Hz), 130.4 (d,  $J = 8.6$  Hz), 128.7 (d,  $J = 13.4$  Hz), 128.5, 121.7 (dd,  $J = 8.9$ , 3.6 Hz), 119.3 (d,  $J = 24.2$  Hz), 118.3 (d,  $J = 21.2$  Hz), 103.6 (dd,  $J = 29.1$ , 3.0 Hz), 84.4 (d,  $J = 165.6$  Hz).  $^{31}\text{P}$  NMR (243 MHz,  $\text{CDCl}_3$ ):  $\delta$  8.34.



**((4-Chlorophenyl)ethynyl)diphenylphosphine oxide (3ia)<sup>1</sup>**

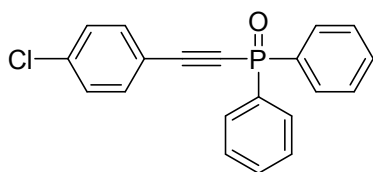

White solid (54 mg, 81% yield). Mp: 152–153 °C. <sup>1</sup>H NMR (400 MHz, CDCl<sub>3</sub>): δ 7.91–7.86 (m, 4H), 7.58–7.47 (m, 8H), 7.36–7.34 (d, *J* = 8.4 Hz, 2H). <sup>13</sup>C NMR (100 MHz, CDCl<sub>3</sub>): δ 136.0, 132.7 (d, *J* = 1.8 Hz), 132.3 (d, *J* = 121.5 Hz), 131.3 (d, *J* = 2.8 Hz), 130.0 (d, *J* = 11.2 Hz), 128.0, 127.7 (d, *J* = 13.4 Hz), 117.4 (d, *J* = 4.0 Hz), 103.1 (d, *J* = 29.4 Hz), 83.8 (d, *J* = 166.3 Hz). <sup>31</sup>P NMR (162 MHz, CDCl<sub>3</sub>): δ 8.36.

**((3-Chlorophenyl)ethynyl)diphenylphosphine oxide (3ja)<sup>1</sup>**

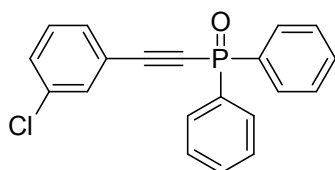

Yellow oil (50 mg, 75% yield). <sup>1</sup>H NMR (400 MHz, CDCl<sub>3</sub>): δ 7.91–7.86 (m, 4H), 7.59–7.55 (m, 3H), 7.52–7.47 (m, 5H), 7.44–7.41 (m, 1H), 7.34–7.30 (t, *J* = 7.6 Hz, 1H). <sup>13</sup>C NMR (100 MHz, CDCl<sub>3</sub>): δ 134.5, 133.3 (d, *J* = 121.4 Hz), 132.4 (d, *J* = 2.9 Hz), 132.2 (d, *J* = 2.0 Hz), 131.0 (d, *J* = 11.1 Hz), 131.0, 130.6 (d, *J* = 1.9 Hz), 129.9, 128.8 (d, *J* = 13.4 Hz), 121.6 (d, *J* = 4.0 Hz), 103.5 (d, *J* = 29.0 Hz), 85.0 (d, *J* = 165.1 Hz). <sup>31</sup>P NMR (162 MHz, CDCl<sub>3</sub>): δ 8.33.

**((4-Bromophenyl)ethynyl)diphenylphosphine oxide (3ka)<sup>1</sup>**

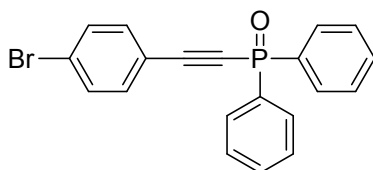

White solid (53 mg, 70% yield). Mp: 142–144 °C.  $^1\text{H}$  NMR (400 MHz,  $\text{CDCl}_3$ ):  $\delta$  7.91–7.86 (m, 4H), 7.58–7.44 (m, 10H).  $^{13}\text{C}$  NMR (100 MHz,  $\text{CDCl}_3$ ):  $\delta$ . 133.8 (d,  $J = 1.8$  Hz), 133.3 (d,  $J = 121.4$  Hz), 132.4 (d,  $J = 2.9$  Hz), 131.9, 131.0 (d,  $J = 11.2$  Hz), 128.8 (d,  $J = 13.4$  Hz), 125.5, 118.8 (d,  $J = 4.1$  Hz), 104.2 (d,  $J = 29.5$  Hz), 84.9 (d,  $J = 165.7$  Hz).  $^{31}\text{P}$  NMR (162 MHz,  $\text{CDCl}_3$ ):  $\delta$  8.42.

**((3-Bromophenyl)ethynyl)diphenylphosphine oxide (3la)<sup>4</sup>**

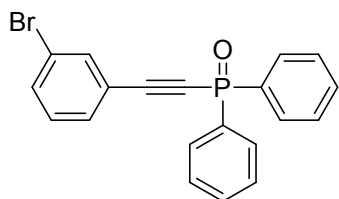

White solid (62 mg, 80% yield). Mp: 106–107 °C.  $^1\text{H}$  NMR (600 MHz,  $\text{CDCl}_3$ ):  $\delta$  7.90–7.87 (dd,  $J = 13.8, 7.2$  Hz, 4H), 7.72 (s, 1H), 7.57–7.55 (m, 3H), 7.52–7.48 (m, 5H), 7.27–7.23 (m, 1H).  $^{13}\text{C}$  NMR (150 MHz,  $\text{CDCl}_3$ ):  $\delta$  135.0 (d,  $J = 1.7$  Hz), 133.9, 133.0 (d,  $J = 121.4$  Hz), 132.4 (d,  $J = 2.4$  Hz), 131.1, 131.0 (d,  $J = 10.5$  Hz), 130.1, 128.8 (d,  $J = 13.2$  Hz), 122.3, 121.9 (d,  $J = 3.9$  Hz), 103.3 (d,  $J = 29.3$  Hz), 84.8 (d,  $J = 164.9$  Hz).  $^{31}\text{P}$  NMR (243 MHz,  $\text{CDCl}_3$ ):  $\delta$  8.31.

**Diphenyl((4-(trifluoromethyl)phenyl)ethynyl)phosphine oxide (3ma)<sup>5</sup>**

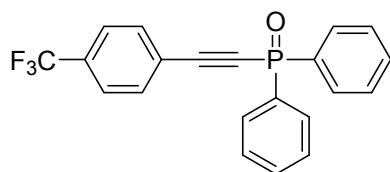

White solid (60 mg, 81% yield). Mp: 158–159 °C.  $^1\text{H}$  NMR (600 MHz,  $\text{CDCl}_3$ ):  $\delta$  7.91–7.88 (dd,  $J = 13.8, 7.2$  Hz, 4H), 7.72–7.70 (d,  $J = 7.8$  Hz, 2H), 7.65–7.64 (d,  $J = 8.4$  Hz, 2H), 7.59–7.57 (m, 2H), 7.53–7.50 (m, 4H).  $^{13}\text{C}$  NMR (150 MHz,  $\text{CDCl}_3$ ):  $\delta$  132.9 (d,  $J = 121.5$  Hz), 132.8 (d,  $J = 1.7$  Hz), 132.5 (d,  $J = 3.0$  Hz), 132.4 (d,  $J = 33.0$  Hz), 131.0 (d,  $J = 11.1$  Hz), 128.8 (d,  $J = 13.4$  Hz), 125.5 (q,  $J =$

3.5 Hz), 123.7, 122.5, 103.2 (d,  $J = 28.8$  Hz), 85.8 (d,  $J = 163.4$  Hz).  $^{31}\text{P}$  NMR (243 MHz,  $\text{CDCl}_3$ ):  $\delta$  8.40.

#### 4-((Diphenylphosphoryl)ethynyl)benzotrile (3na)<sup>2</sup>

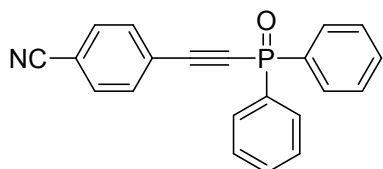

White solid (55 mg, 84% yield). Mp: 101–102 °C.  $^1\text{H}$  NMR (400 MHz,  $\text{CDCl}_3$ ):  $\delta$  7.91–7.85 (m, 4H), 7.70–7.66 (m, 4H), 7.61–7.57 (m, 2H), 7.54–7.49 (m, 4H).  $^{13}\text{C}$  NMR (100 MHz,  $\text{CDCl}_3$ ):  $\delta$  133.0 (d,  $J = 1.8$  Hz), 132.9 (d,  $J = 121.8$  Hz), 132.6 (d,  $J = 2.8$  Hz), 132.2, 131.0 (d,  $J = 11.2$  Hz), 128.8 (d,  $J = 13.5$  Hz), 124.6 (d,  $J = 3.8$  Hz), 117.7, 114.1, 102.4 (d,  $J = 28.0$  Hz), 87.8 (d,  $J = 160.6$  Hz).  $^{31}\text{P}$  NMR (162 MHz,  $\text{CDCl}_3$ ):  $\delta$  8.46.

#### ((4-Nitrophenyl)ethynyl)diphenylphosphine oxide (3oa)<sup>2</sup>

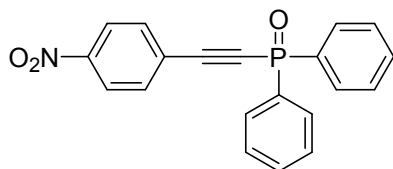

Yellow solid (44 mg, 64% yield). Mp: 165–167 °C.  $^1\text{H}$  NMR (400 MHz,  $\text{CDCl}_3$ ):  $\delta$  8.26–8.23 (d,  $J = 8.4$  Hz, 2H), 7.92–7.87 (m, 4H), 7.77–7.75 (d,  $J = 8.8$  Hz, 2H), 7.61–7.50 (m, 6H).  $^{13}\text{C}$  NMR (100 MHz,  $\text{CDCl}_3$ ):  $\delta$  148.5, 133.4 (d,  $J = 1.6$  Hz), 132.7 (d,  $J = 121.6$  Hz), 132.6 (d,  $J = 2.8$  Hz), 131.0 (d,  $J = 11.2$  Hz), 128.9 (d,  $J = 13.5$  Hz), 126.4 (d,  $J = 4.0$  Hz), 123.7, 102.1 (d,  $J = 28.1$  Hz), 88.4 (d,  $J = 159.9$  Hz).  $^{31}\text{P}$  NMR (162 MHz,  $\text{CDCl}_3$ ):  $\delta$  8.64.

#### ((2-Chlorophenyl)ethynyl)diphenylphosphine oxide (3qa)<sup>1</sup>

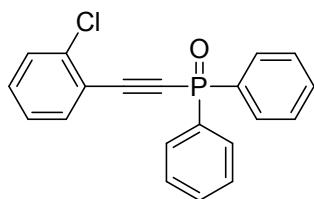

Yellow oil (54 mg, 80% yield).  $^1\text{H}$  NMR (400 MHz,  $\text{CDCl}_3$ ):  $\delta$  7.97–7.92 (m, 4H), 7.62–7.60 (dd,  $J = 7.6, 1.2$  Hz, 1H), 7.57–7.43 (m, 7H), 7.39–7.35 (td,  $J = 7.6, 1.6$  Hz, 1H), 7.29–7.25 (m, 1H).  $^{13}\text{C}$  NMR (100 MHz,  $\text{CDCl}_3$ ):  $\delta$  137.1 (d,  $J = 2.1$  Hz), 134.3 (d,  $J = 1.9$  Hz), 133.4 (d,  $J = 121.4$  Hz), 132.3 (d,  $J = 2.9$  Hz), 131.6, 131.1 (d,  $J = 10.2$  Hz), 129.5, 128.7 (d,  $J = 13.5$  Hz), 126.7, 120.3 (d,  $J = 4.0$  Hz), 101.5 (d,  $J = 29.5$  Hz), 88.6 (d,  $J = 165.6$  Hz).  $^{31}\text{P}$  NMR (162 MHz,  $\text{CDCl}_3$ ):  $\delta$  8.59.

**((2-Bromophenyl)ethynyl)diphenylphosphine oxide (3ra)**

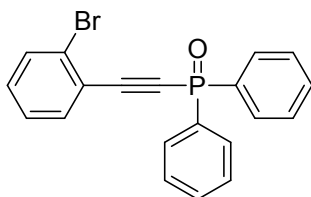

Colorless oil (55 mg, 73% yield).  $^1\text{H}$  NMR (600 MHz,  $\text{CDCl}_3$ ):  $\delta$  7.98–7.94 (dd,  $J = 13.8, 1.8$  Hz, 4H), 7.63–7.60 (m, 2H), 7.57–7.54 (m, 2H), 7.51–7.48 (m, 4H), 7.33–7.28 (m, 2H).  $^{13}\text{C}$  NMR (150 MHz,  $\text{CDCl}_3$ ):  $\delta$  134.5 (d,  $J = 1.4$  Hz), 133.2 (d,  $J = 121.7$  Hz), 132.7, 132.3 (d,  $J = 2.7$  Hz), 131.7, 131.1 (d,  $J = 11.1$  Hz), 128.7 (d,  $J = 13.5$  Hz), 127.3, 126.2 (d,  $J = 1.7$  Hz), 122.5 (d,  $J = 3.6$  Hz), 103.0 (d,  $J = 29.3$  Hz), 87.6 (d,  $J = 165.6$  Hz).  $^{31}\text{P}$  NMR (243 MHz,  $\text{CDCl}_3$ ):  $\delta$  8.58. HRMS (ESI) calcd for  $\text{C}_{20}\text{H}_{14}\text{BrOP}$  ( $\text{M}+\text{H}$ ) $^+$ : 381.00384; Found: 381.00397.

**Diphenyl(thiophen-2-ylethynyl)phosphine oxide (3sa)<sup>1</sup>**

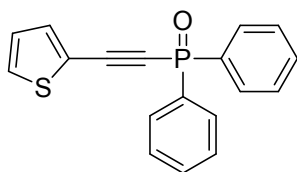

Yellow oil (41mg, 67% yield).  $^1\text{H}$  NMR (600 MHz,  $\text{CDCl}_3$ ):  $\delta$  7.91–7.86 (m, 4H), 7.56–7.54 (m, 2H), 7.50–7.46 (m, 5H), 7.43–7.42 (m, 1H), 7.04–7.02 (m, 1H).  $^{13}\text{C}$  NMR (150 MHz,  $\text{CDCl}_3$ ):  $\delta$  135.8 (d,  $J = 1.7$  Hz), 133.2 (d,  $J = 122.0$  Hz), 132.3 (d,  $J = 2.4$  Hz), 131.0 (d,  $J = 11.1$  Hz), 130.6, 128.7 (d,  $J = 13.8$  Hz), 127.4, 119.6 (d,  $J = 4.4$  Hz), 98.8 (d,  $J = 30.5$  Hz), 87.4 (d,  $J = 167.3$  Hz).  $^{31}\text{P}$  NMR (243 MHz,  $\text{CDCl}_3$ ):  $\delta$  8.39.

### Bis(4-methoxyphenyl)(phenylethynyl)phosphine oxide (3ab)

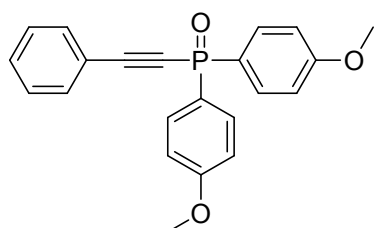

Yellow oil (50 mg, 70% yield).  $^1\text{H}$  NMR (600 MHz,  $\text{CDCl}_3$ ):  $\delta$  7.82–7.78 (dd,  $J = 13.2, 9.0$  Hz, 4H), 7.58–7.57 (d,  $J = 7.2$  Hz, 2H), 7.45–7.42 (m, 1H), 7.38–7.35 (m, 2H), 6.99–6.98 (dd,  $J = 8.4, 1.8$  Hz, 4H), 3.85 (s, 6H).  $^{13}\text{C}$  NMR (150 MHz,  $\text{CDCl}_3$ ):  $\delta$  162.7 (d,  $J = 3.0$  Hz), 132.9 (d,  $J = 12.6$  Hz), 132.4, 130.5, 128.5, 125.0 (d,  $J = 128.3$  Hz), 120.2 (d,  $J = 3.8$  Hz), 114.2 (d,  $J = 14.4$  Hz), 104.8 (d,  $J = 30.0$  Hz), 84.1 (d,  $J = 167.7$  Hz), 55.3.  $^{31}\text{P}$  NMR (243 MHz,  $\text{CDCl}_3$ ):  $\delta$  8.10. HRMS (ESI) calcd for  $\text{C}_{22}\text{H}_{19}\text{O}_3\text{P}$  ( $\text{M}+\text{H}$ ) $^+$ : 363.11446; Found: 363.11487.

### (Phenylethynyl)di-p-tolylphosphine oxide (3ac)<sup>3</sup>

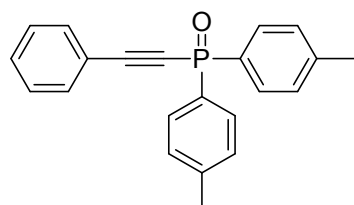

Colorless oil (52 mg, 79% yield).  $^1\text{H}$  NMR (400 MHz,  $\text{CDCl}_3$ ):  $\delta$  7.80–7.75 (dd,  $J = 13.6, 8.0$  Hz, 4H), 7.58–7.56 (m, 2H), 7.45–7.41 (m, 1H), 7.37–7.34 (m, 2H), 7.30–

7.26 (m, 4H), 2.39 (s, 6H).  $^{13}\text{C}$  NMR (100 MHz,  $\text{CDCl}_3$ ):  $\delta$  142.7 (d,  $J = 2.8$  Hz), 132.4 (d,  $J = 1.8$  Hz), 131.0 (d,  $J = 11.5$  Hz), 130.6, 130.5, 129.4 (d,  $J = 13.9$  Hz), 128.5, 120.1 (d,  $J = 4.0$  Hz), 105.0 (d,  $J = 29.6$  Hz), 84.2 (d,  $J = 168.0$  Hz), 21.6.  $^{31}\text{P}$  NMR (162 MHz,  $\text{CDCl}_3$ ):  $\delta$  8.67.

**Bis(4-fluorophenyl)(phenylethynyl)phosphine oxide (3ad)<sup>2</sup>**

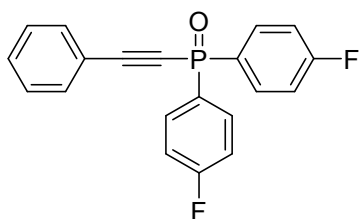

Colorless oil (49 mg, 72% yield).  $^1\text{H}$  NMR (600 MHz,  $\text{CDCl}_3$ ):  $\delta$  7.92–7.86 (m, 4H), 7.60–7.59 (m, 2H), 7.49–7.46 (m, 1H), 7.40–7.38 (m, 2H), 7.21–7.17 (m, 4H).  $^{13}\text{C}$  NMR (150 MHz,  $\text{CDCl}_3$ ):  $\delta$  166.2 (dd,  $J = 252.5, 3.2$  Hz), 133.5 (dd,  $J = 12.9, 8.7$  Hz), 132.5 (d,  $J = 1.8$  Hz), 130.9, 129.3 (dd,  $J = 125.6, 3.2$  Hz), 128.6, 119.6 (d,  $J = 4.1$  Hz), 116.3 (dd,  $J = 21.6, 15.0$  Hz), 106.1 (d,  $J = 30.8$  Hz), 82.9 (d,  $J = 171.9$  Hz).  $^{31}\text{P}$  NMR (243 MHz,  $\text{CDCl}_3$ ):  $\delta$  6.19.

**Bis(4-chlorophenyl)(phenylethynyl)phosphine oxide (3ae)<sup>1</sup>**

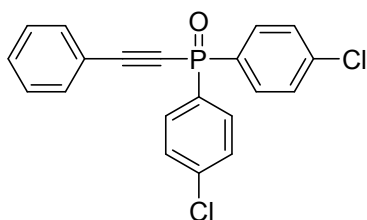

Yellow oil (59 mg, 80% yield).  $^1\text{H}$  NMR (600 MHz,  $\text{CDCl}_3$ ):  $\delta$  7.83–7.80 (dd,  $J = 13.2$  Hz, 8.4 Hz, 4H), 7.60–7.59 (d,  $J = 7.2$  Hz, 2H), 7.49–7.46 (m, 5H), 7.40–7.38 (t,  $J = 7.2$  Hz, 2H).  $^{13}\text{C}$  NMR (150 MHz,  $\text{CDCl}_3$ ):  $\delta$  139.1 (d,  $J = 3.5$  Hz), 132.6, 132.3 (d,  $J = 12.2$  Hz), 131.6 (d,  $J = 123.8$  Hz), 131.0, 129.2 (d,  $J = 14.1$  Hz), 128.6, 119.4 (d,  $J = 3.9$  Hz), 106.4 (d,  $J = 30.8$  Hz), 82.6 (d,  $J = 173.3$  Hz).  $^{31}\text{P}$  NMR (243

MHz, CDCl<sub>3</sub>): δ 6.14.

**Bis(3-methoxyphenyl)(phenylethynyl)phosphine oxide (3af)**

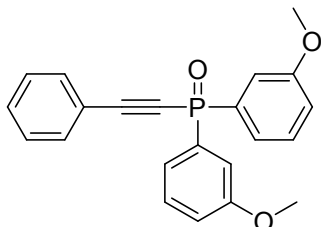

Colorless oil (44 mg, 61% yield). <sup>1</sup>H NMR (400 MHz, CDCl<sub>3</sub>): δ 7.60–7.58 (m, 2H), 7.47–7.35 (m, 9H), 7.09–7.06 (m, 2H), 3.83 (s, 6H). <sup>13</sup>C NMR (100 MHz, CDCl<sub>3</sub>): δ 159.7 (d, *J* = 16.7 Hz), 134.8 (d, *J* = 120.9 Hz), 132.5 (d, *J* = 1.9 Hz), 130.7, 130.0 (d, *J* = 15.9 Hz), 128.5, 123.2 (d, *J* = 11.1 Hz), 119.9 (d, *J* = 4.0 Hz), 118.5 (d, *J* = 2.8 Hz), 115.7 (d, *J* = 12.3 Hz), 105.5 (d, *J* = 30.1 Hz), 83.6 (d, *J* = 170.0 Hz), 55.4. <sup>31</sup>P NMR (162 MHz, CDCl<sub>3</sub>): δ 8.38. HRMS (ESI) calcd for C<sub>22</sub>H<sub>19</sub>O<sub>3</sub>P (M+H)<sup>+</sup>: 363.11446; Found: 363.11401.

**(Phenylethynyl)di-*m*-tolylphosphine oxide (3ag)**

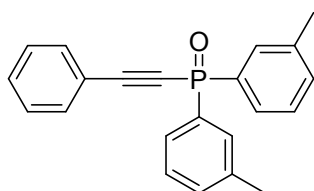

Colorless oil (45 mg, 69% yield). <sup>1</sup>H NMR (600 MHz, CDCl<sub>3</sub>): δ 7.74–7.72 (d, *J* = 12 Hz, 2H), 7.69–7.65 (dd, *J* = 13.8, 7.2 Hz, 2H), 7.60–7.59 (m, 2H), 7.46–7.43 (m, 1H), 7.39–7.34 (m, 6H), 2.39 (s, 6H). <sup>13</sup>C NMR (150 MHz, CDCl<sub>3</sub>): δ 138.6 (d, *J* = 13.4 Hz), 133.3, 133.0 (d, *J* = 3.0 Hz), 132.5 (d, *J* = 1.8 Hz), 131.4 (d, *J* = 10.9 Hz), 130.6, 128.5, 128.4, 128.1 (d, *J* = 11.7 Hz), 120.1 (d, *J* = 3.6 Hz), 105.2 (d, *J* = 29.4 Hz), 83.7 (d, *J* = 167.7 Hz), 21.4. <sup>31</sup>P NMR (243 MHz, CDCl<sub>3</sub>): δ 8.69. HRMS (ESI) calcd for C<sub>22</sub>H<sub>19</sub>OP (M+H)<sup>+</sup>: 331.12463; Found: 331.12497.

### Bis(3-fluorophenyl)(phenylethynyl)phosphine oxide (3ah)

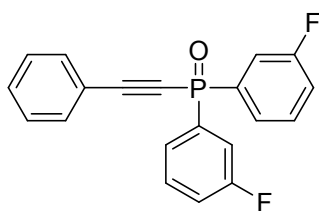

Colorless oil (41 mg, 60% yield).  $^1\text{H}$  NMR (400 MHz,  $\text{CDCl}_3$ ):  $\delta$  7.72–7.66 (dd,  $J = 13.6, 7.6$  Hz, 2H), 7.63–7.56 (m, 4H), 7.54–7.47 (m, 3H), 7.42–7.39 (t,  $J = 7.6, 2\text{H}$ ), 7.29–7.25 (t,  $J = 9.6$  Hz, 2H).  $^{13}\text{C}$  NMR (100 MHz,  $\text{CDCl}_3$ ):  $\delta$  163.9 (dd,  $J = 249.3, 19.0$  Hz), 135.8 (dd,  $J = 121.9, 5.8$  Hz), 132.6 (d,  $J = 1.8$  Hz), 131.1, 130.9 (dd,  $J = 15.8, 7.5$  Hz), 128.7, 126.7 (dd,  $J = 10.5, 3.3$  Hz), 119.8 (dd,  $J = 21.2, 2.6$  Hz), 119.4 (d,  $J = 4.1$  Hz), 118.0 (dd,  $J = 22.6, 12.3$  Hz), 106.6 (d,  $J = 31.2$  Hz), 82.5 (d,  $J = 174.6$  Hz).  $^{31}\text{P}$  NMR (162 MHz,  $\text{CDCl}_3$ ):  $\delta$  5.32. HRMS (ESI) calcd for  $\text{C}_{20}\text{H}_{13}\text{F}_2\text{OP}$  ( $\text{M}+\text{H}$ ) $^+$ : 339.07448; Found: 339.07477.

### Bis(3,5-dimethylphenyl)(phenylethynyl)phosphine oxide (3ai)<sup>3</sup>

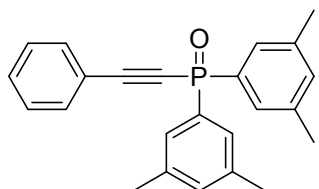

Colorless oil (54 mg, 76% yield).  $^1\text{H}$  NMR (400 MHz,  $\text{CDCl}_3$ ):  $\delta$  7.61–7.58 (m, 2H), 7.52–7.48 (d,  $J = 14.0$  Hz, 4H), 7.46–7.42 (m, 1H), 7.39–7.35 (m, 2H), 7.16 (s, 2H), 2.35 (s, 12H).  $^{13}\text{C}$  NMR (100 MHz,  $\text{CDCl}_3$ ):  $\delta$  138.4 (d,  $J = 14.0$  Hz), 133.9 (d,  $J = 2.9$  Hz), 133.4 (d,  $J = 199.9$  Hz), 132.5 (d,  $J = 1.8$  Hz), 130.5, 128.5 (d,  $J = 2.7$  Hz), 128.4, 120.2, 104.9 (d,  $J = 29.4$  Hz), 84.2 (d,  $J = 168.4$  Hz), 21.3.  $^{31}\text{P}$  NMR (162 MHz,  $\text{CDCl}_3$ ):  $\delta$  9.12.

### Ethyl(phenyl)(phenylethynyl)phosphine oxide (3aj)



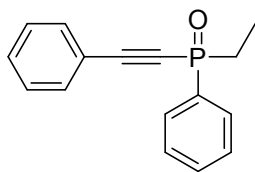

Colorless oil (32 mg, 64% yield).  $^1\text{H}$  NMR (600 MHz,  $\text{CDCl}_3$ ):  $\delta$  7.93–7.89 (m, 2H), 7.58–7.57 (m, 3H), 7.54–7.51 (m, 2H), 7.46–7.43 (m, 1H), 7.39–7.36 (m, 2H), 2.18–2.12 (m, 2H), 1.28–1.22 (m, 3H).  $^{13}\text{C}$  NMR (150 MHz,  $\text{CDCl}_3$ ):  $\delta$  132.5, 132.2 (d,  $J = 2.4$  Hz), 132.1 (d,  $J = 114.5$  Hz), 130.5 (d,  $J = 6.5$  Hz), 130.4, 128.7 (d,  $J = 12.5$  Hz), 128.5, 120.0 (d,  $J = 4.1$  Hz), 104.0 (d,  $J = 27.3$  Hz), 82.9 (d,  $J = 156.3$  Hz), 27.2 (d,  $J = 84.5$  Hz), 6.0 (d,  $J = 5.1$  Hz).  $^{31}\text{P}$  NMR (243 MHz,  $\text{CDCl}_3$ ):  $\delta$  19.18. HRMS (ESI) calcd for  $\text{C}_{16}\text{H}_{15}\text{OP}$  ( $\text{M}+\text{H}$ ) $^+$ : 255.09333; Found: 255.09349.

### Heptyl(phenyl)(phenylethynyl)phosphine oxide (3ak)

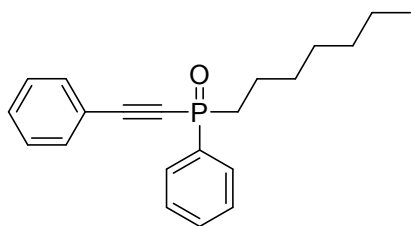

Colorless oil (50 mg, 77% yield).  $^1\text{H}$  NMR (600 MHz,  $\text{CDCl}_3$ ):  $\delta$  7.92–7.89 (dd,  $J = 13.2, 7.2$  Hz, 2H), 7.57–7.56 (m, 3H), 7.53–7.50 (m, 2H), 7.47–7.43 (m, 1H), 7.39–7.36 (m, 2H), 2.16–2.10 (m, 2H), 1.71–1.67 (m, 2H), 1.43–1.38 (m, 2H), 1.30–1.23 (m, 6H), 0.86–0.84 (m, 3H).  $^{13}\text{C}$  NMR (150 MHz,  $\text{CDCl}_3$ ):  $\delta$  132.6 (d,  $J = 114.6$  Hz), 132.4, 132.1 (d,  $J = 2.3$  Hz), 130.5 (d,  $J = 10.7$  Hz), 130.4, 128.7 (d,  $J = 12.8$  Hz), 128.5, 120.0 (d,  $J = 3.9$  Hz), 103.8 (d,  $J = 27.3$  Hz), 83.3 (d,  $J = 156.2$  Hz), 34.1 (d,  $J = 83.4$  Hz), 31.5, 30.6 (d,  $J = 15.9$  Hz), 28.7, 22.5, 21.8 (d,  $J = 4.1$  Hz), 14.0.  $^{31}\text{P}$  NMR (243 MHz,  $\text{CDCl}_3$ ):  $\delta$  17.12. HRMS (ESI) calcd for  $\text{C}_{21}\text{H}_{25}\text{OP}$  ( $\text{M}+\text{H}$ ) $^+$ : 325.17158; Found: 325.17163.

**Reference:**

1. T. Wang, S. Chen, A. Shao, M. Gao, Y. Huang, and A. Lei, *Org. Lett.*, 2015, **17**, 118.
2. J.-Q. Zhang, T. Chen, J.-S. Zhang, and L.-B. Han, *Org. Lett.*, 2017, **19**, 4692.
3. H.-M. Guo, Q.-Q. Zhou, X. Jiang, D.-Q. Shi, and W.-J. Xiao, *Adv. Synth. Catal.*, 2017, **359**, 4141.
4. L. Peng, F. Xu, Y. Suzuma, A. Orita, and J. Otera, *J. Org. Chem.*, 2013, **78**, 12802.
5. J. Yang, T. Chen, Y. Zhou, S. Yin, and L.-B. Han, *Chem. Commun.*, 2015, **51**, 3549.

## 8. $^1\text{H}$ NMR, $^{13}\text{C}$ NMR and $^{31}\text{P}$ NMR spectra of the products

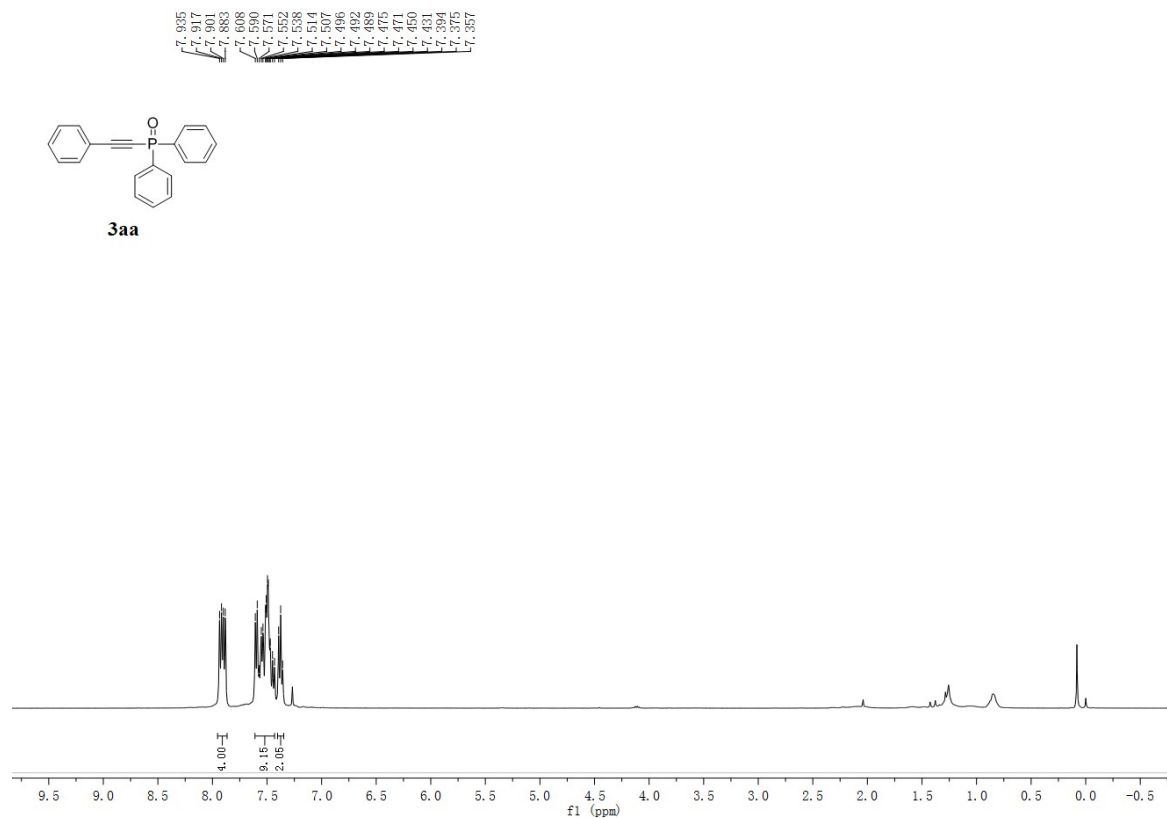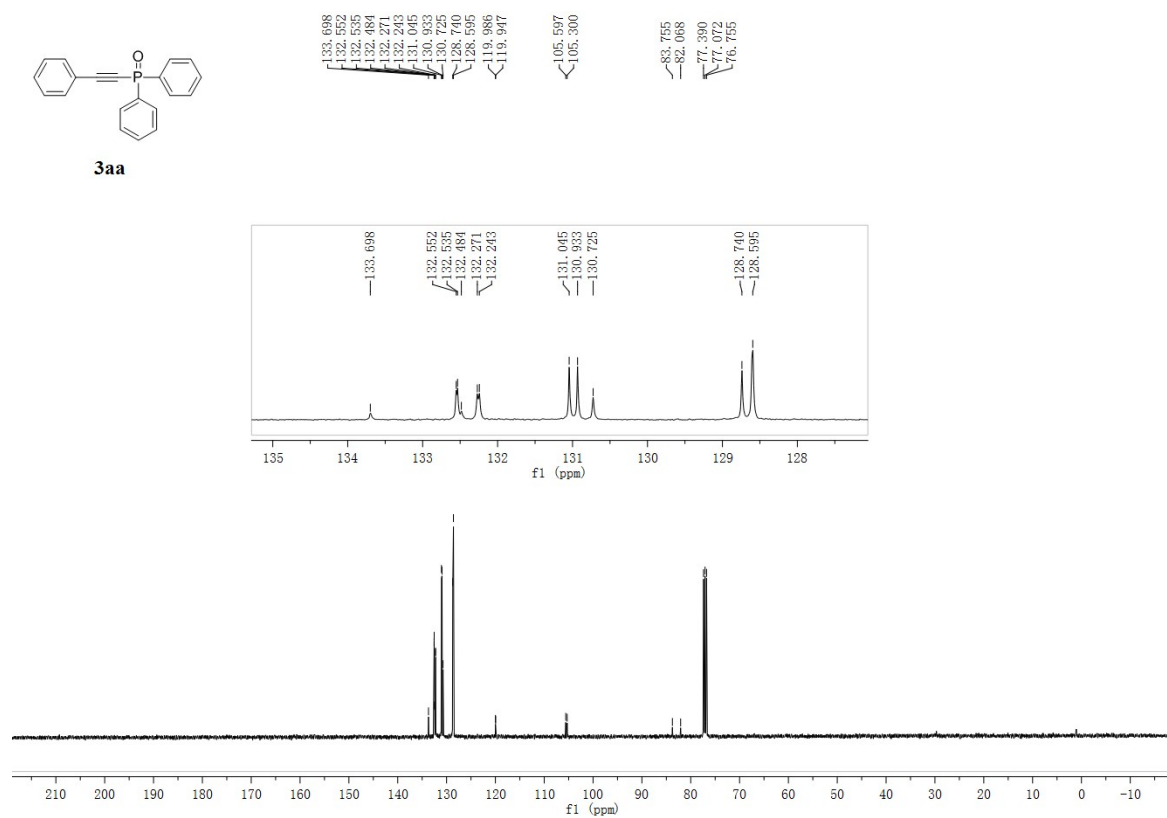

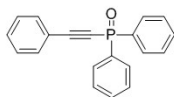

**3aa**

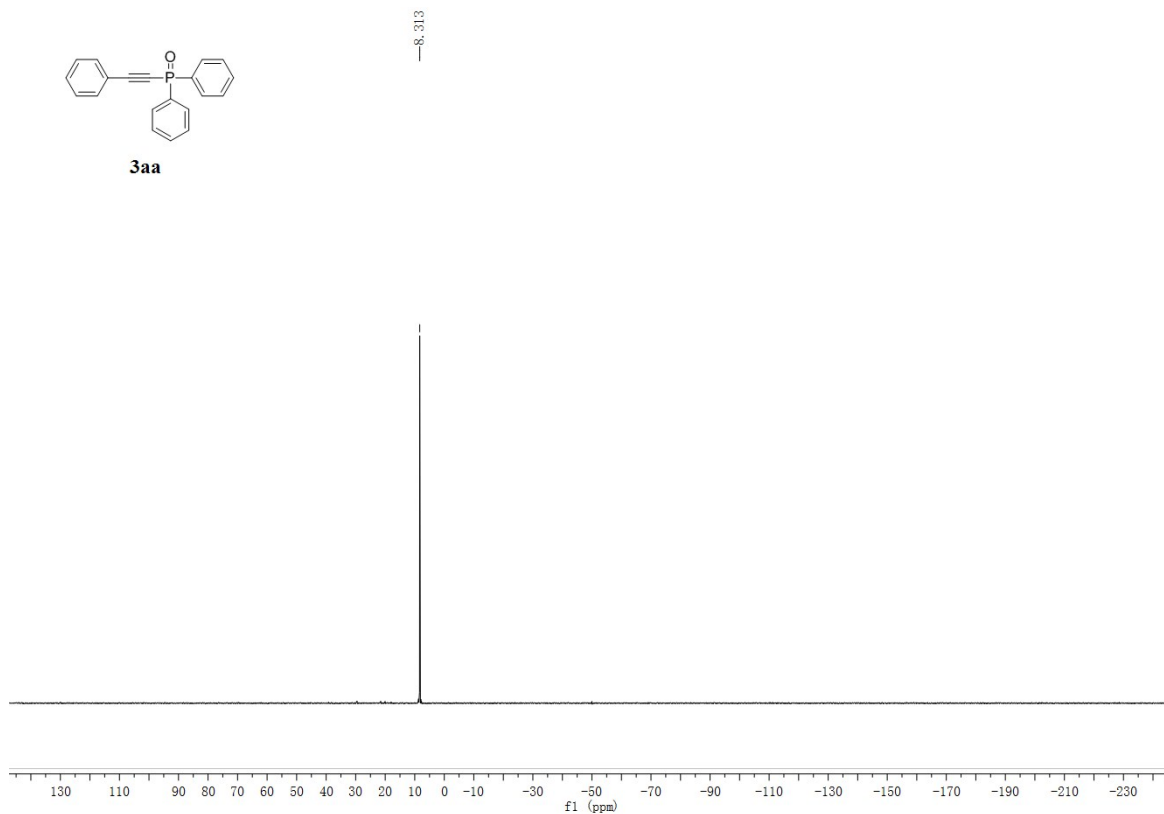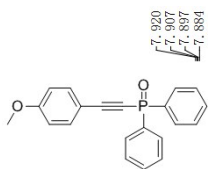

**3ba**

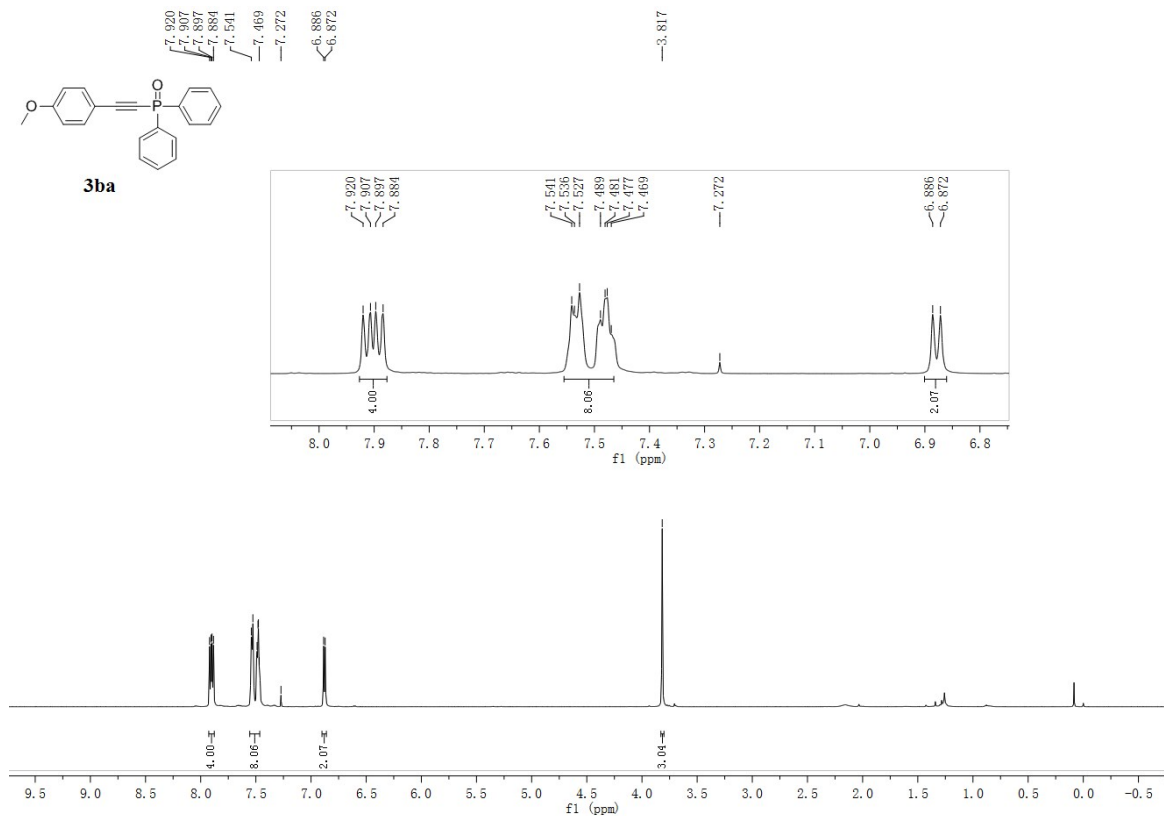

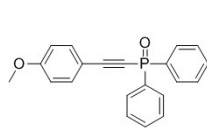

**3ba**

161.490  
 134.335  
 133.756  
 132.947  
 132.157  
 132.138  
 130.938  
 128.672  
 128.584  
 114.284  
 111.798  
 111.771  
 106.299  
 106.093  
 82.301  
 81.155  
 77.316  
 77.105  
 76.892  
 55.431

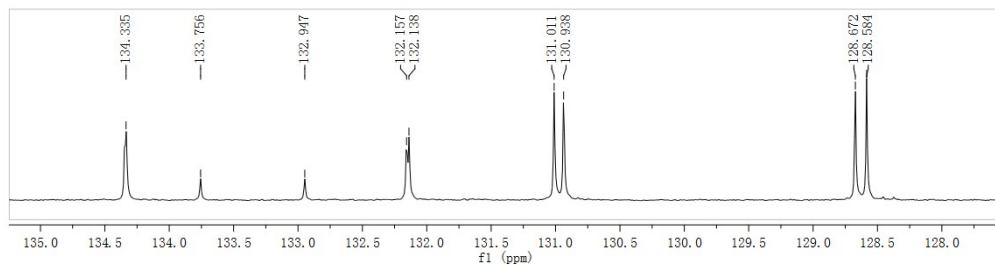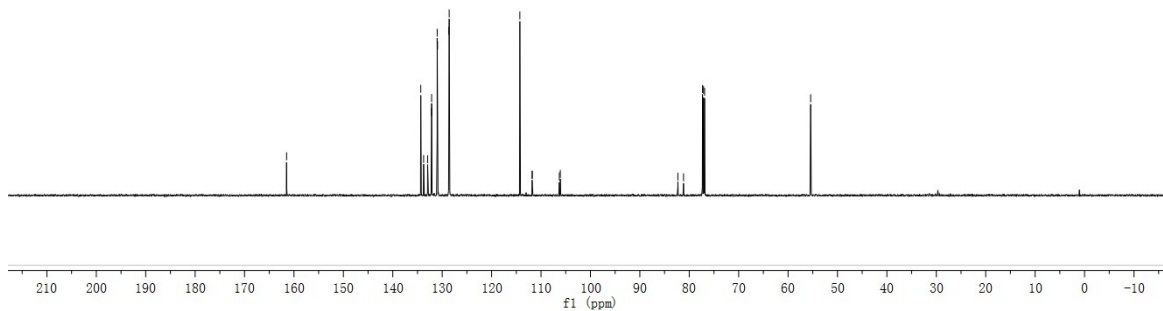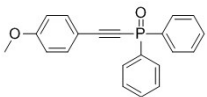

**3ba**

8.181

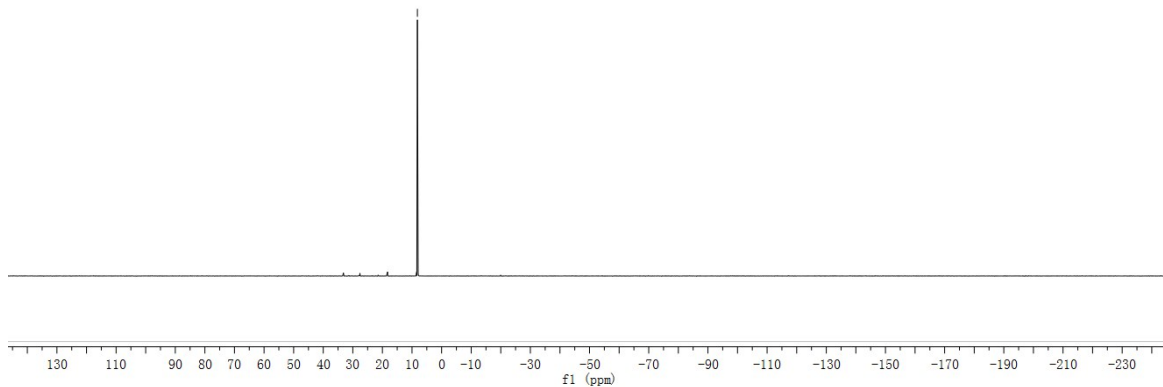



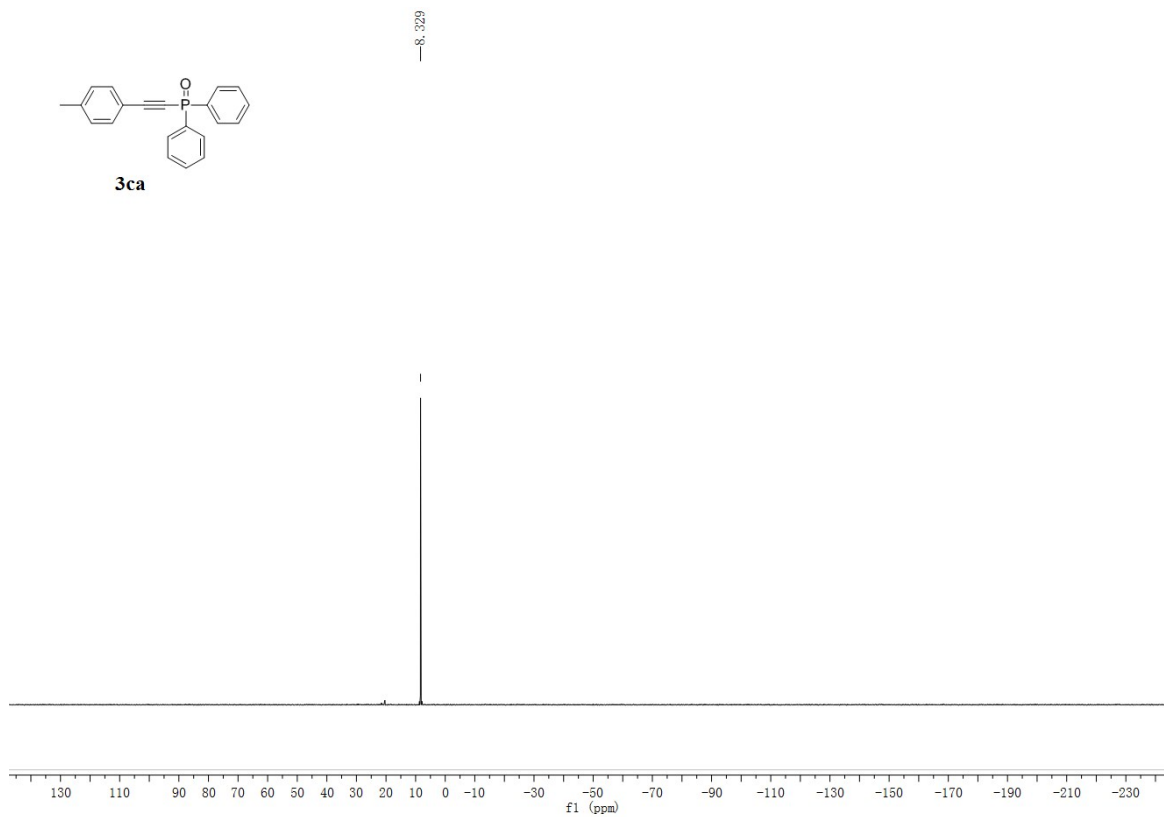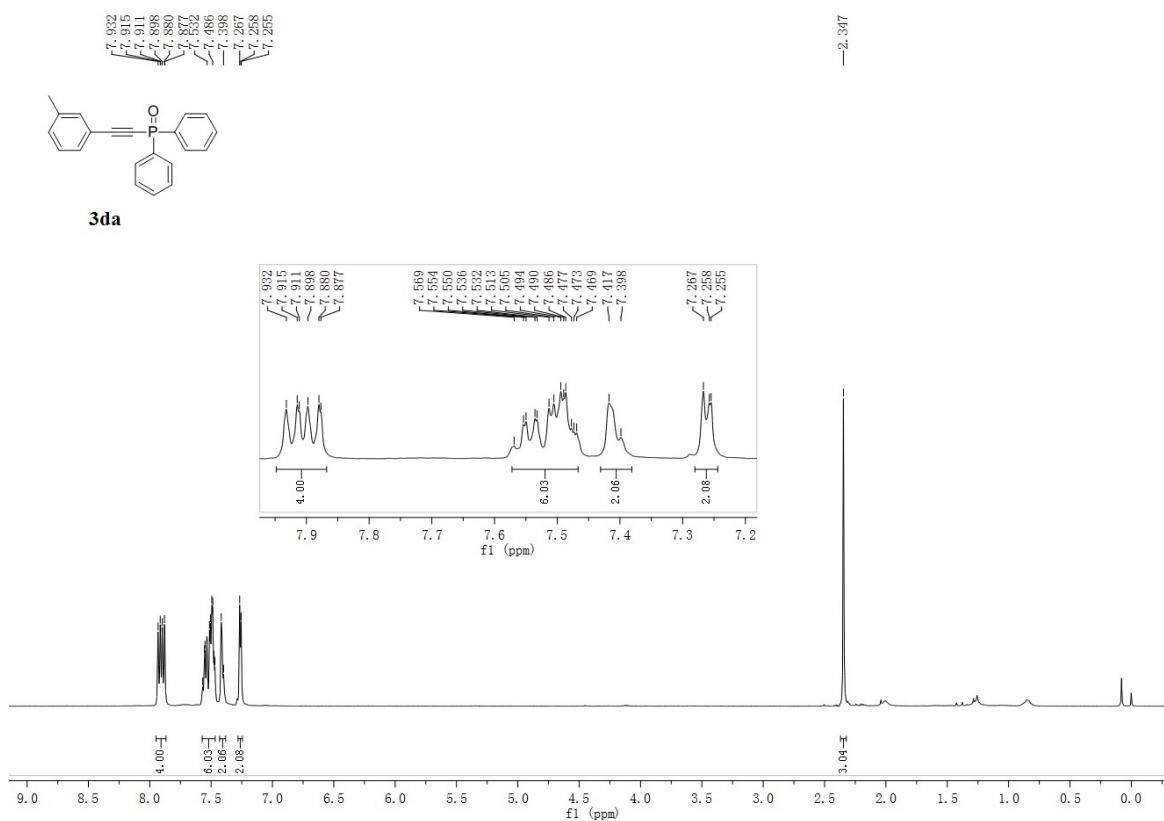

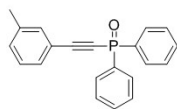

**3da**

138.441  
132.226  
131.043  
129.679  
128.494  
119.786  
119.744  
105.953  
105.654  
83.353  
81.656  
77.382  
77.085  
76.747  
21.174

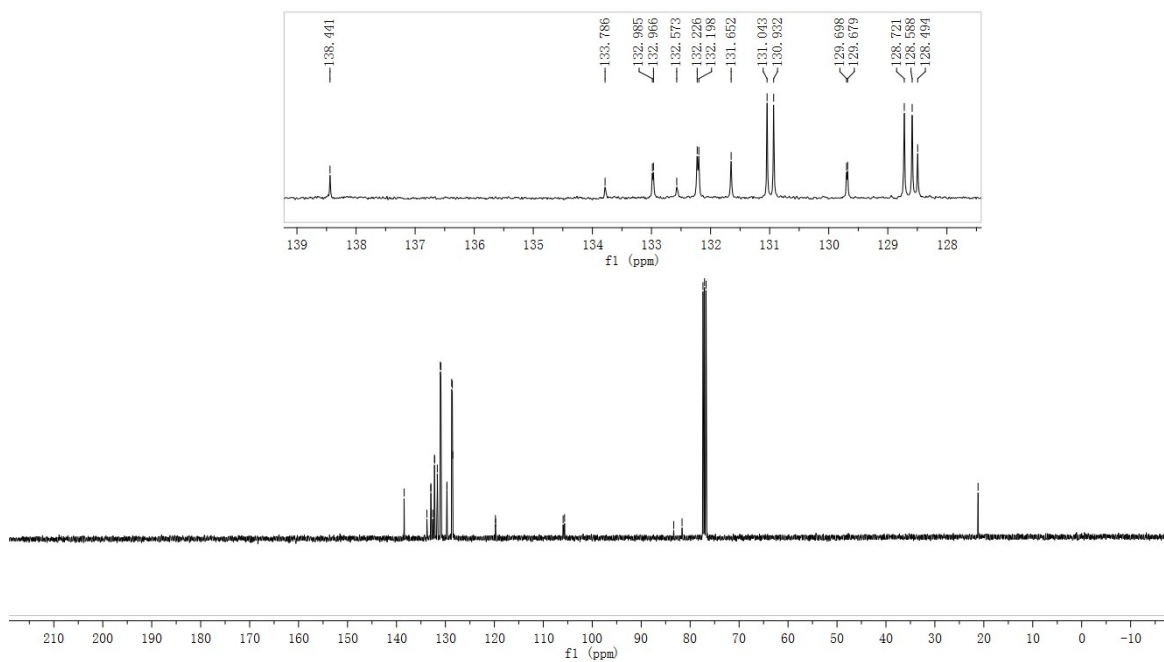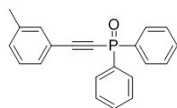

**3da**

-8.257

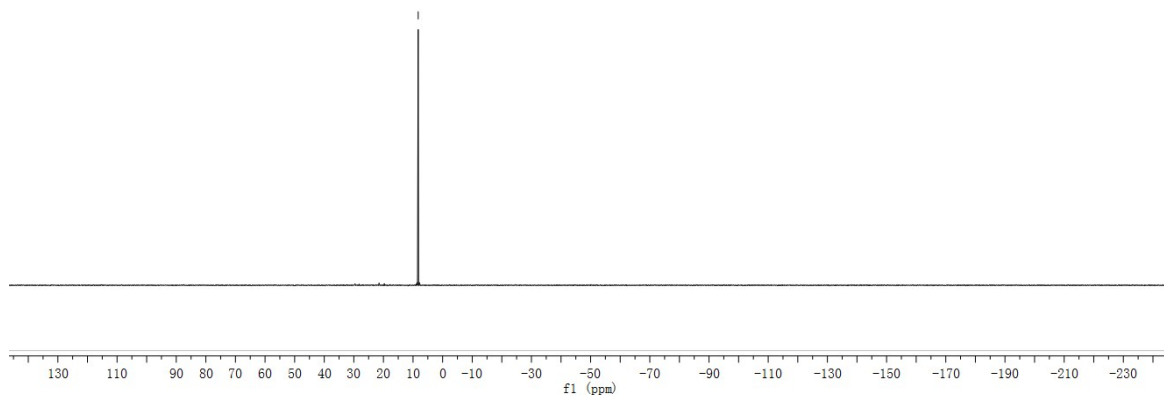



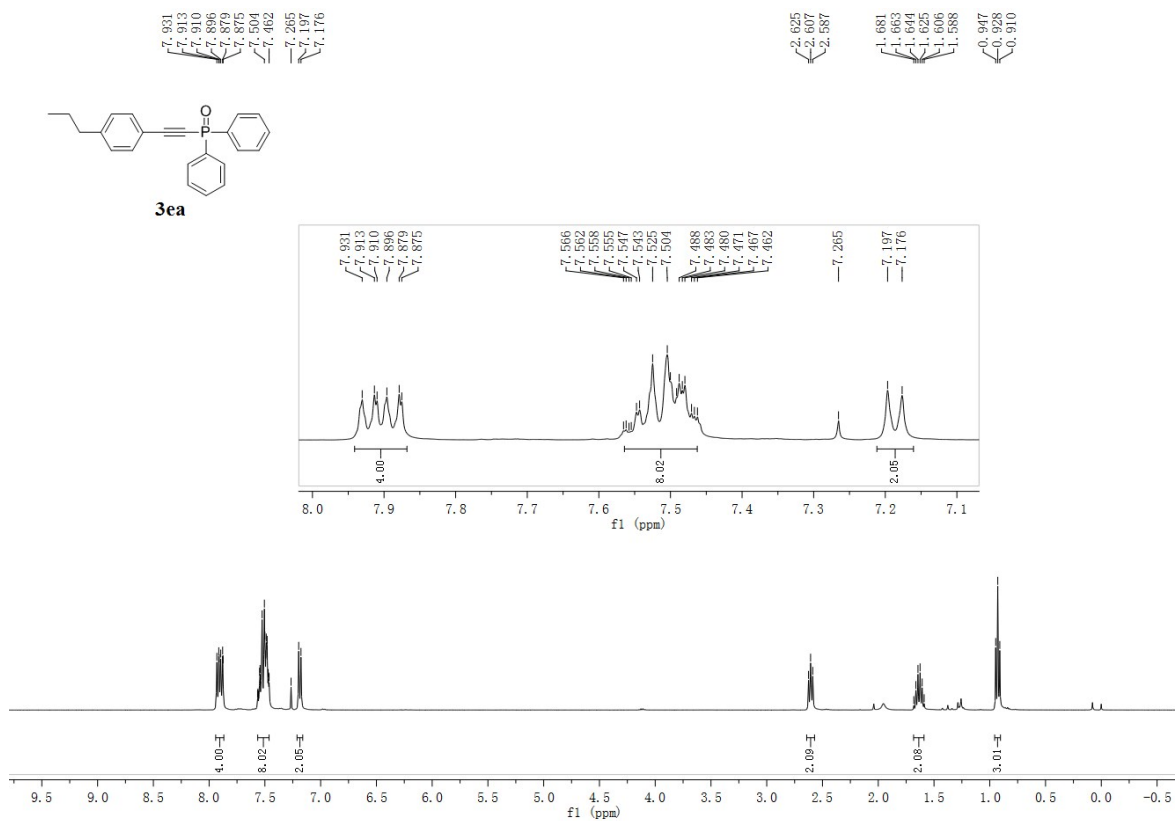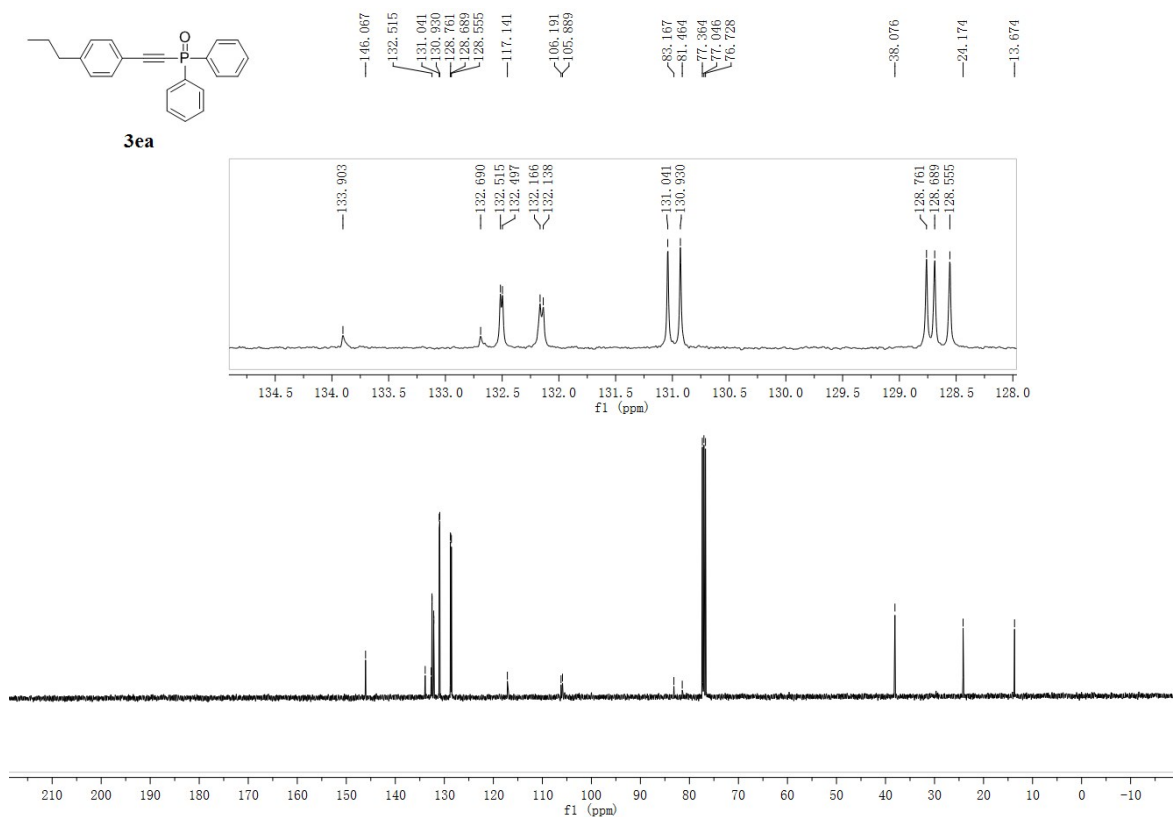

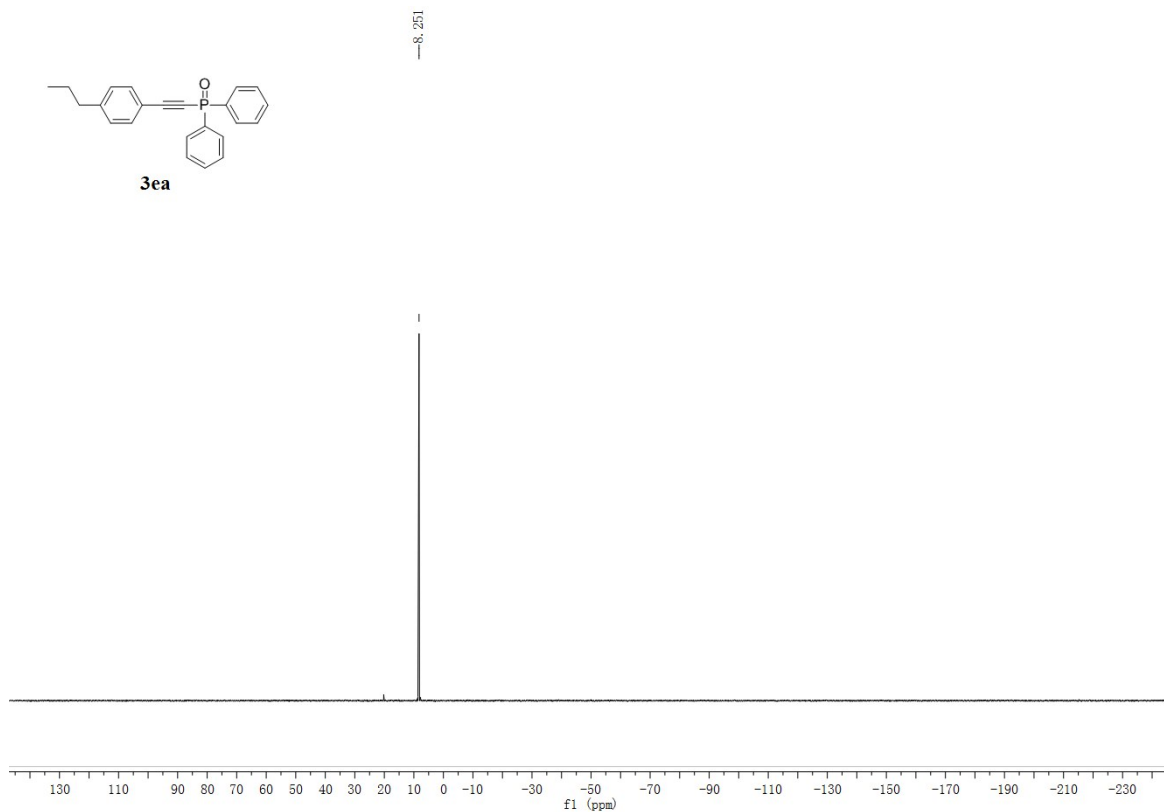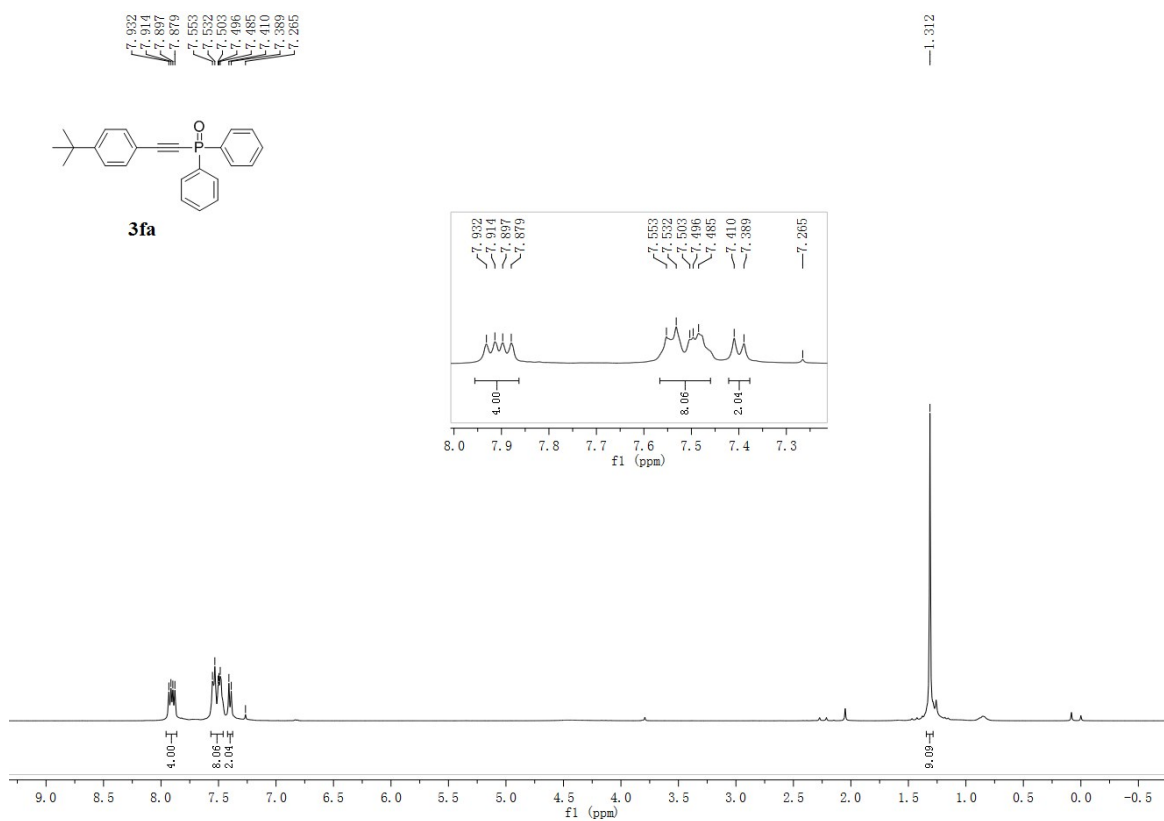

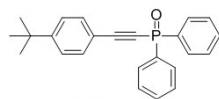

**3fa**

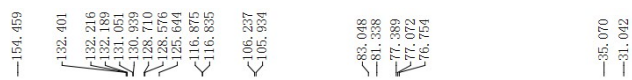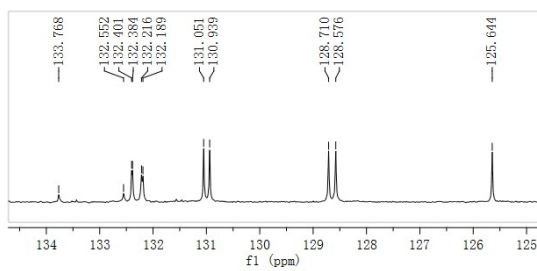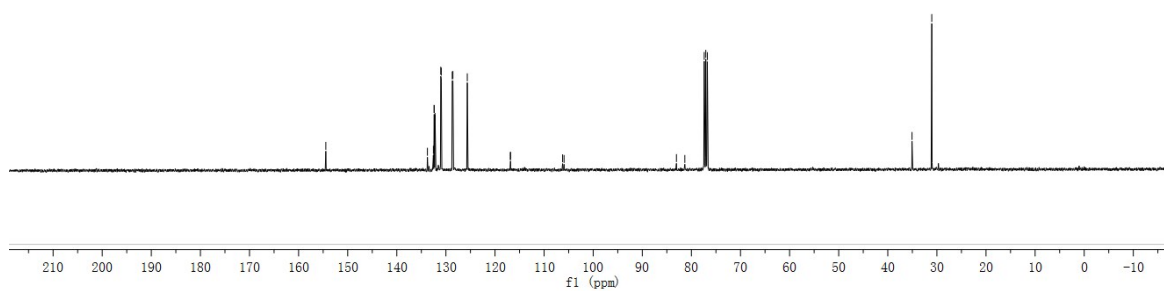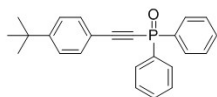

**3fa**

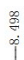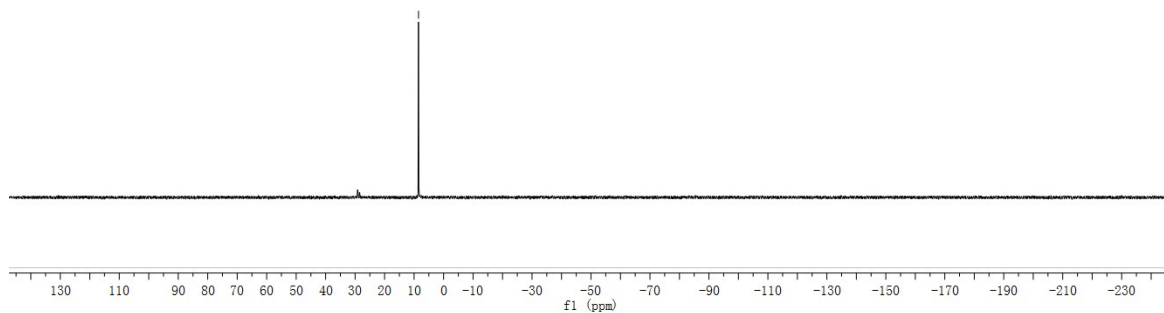

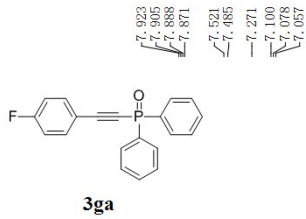

7.923  
 7.905  
 7.888  
 7.871  
 7.521  
 7.485  
 7.271  
 7.100  
 7.078  
 7.057

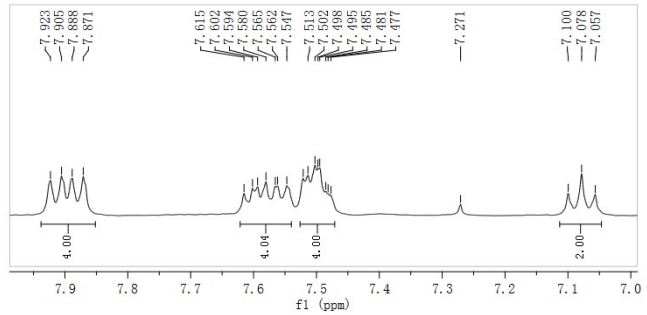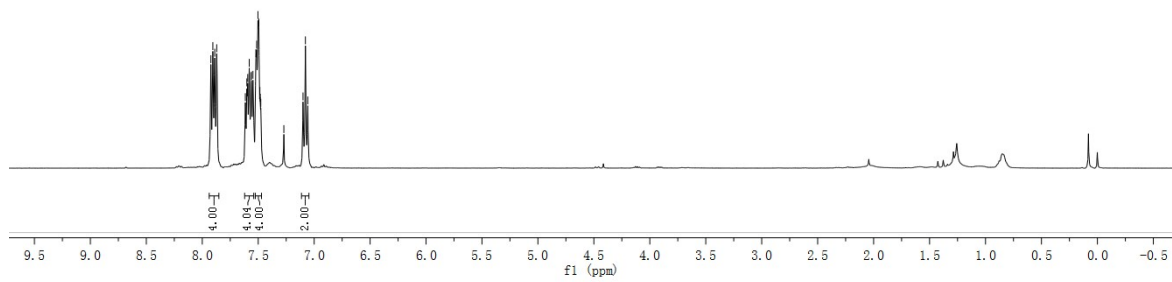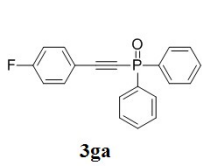

165.156  
 162.635  
 134.859  
 134.752  
 133.556  
 132.329  
 132.300  
 131.029  
 128.762  
 128.628  
 116.247  
 116.025  
 104.445  
 104.147  
 83.729  
 82.052  
 77.374  
 77.057  
 76.739

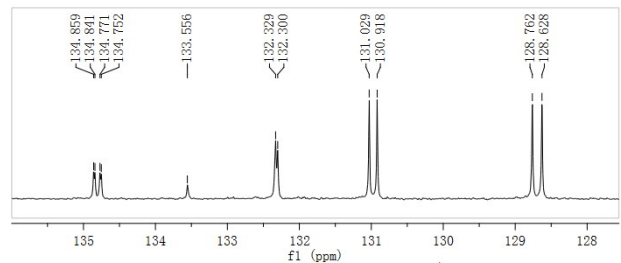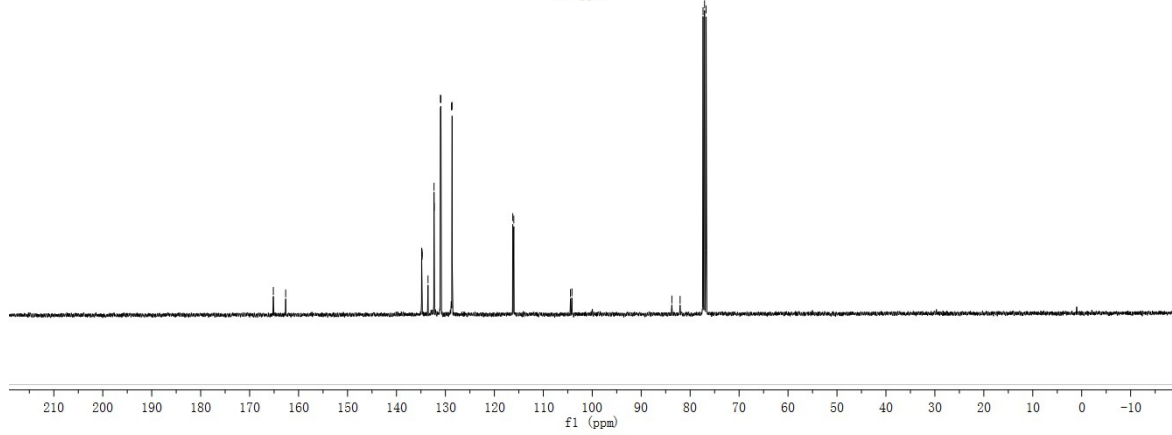

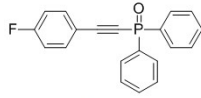

**3ga**

—8.308

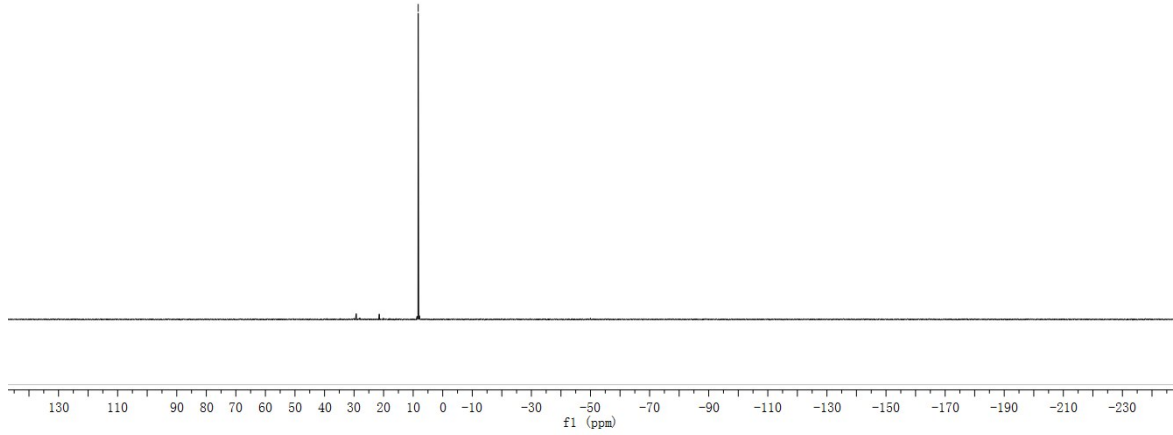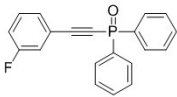

**3ha**

7.912  
7.900  
7.889  
7.876  
7.879  
7.866  
7.854  
7.844  
7.806  
7.501  
7.494  
7.489  
7.393  
7.380  
7.370  
7.358  
7.347  
7.335  
7.295  
7.277  
7.271  
7.174  
7.160  
7.146

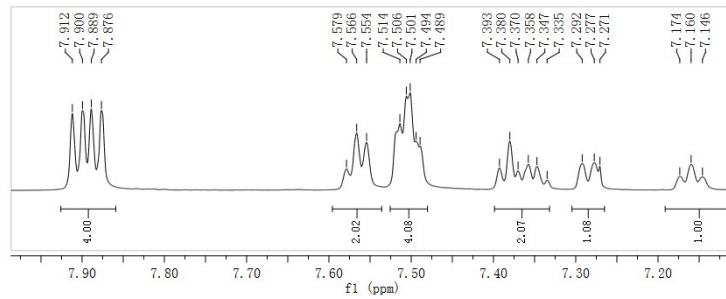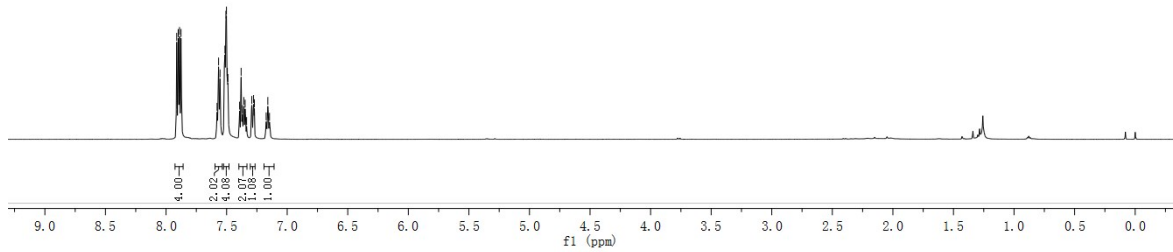

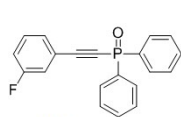

**3ha**

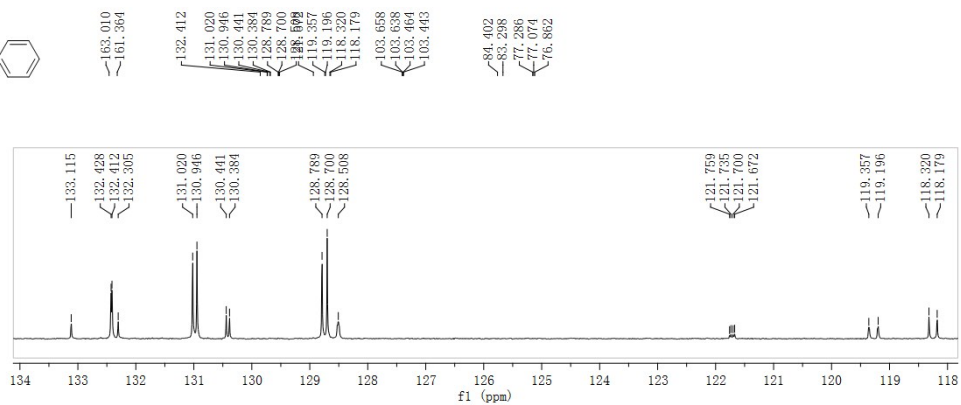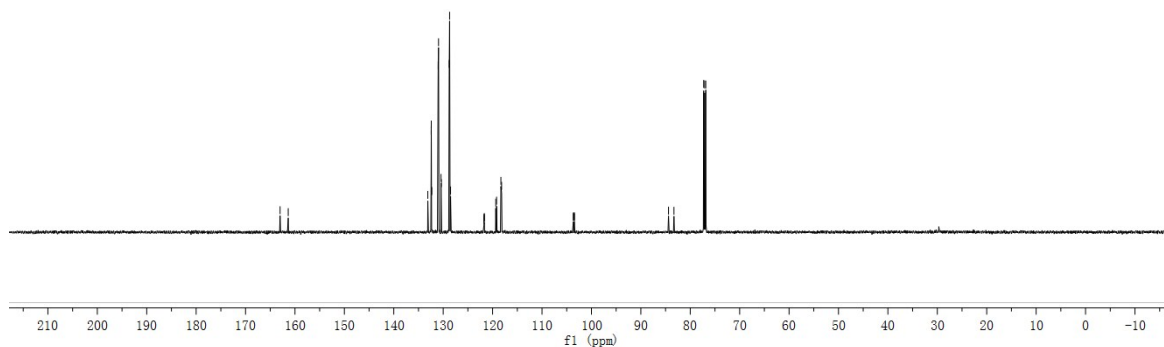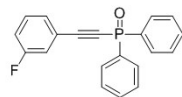

**3ha**

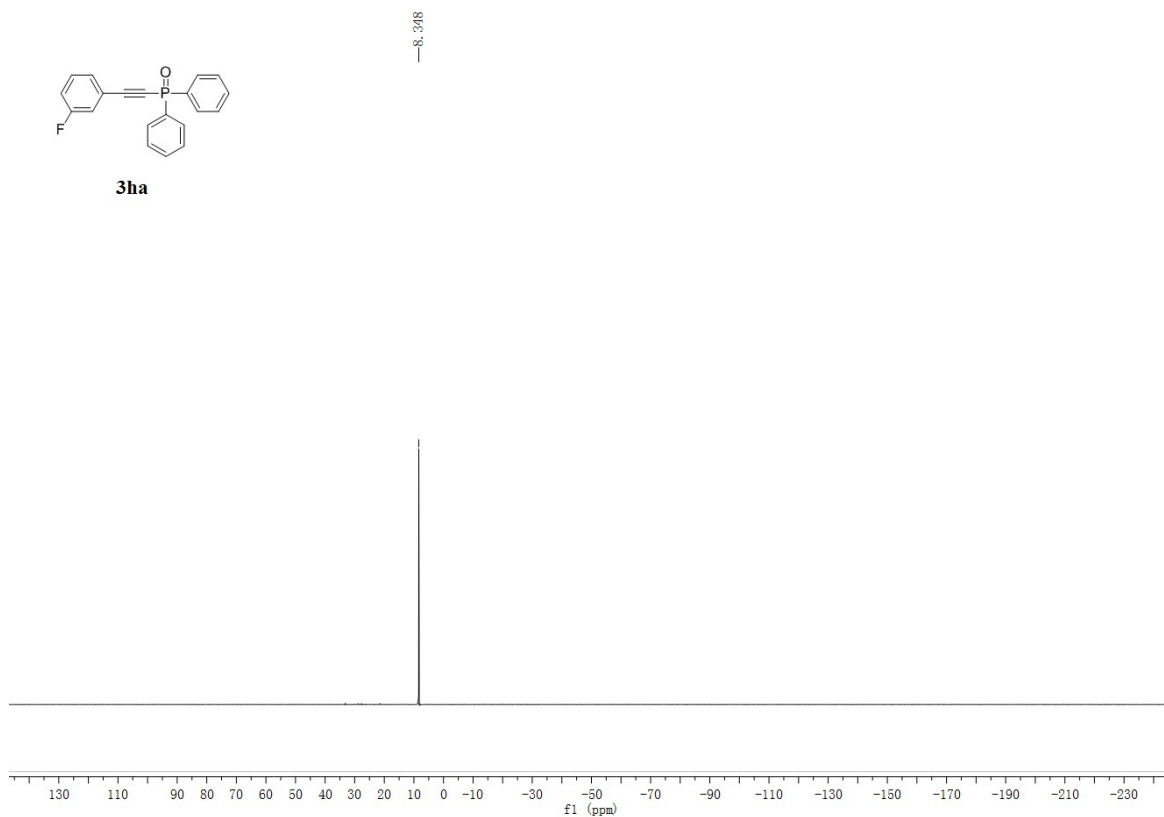

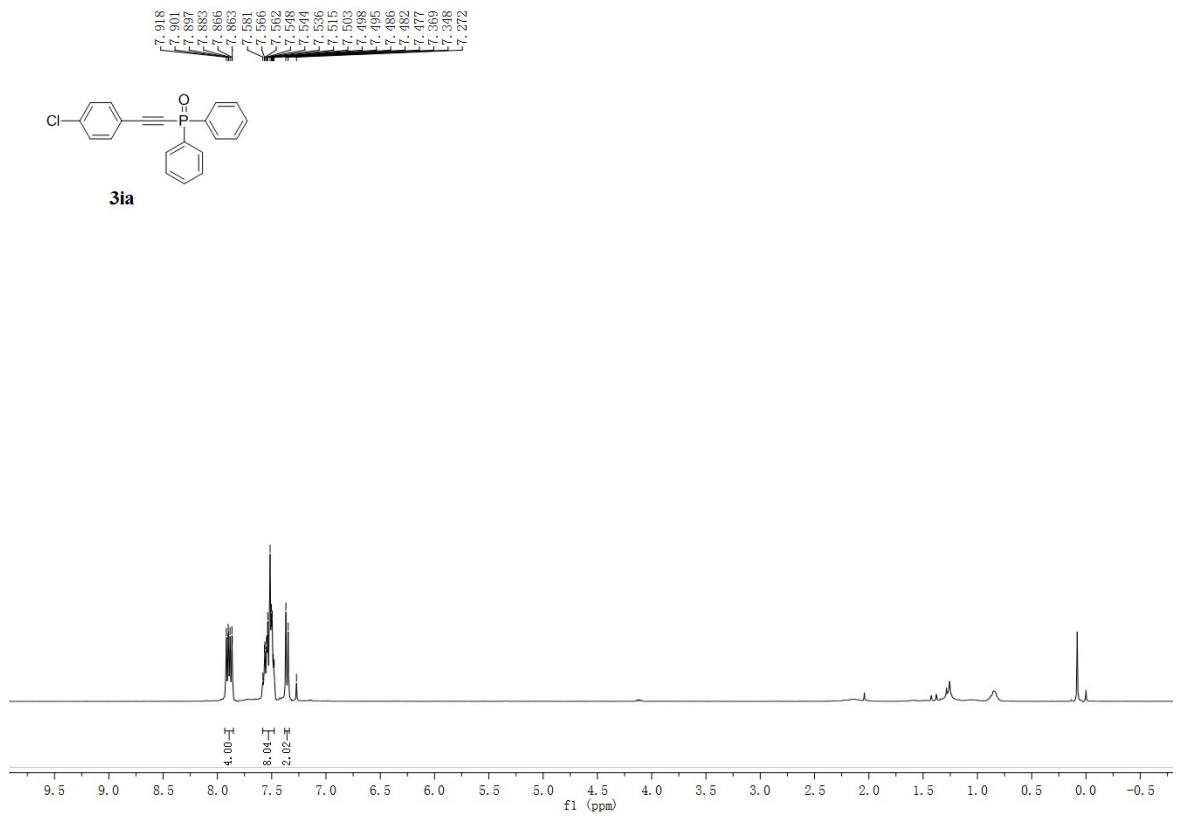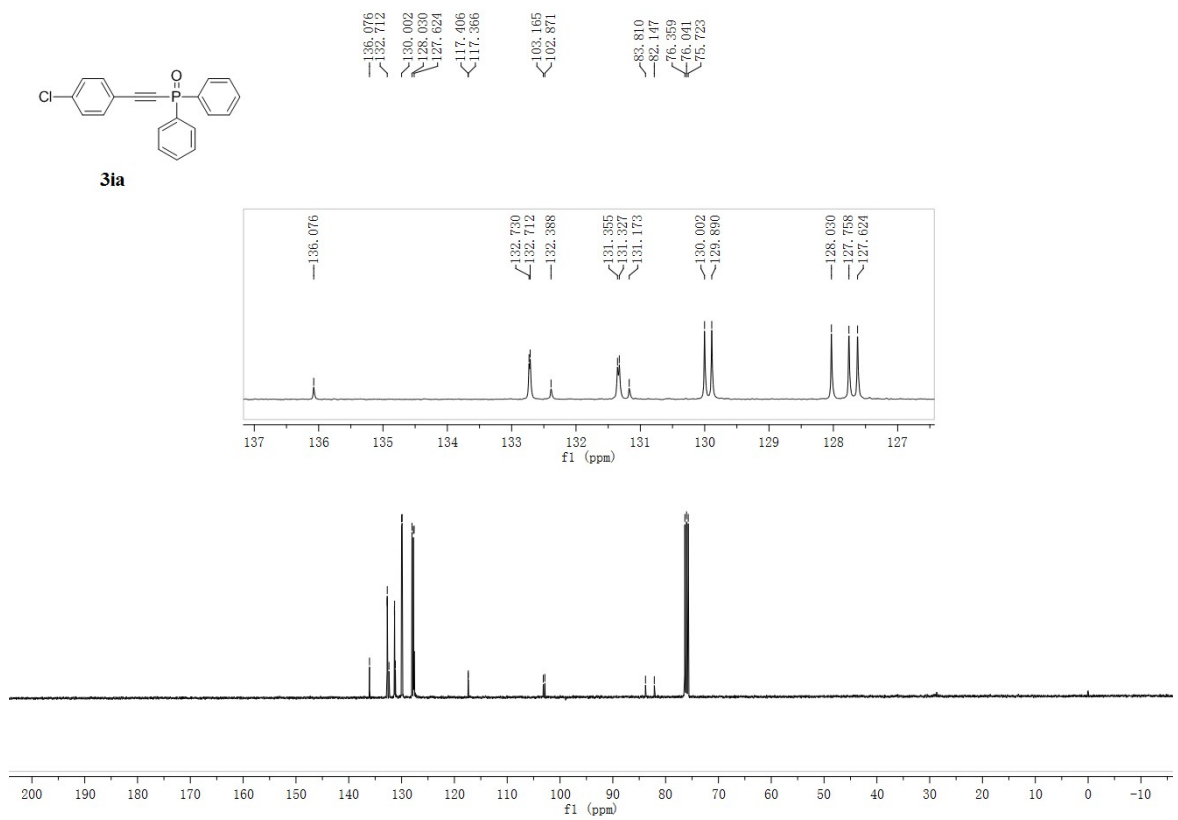

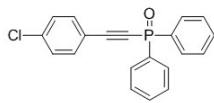

3ia

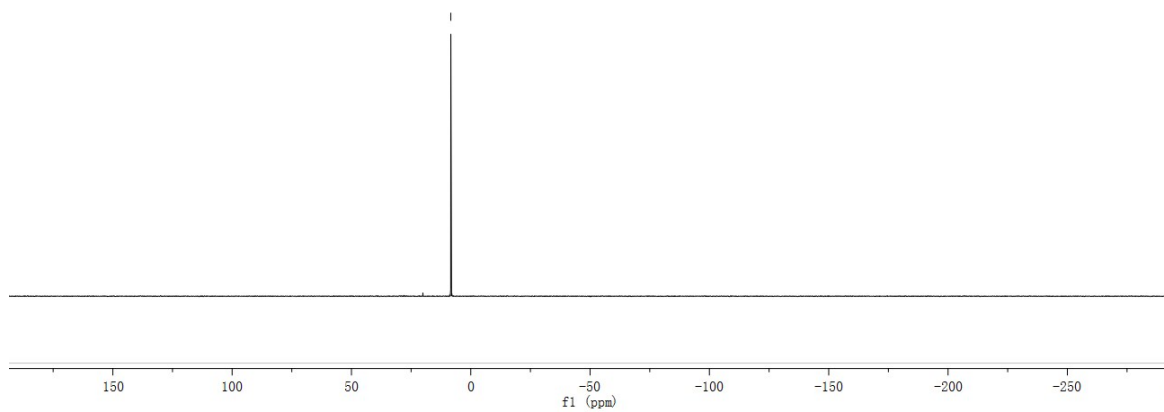

—8.366

7.917  
7.900  
7.896  
7.882  
7.865  
7.861  
7.594  
7.590  
7.576  
7.571  
7.561  
7.557  
7.553  
7.529  
7.526  
7.521  
7.514  
7.510  
7.506  
7.497  
7.493  
7.484  
7.481  
7.474  
7.444  
7.441  
7.439  
7.437  
7.421  
7.418  
7.410  
7.340  
7.321  
7.301

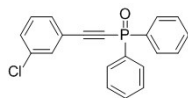

3ja

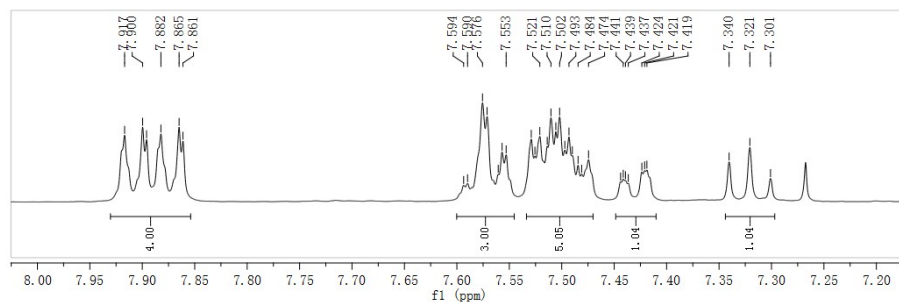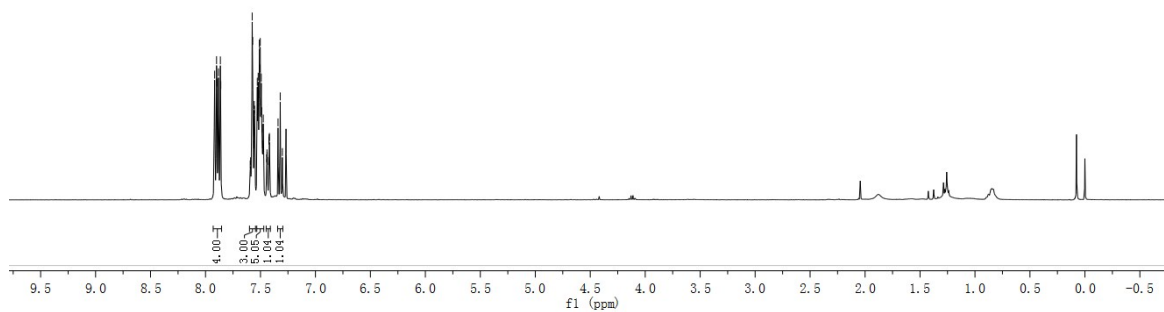



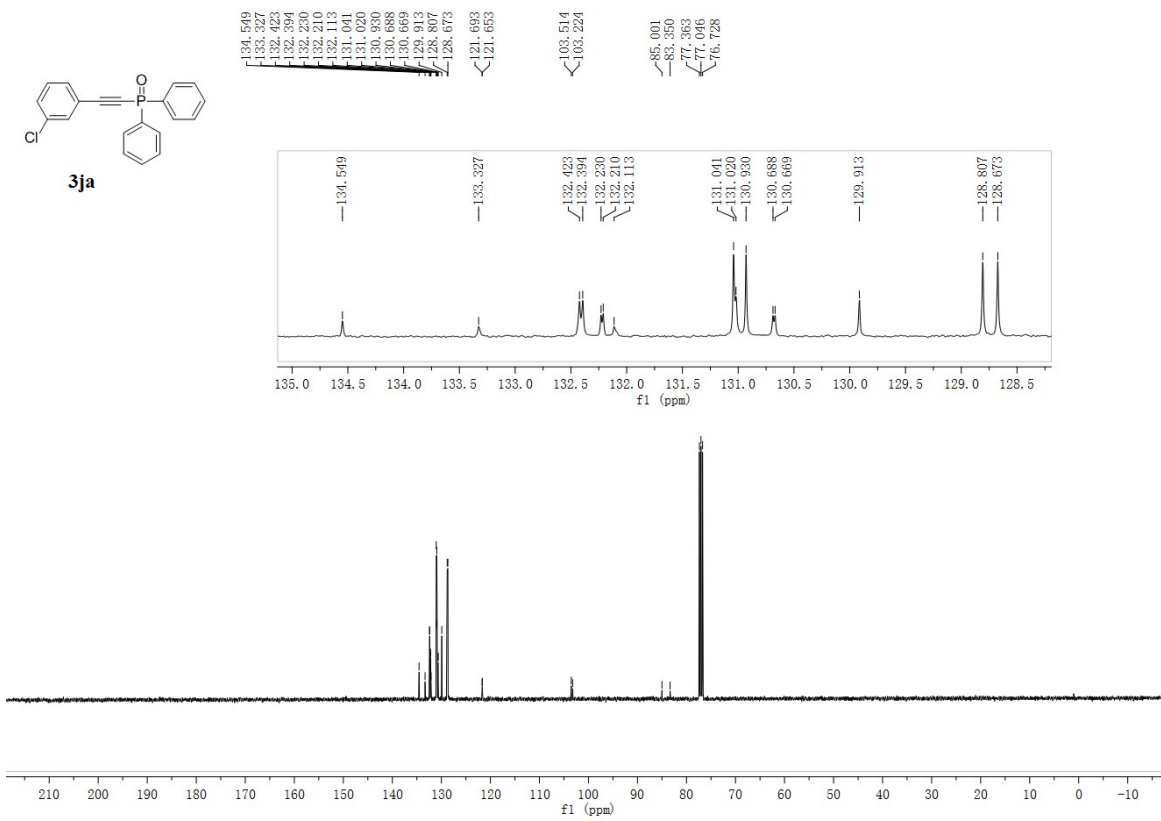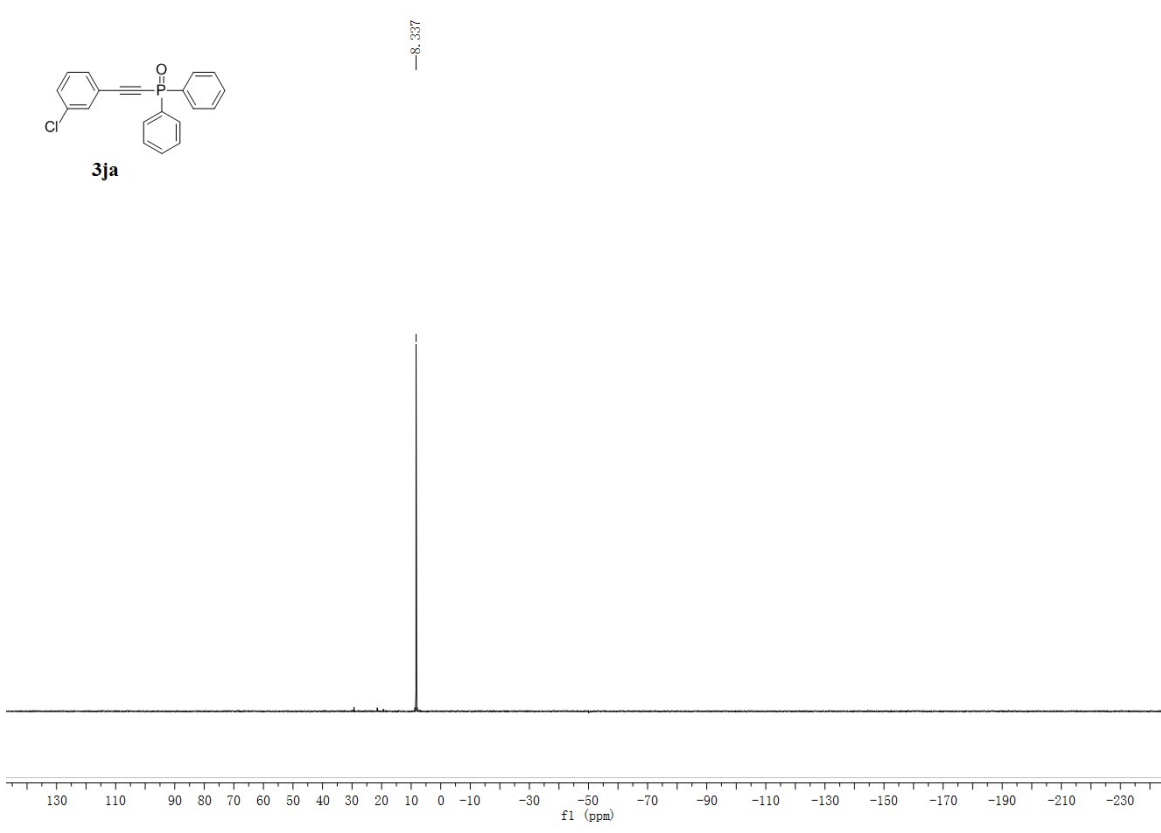

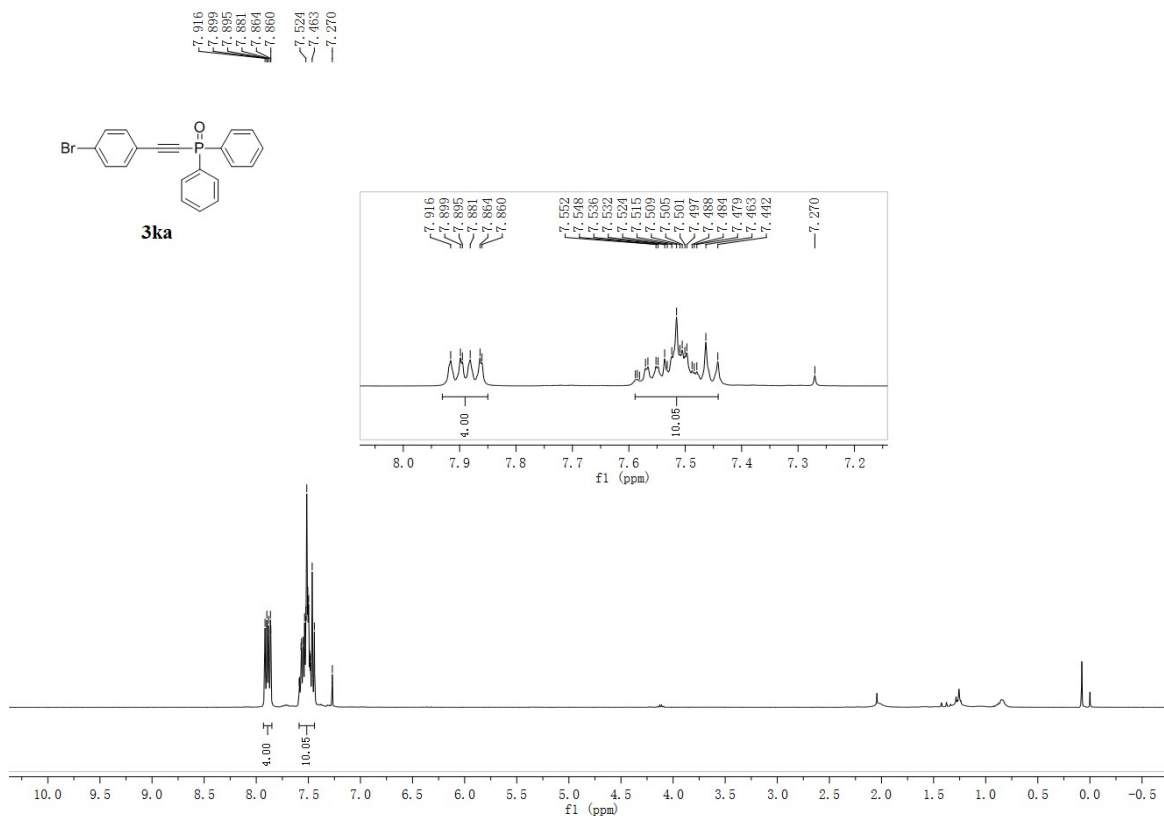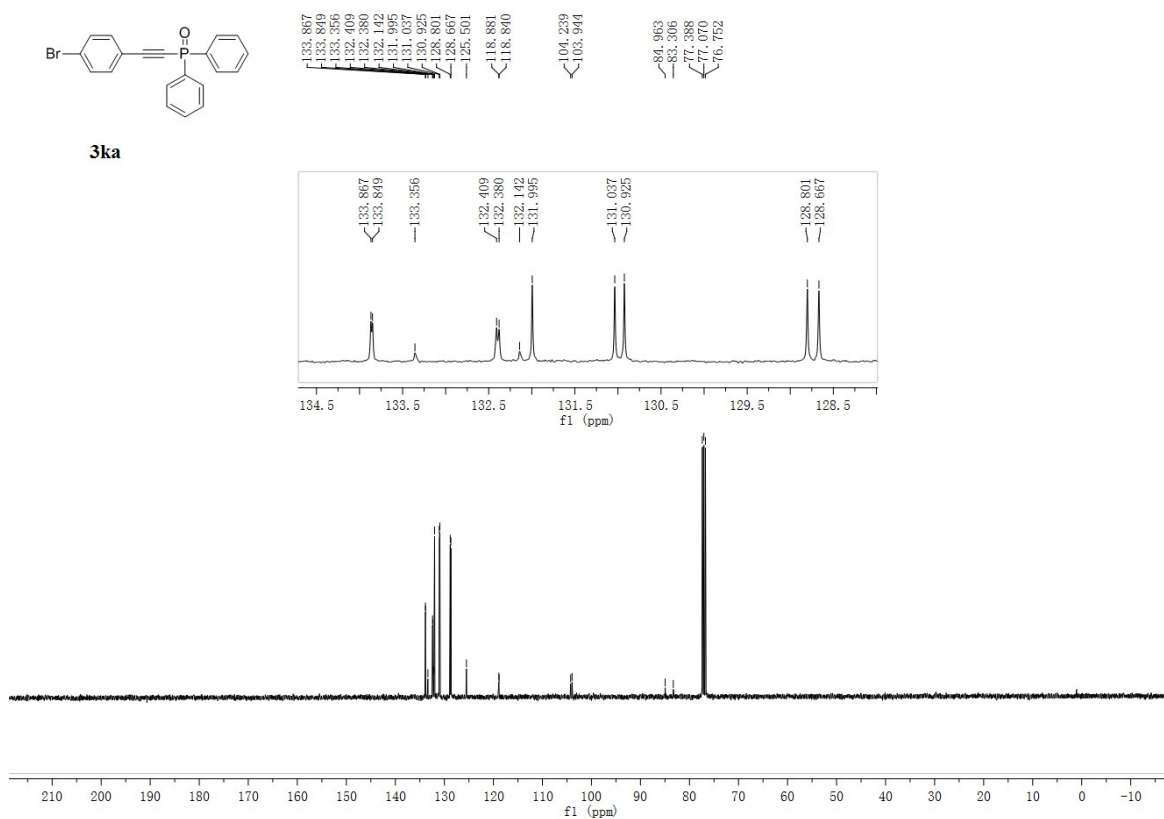

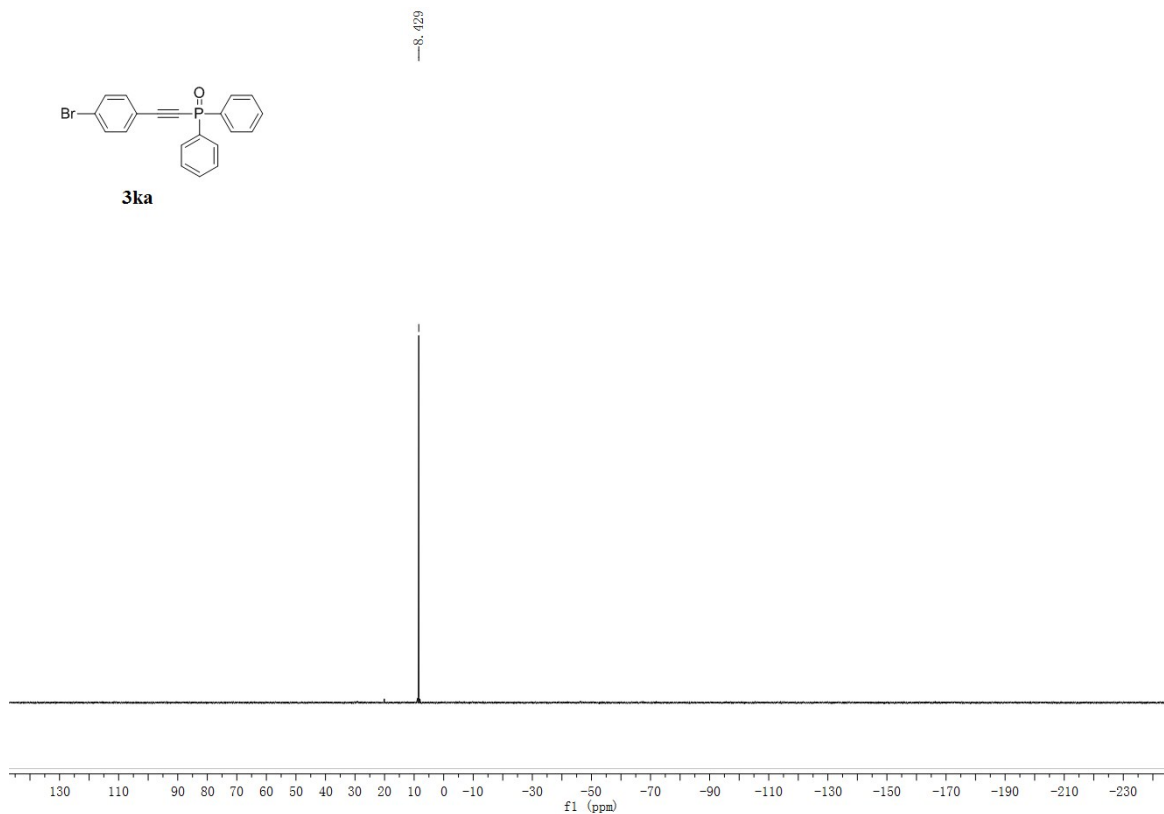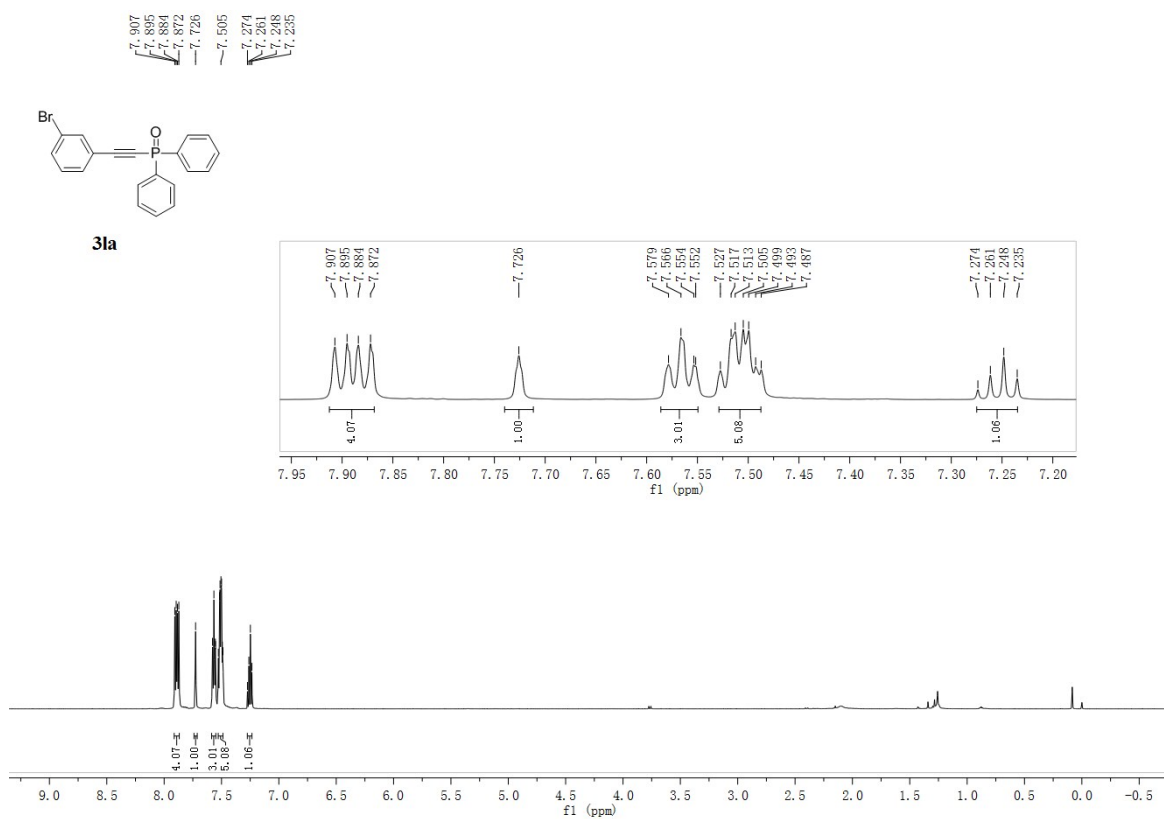

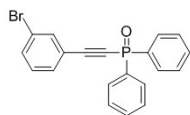

**3a**

135.054  
135.043  
133.901  
133.085  
132.443  
132.427  
132.276  
131.110  
131.018  
130.945  
130.102  
128.713  
122.385  
121.929  
121.903  
103.340  
103.145  
84.822  
83.723  
77.309  
76.838  
76.886

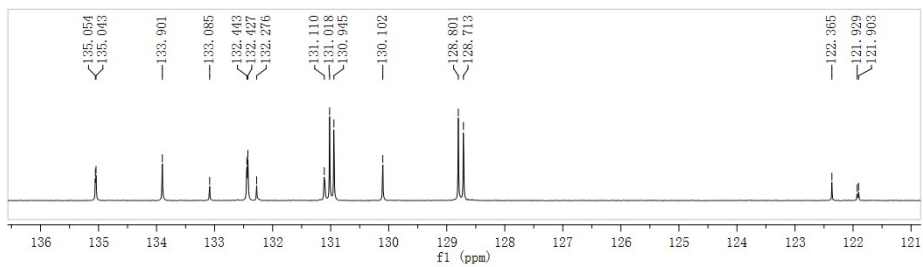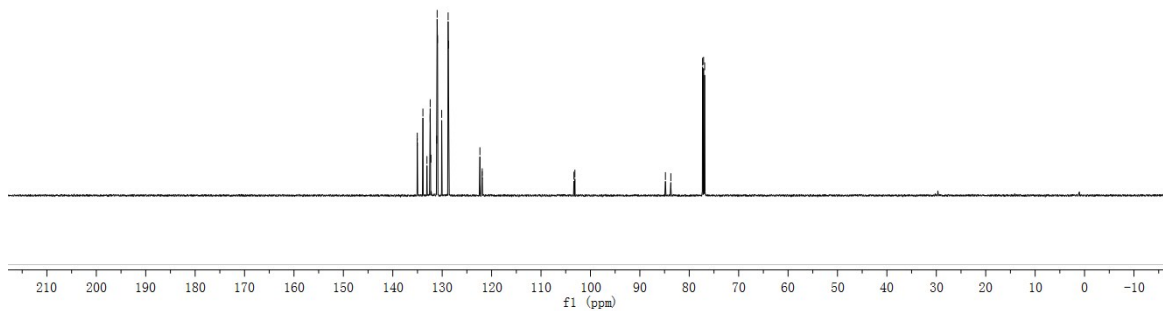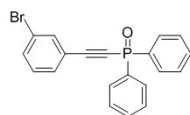

**3a**

8.311

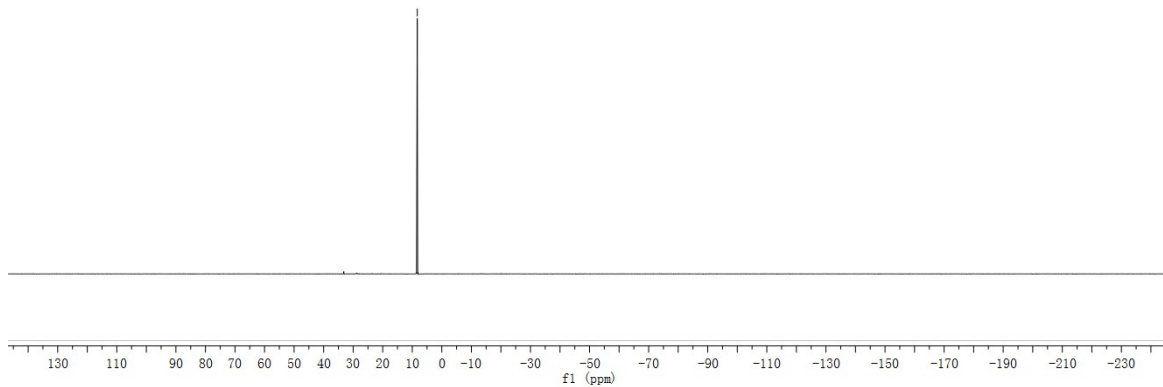

7.916  
7.904  
7.893  
7.881  
7.721  
7.518  
7.265

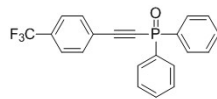

**3ma**

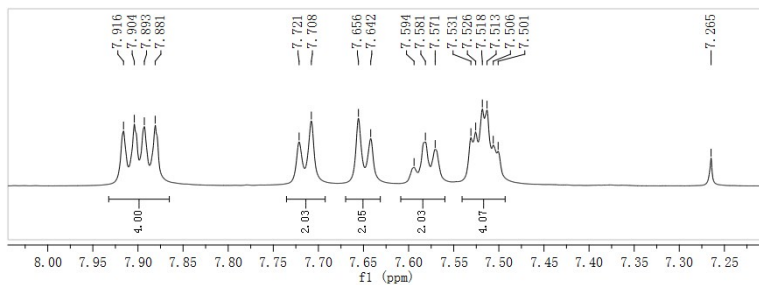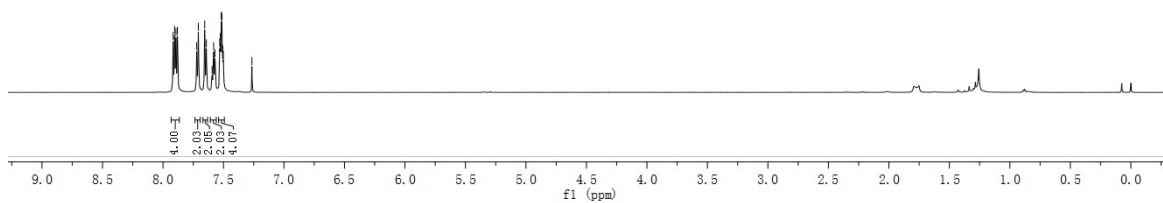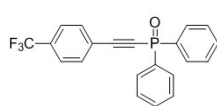

**3ma**

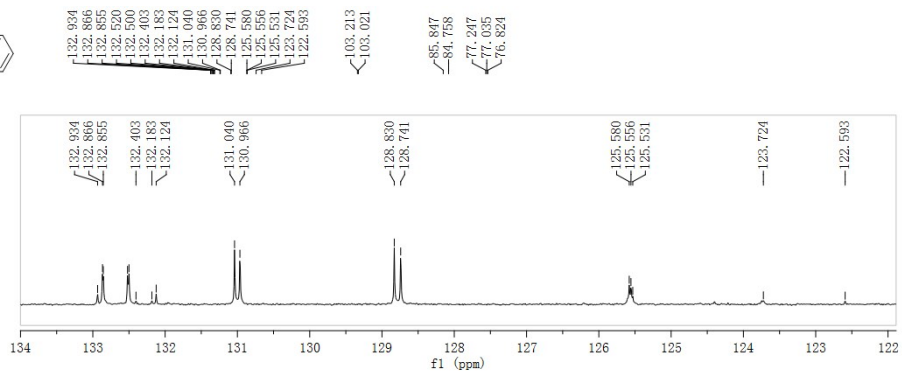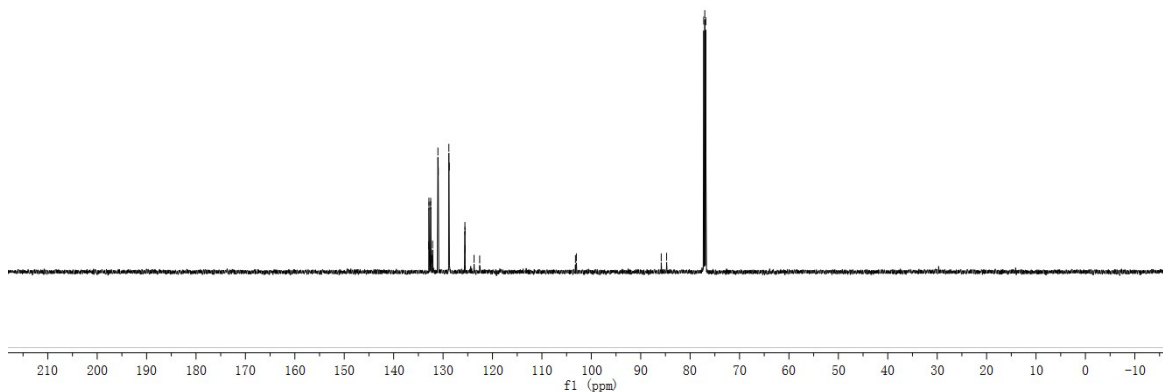

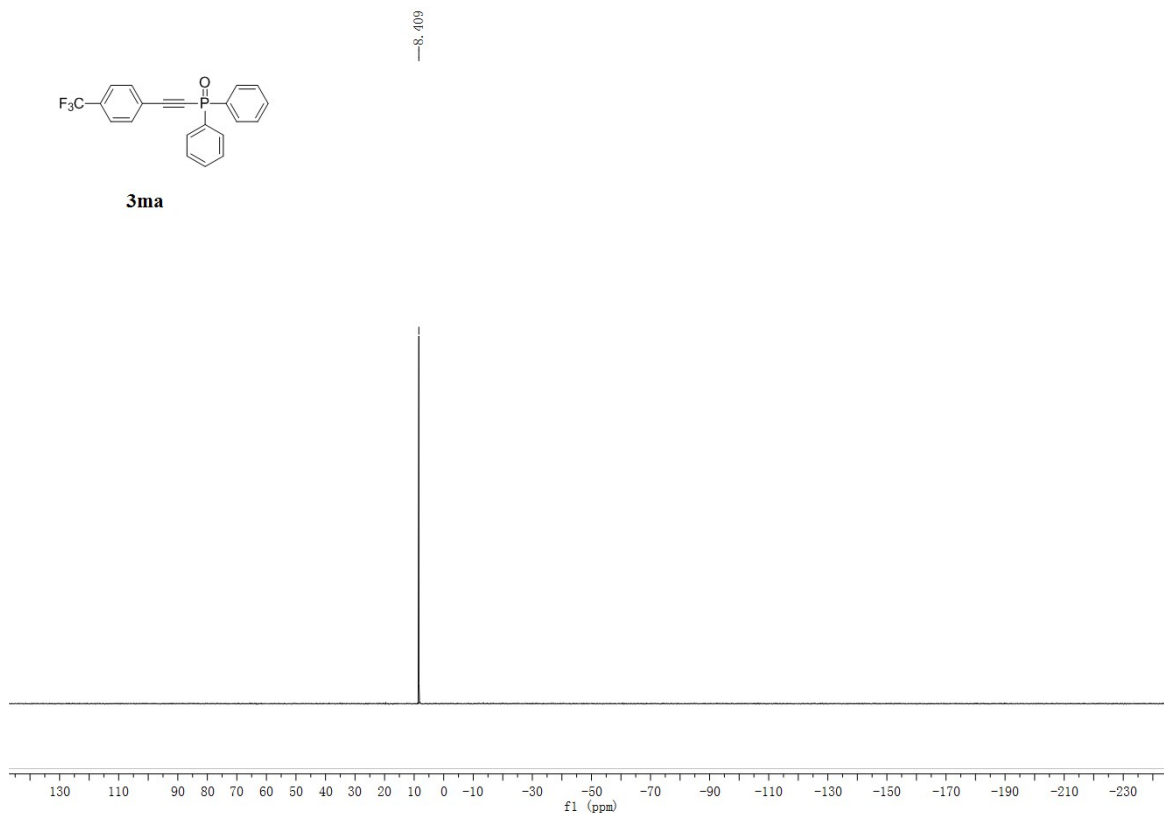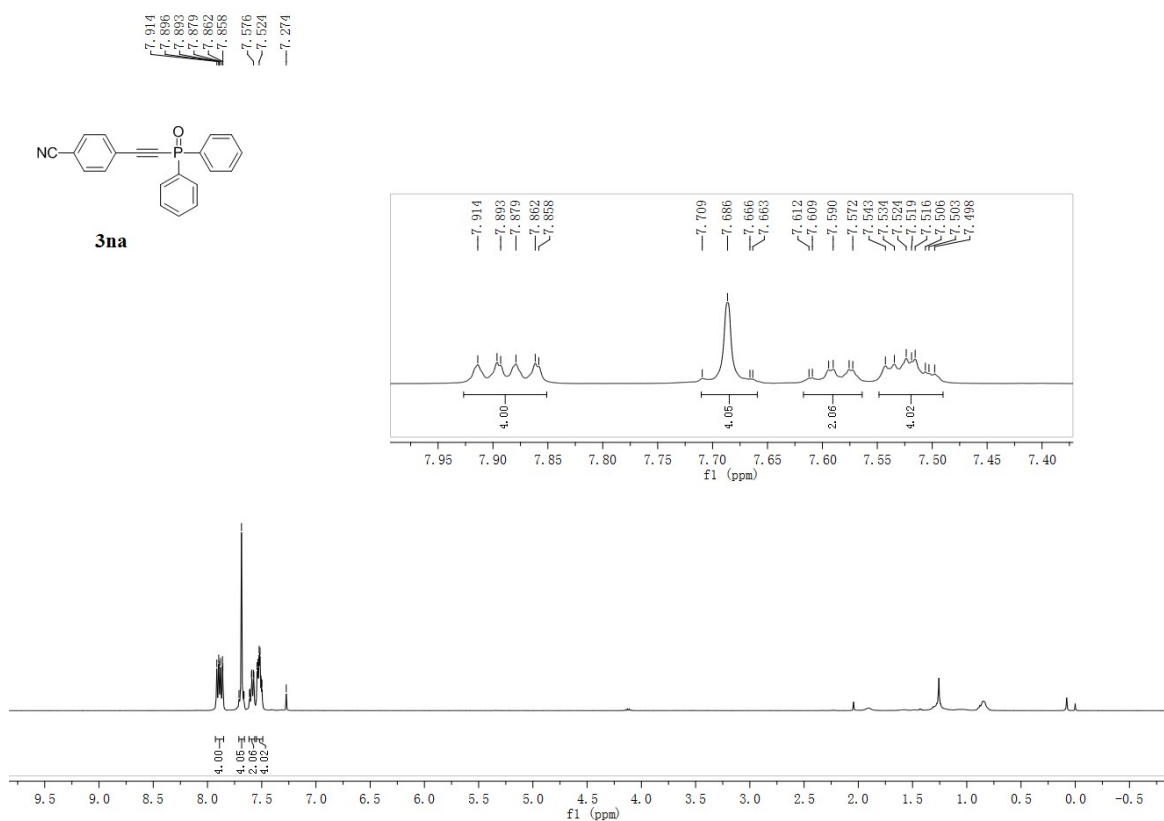

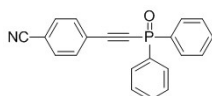

**3na**

133.017  
132.999  
132.911  
132.620  
132.592  
132.237  
131.693  
131.042  
130.930  
128.889  
128.754  
124.679  
124.641  
117.788  
114.106  
102.489  
102.209  
87.889  
86.283  
77.380  
77.022  
76.744

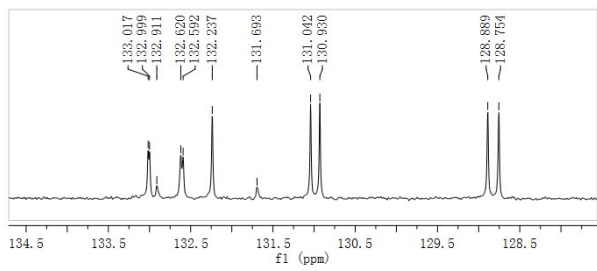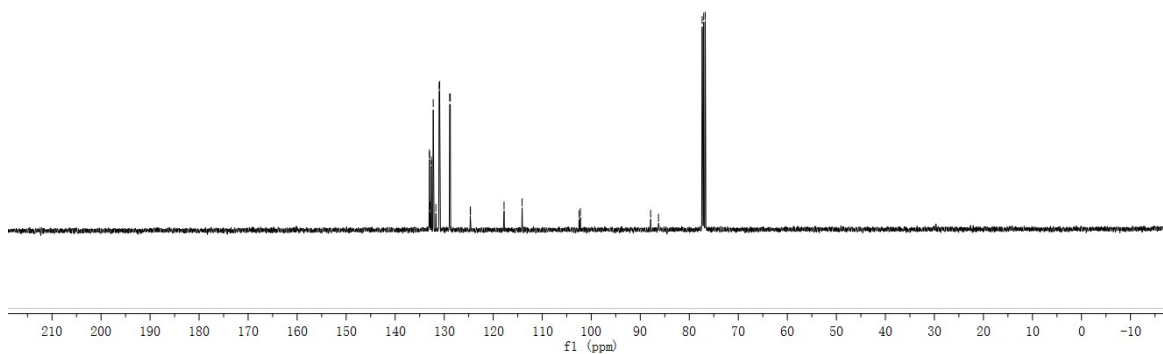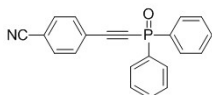

**3na**

-8.461

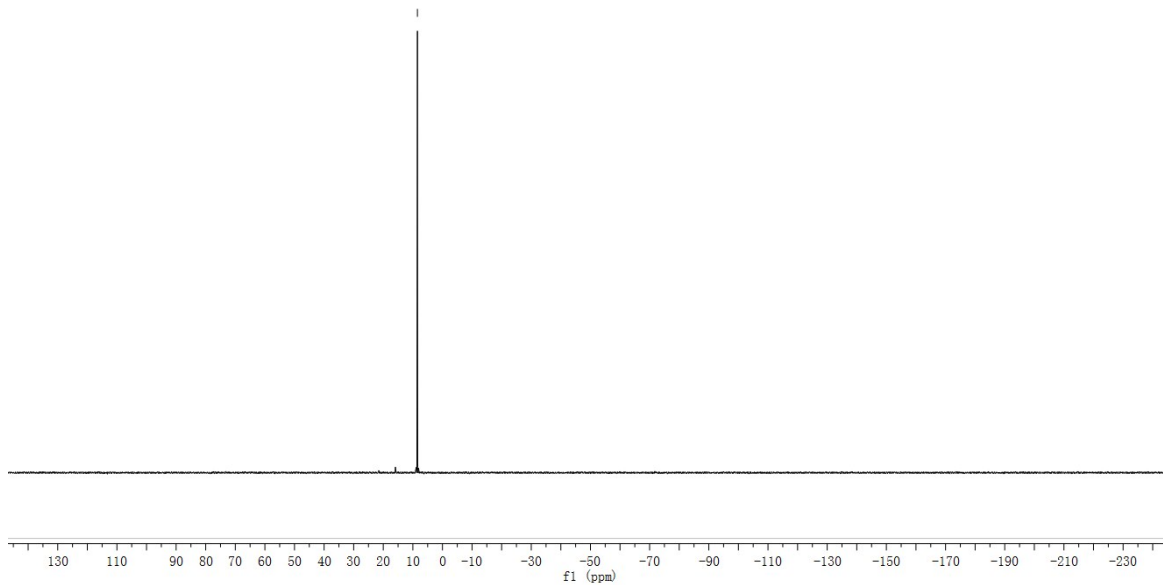

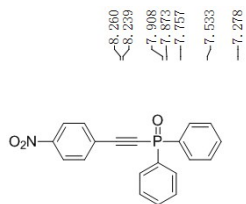

**30a**

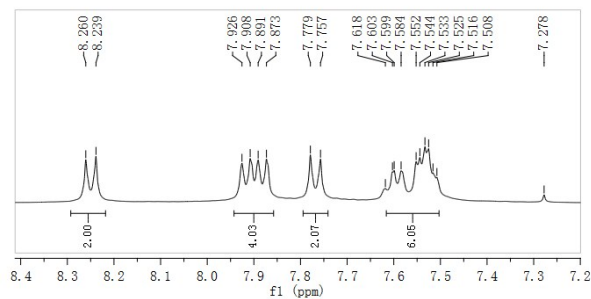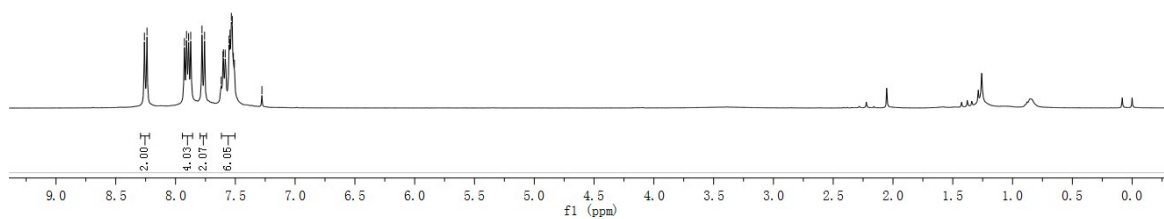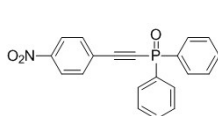

**30a**

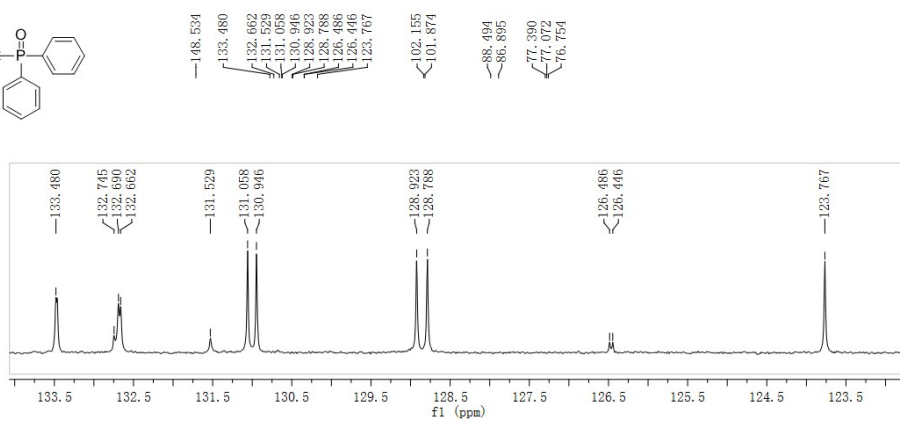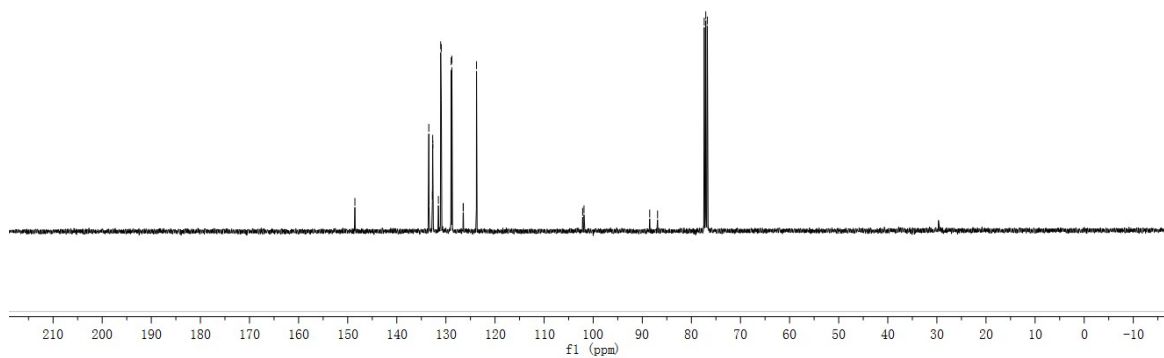



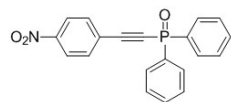

**30a**

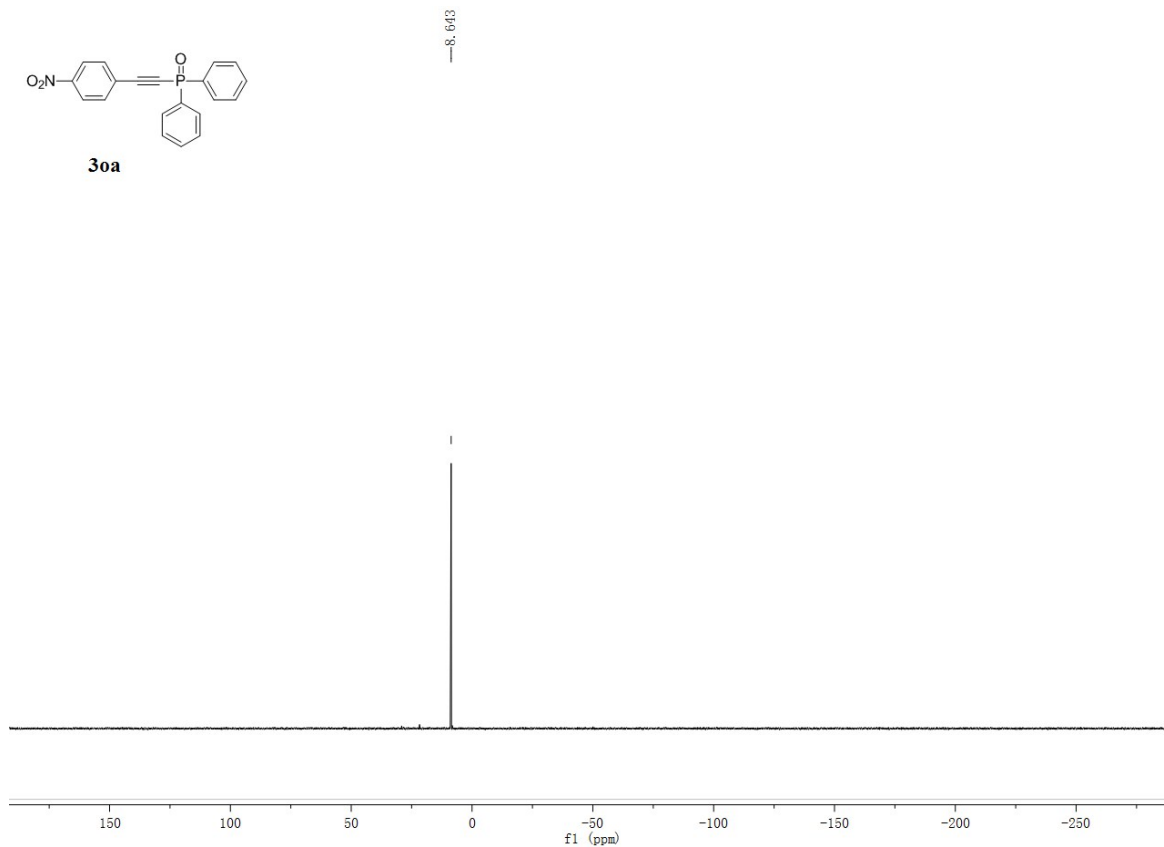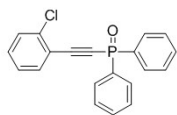

**3qa**

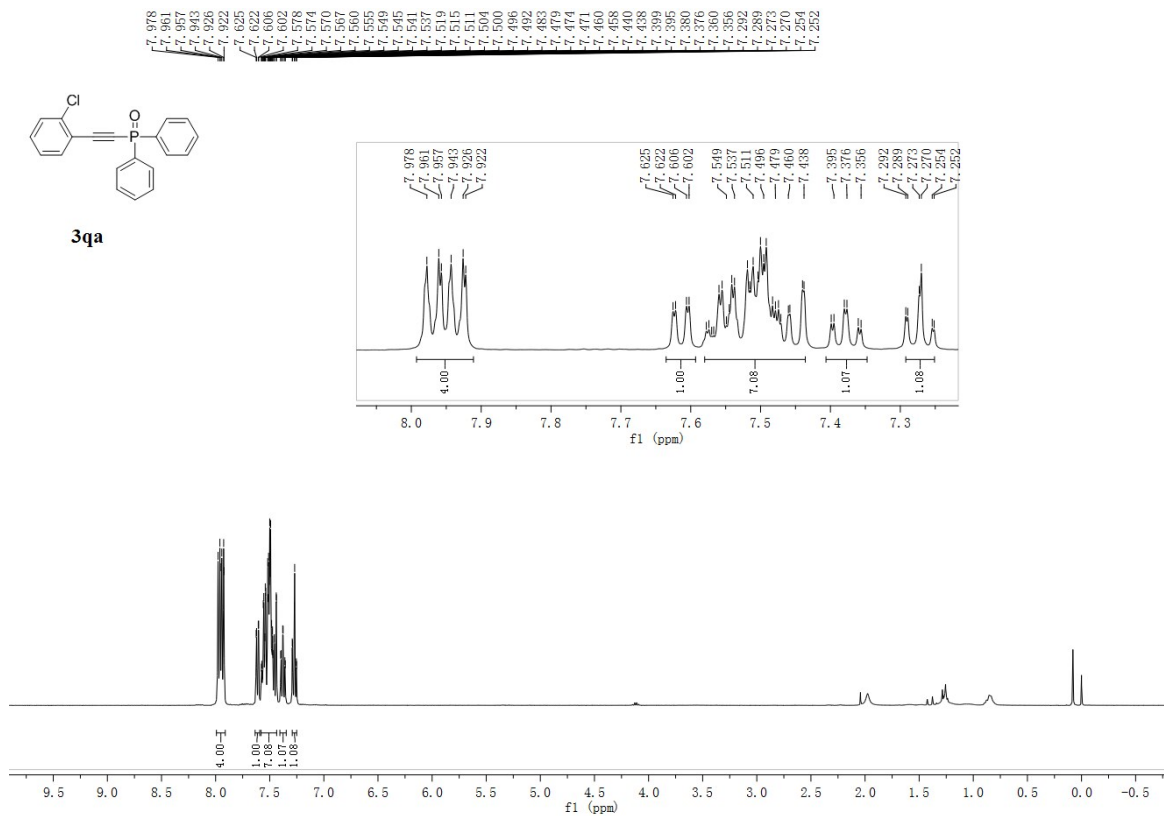

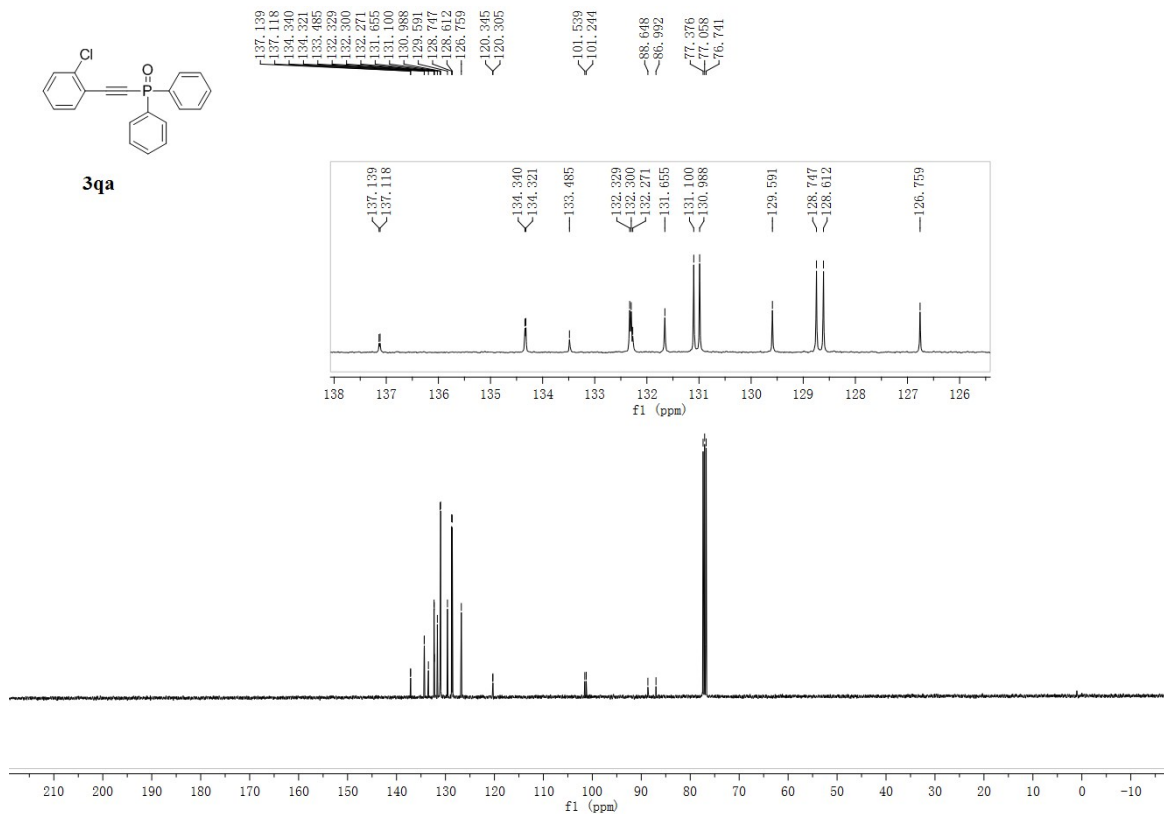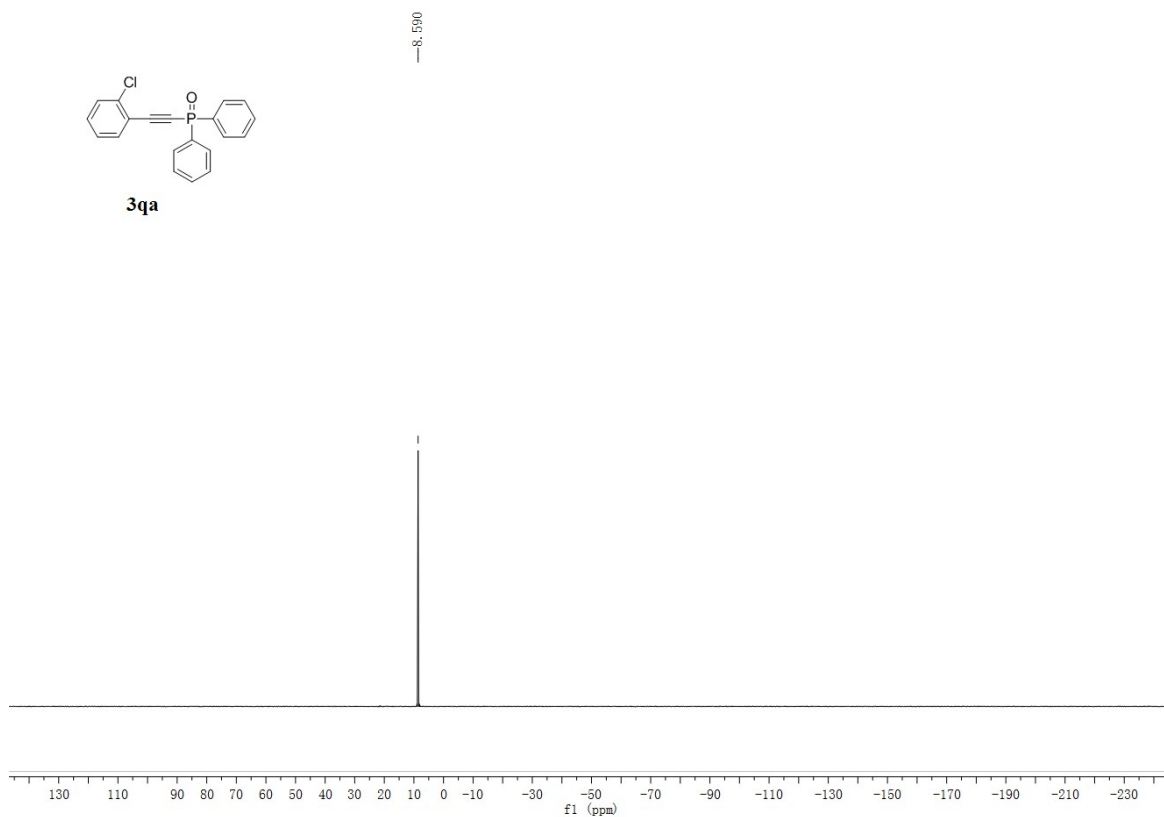

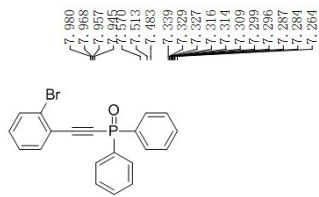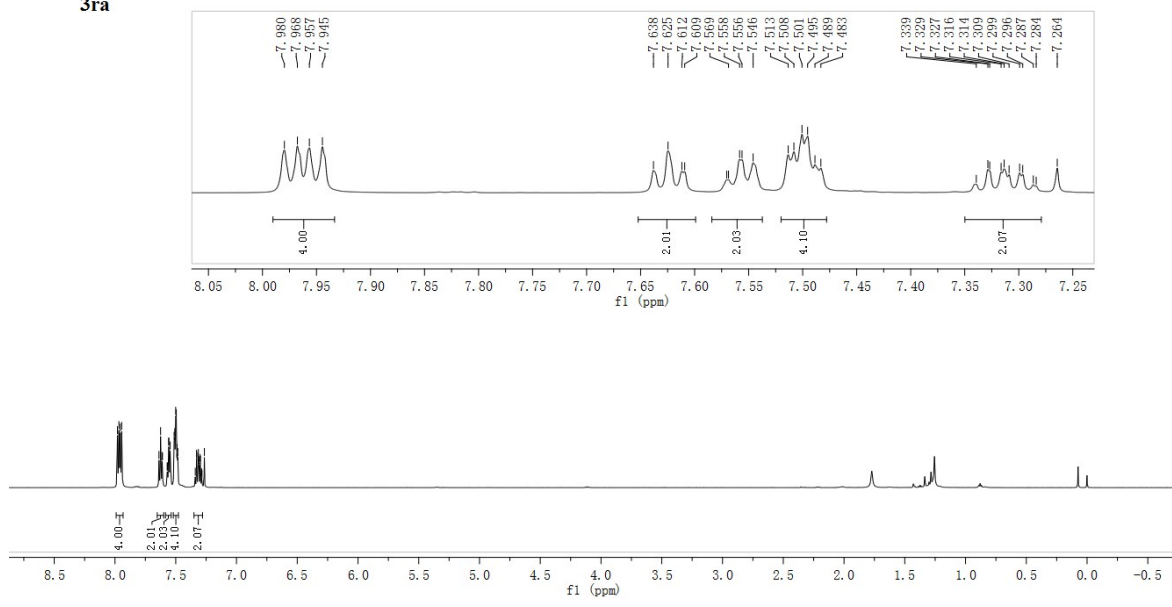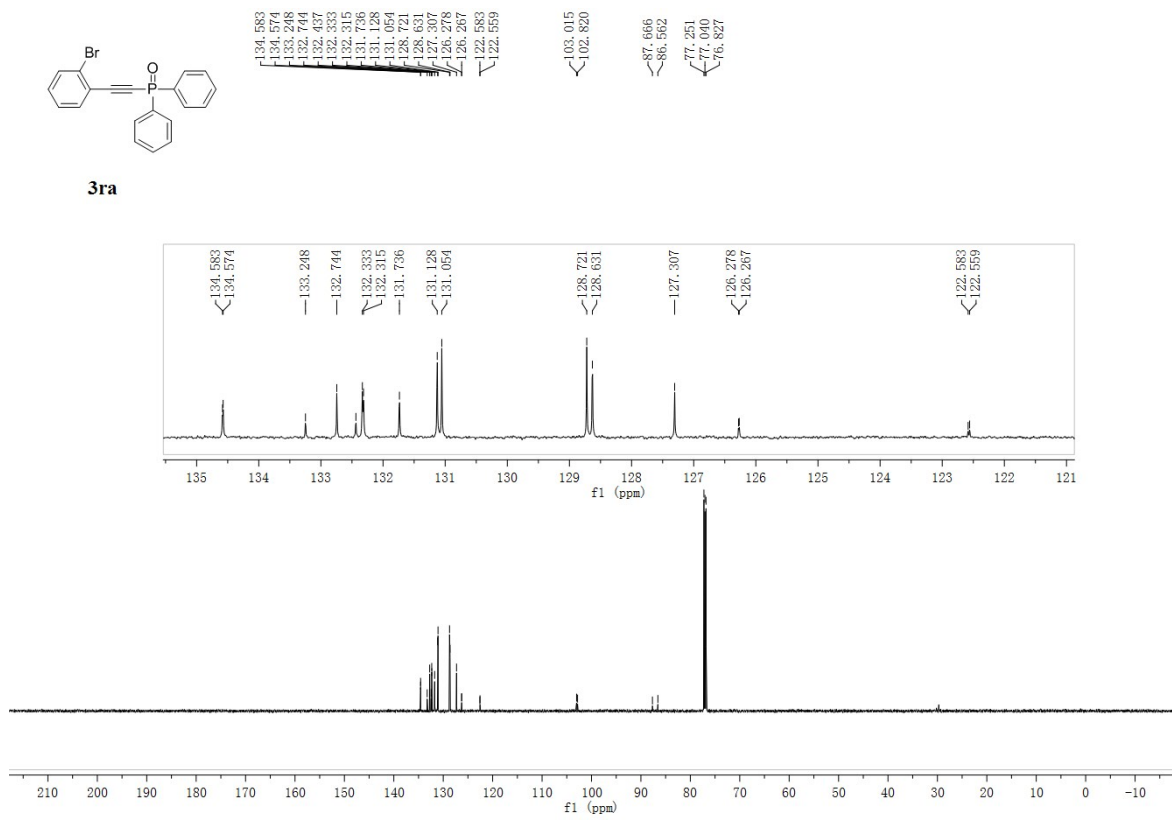

—8.588

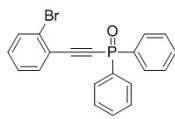

**3ra**

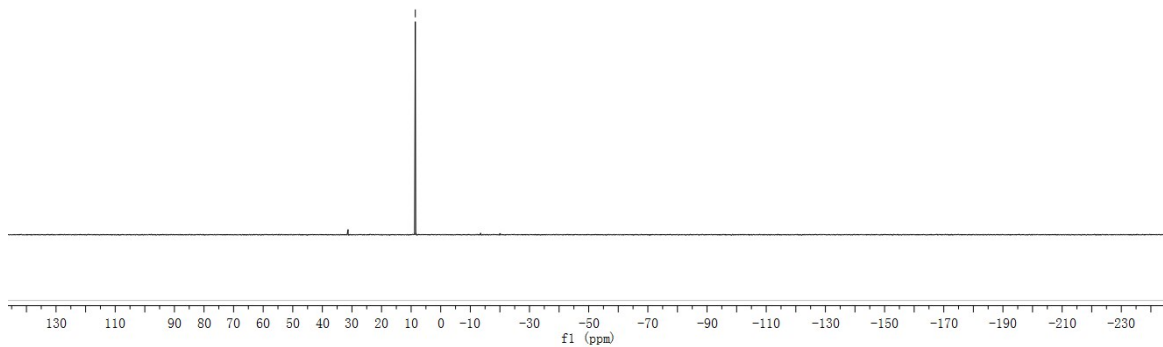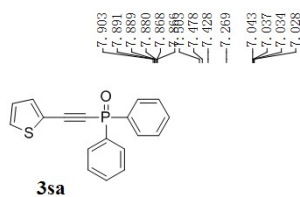

**3sa**

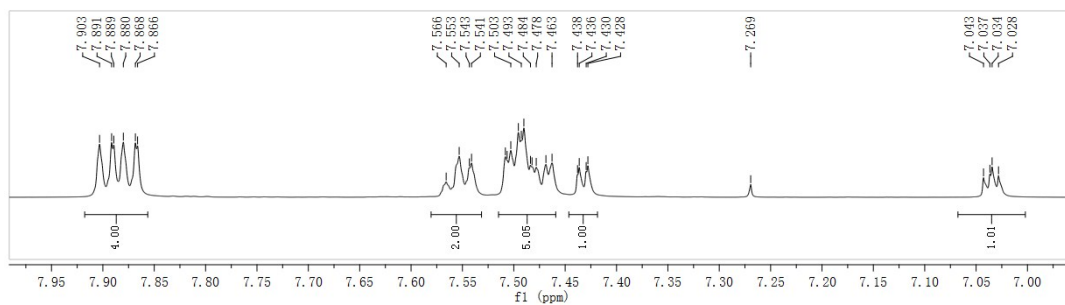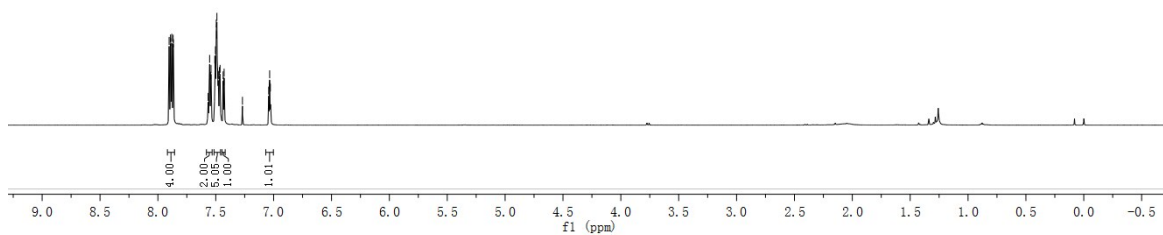

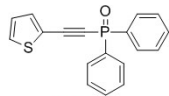

**3sa**

135.856  
135.845  
133.242  
132.429  
132.349  
132.333  
131.056  
130.982  
130.666  
128.756  
128.664  
127.465  
119.643  
119.614  
98.842  
98.639  
87.488  
86.373  
77.289  
77.068  
76.870

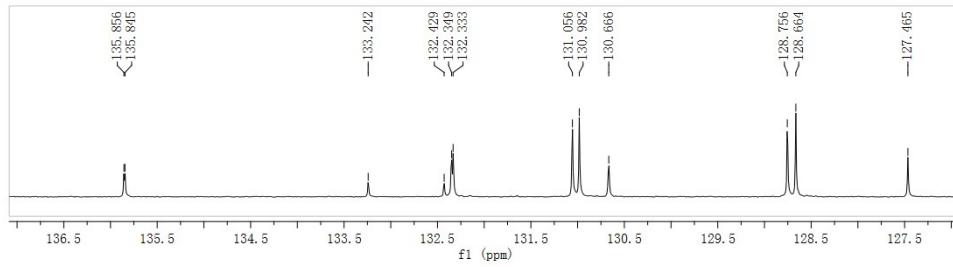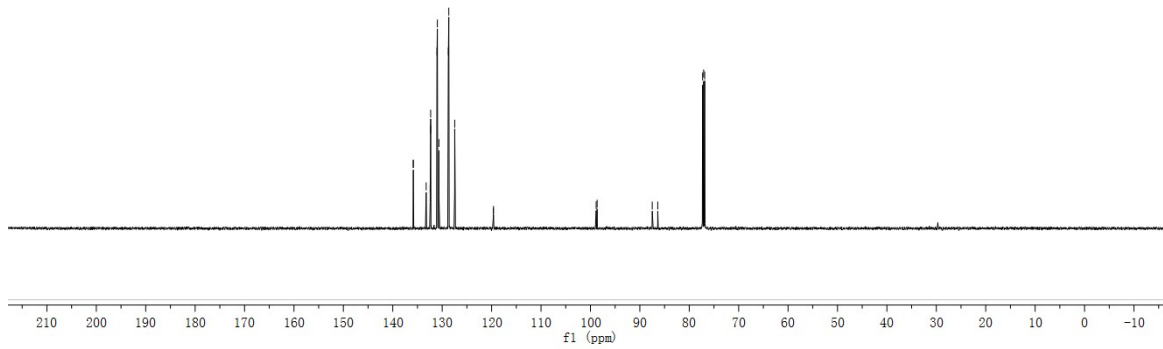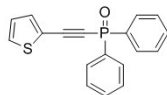

**3sa**

—8.596

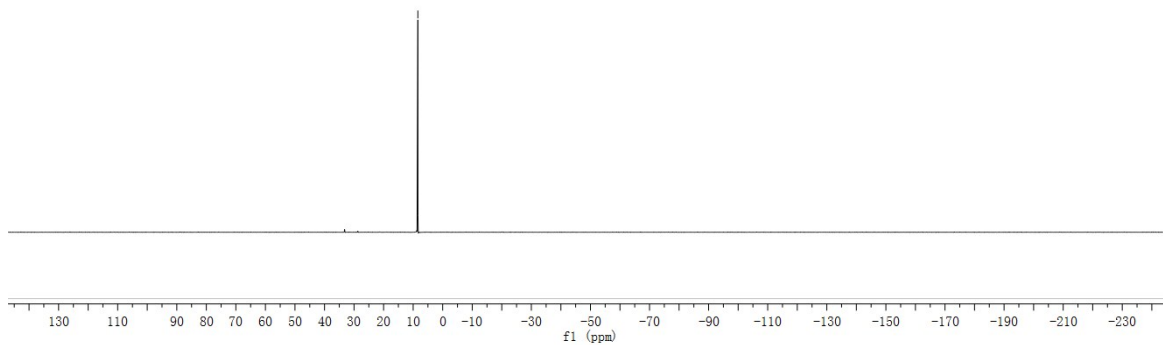

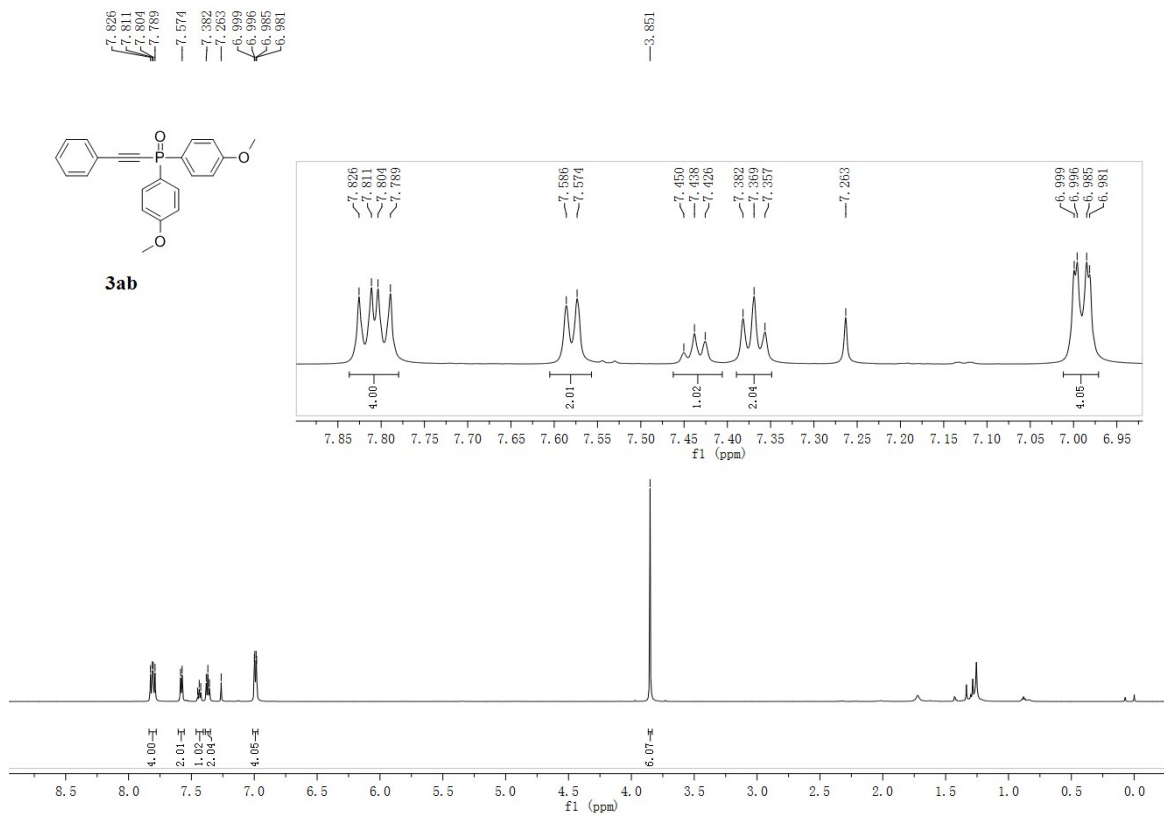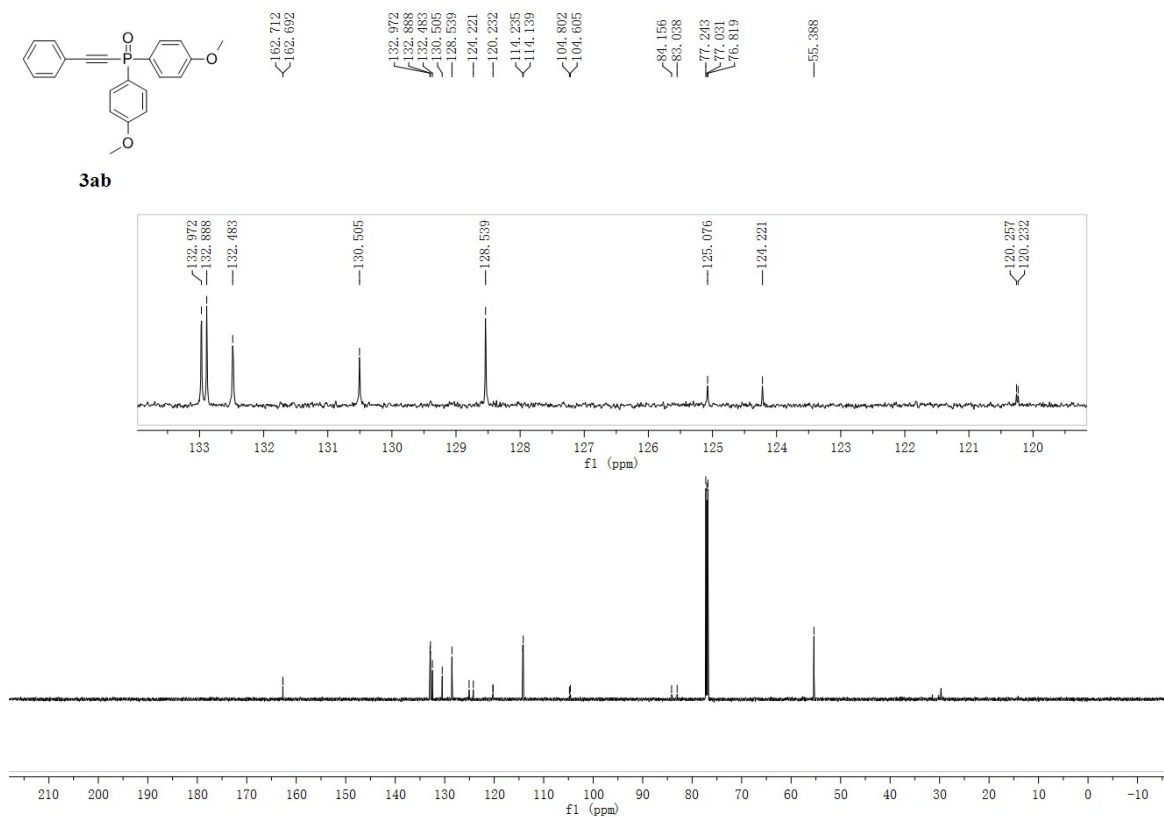

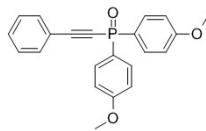

**3ab**

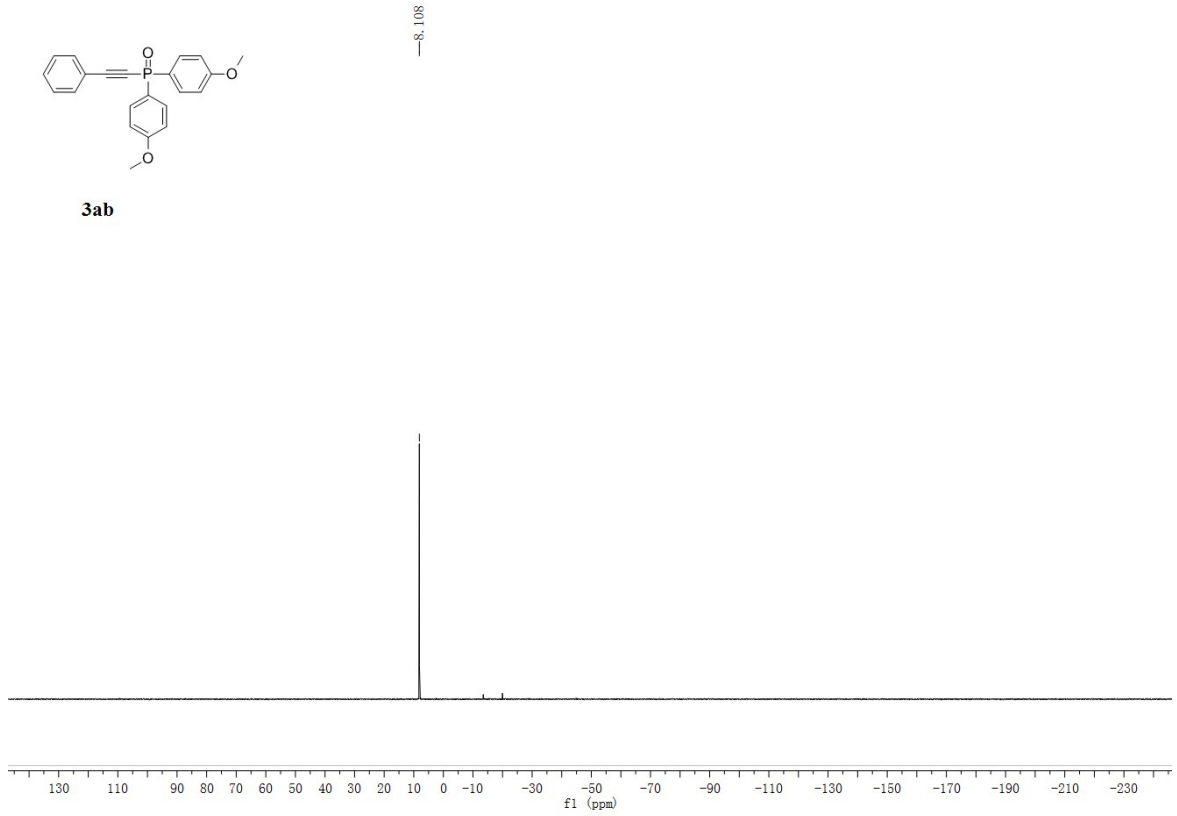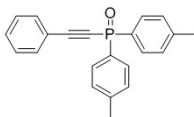

**3ac**

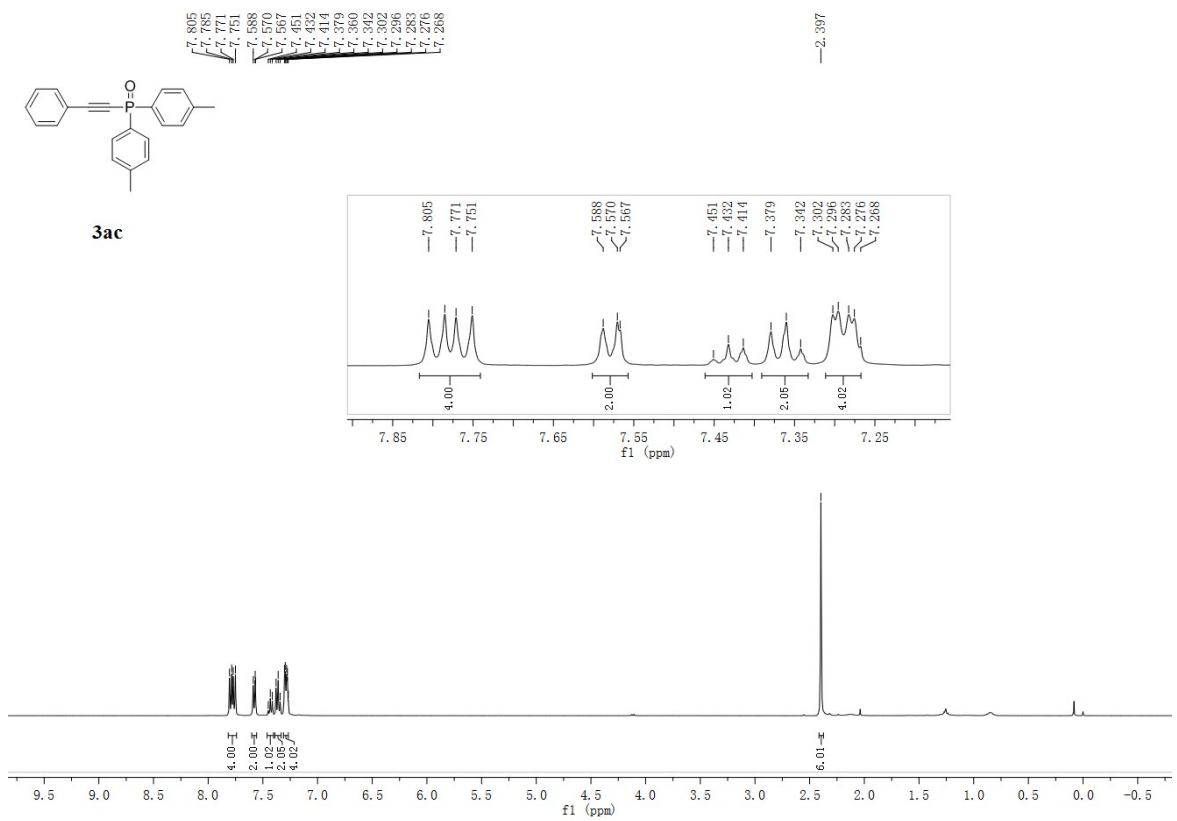

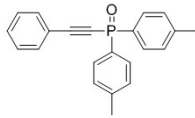

**3ac**

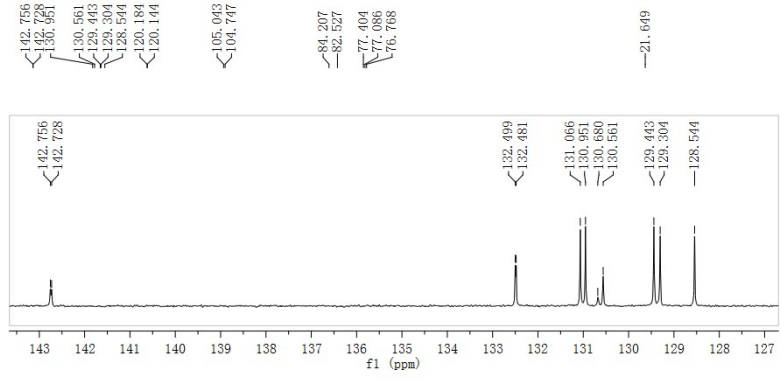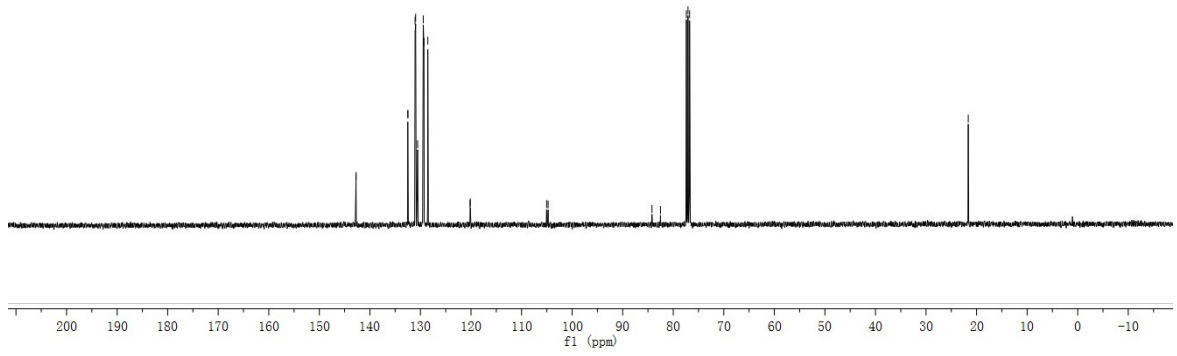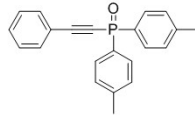

**3ac**

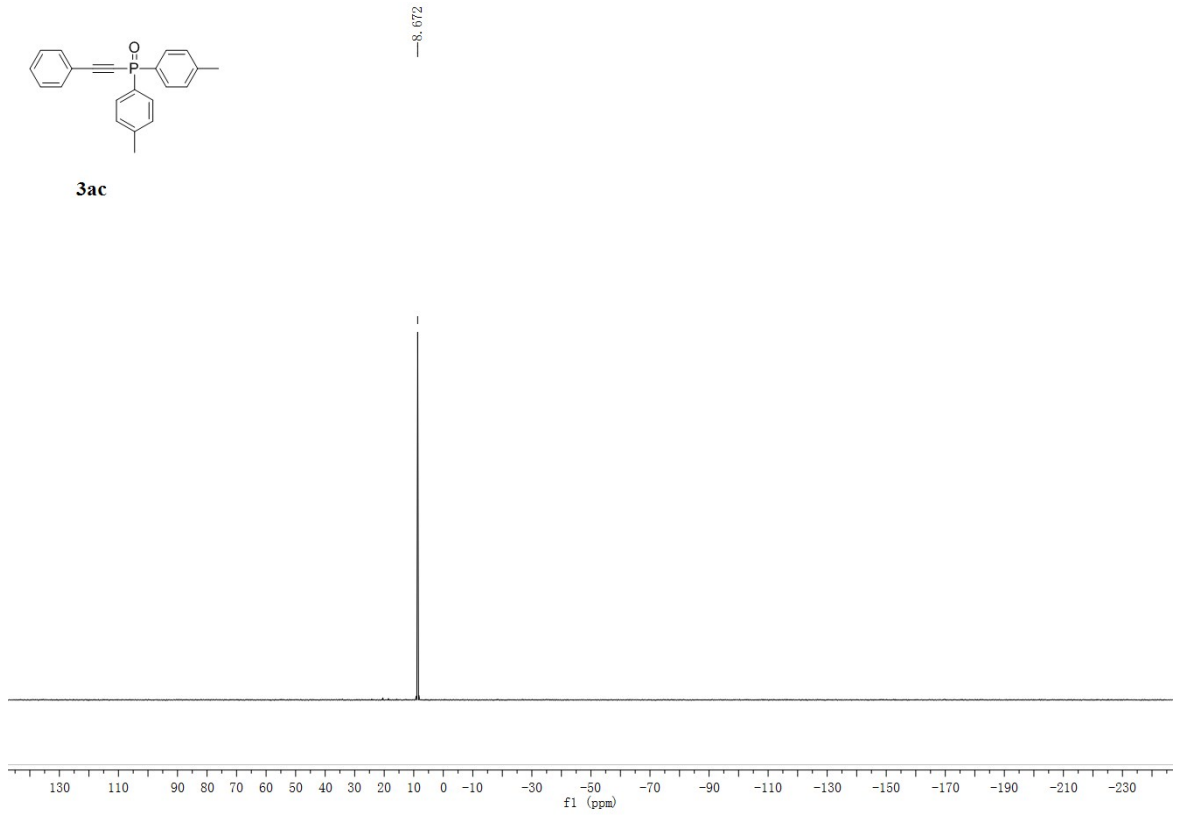



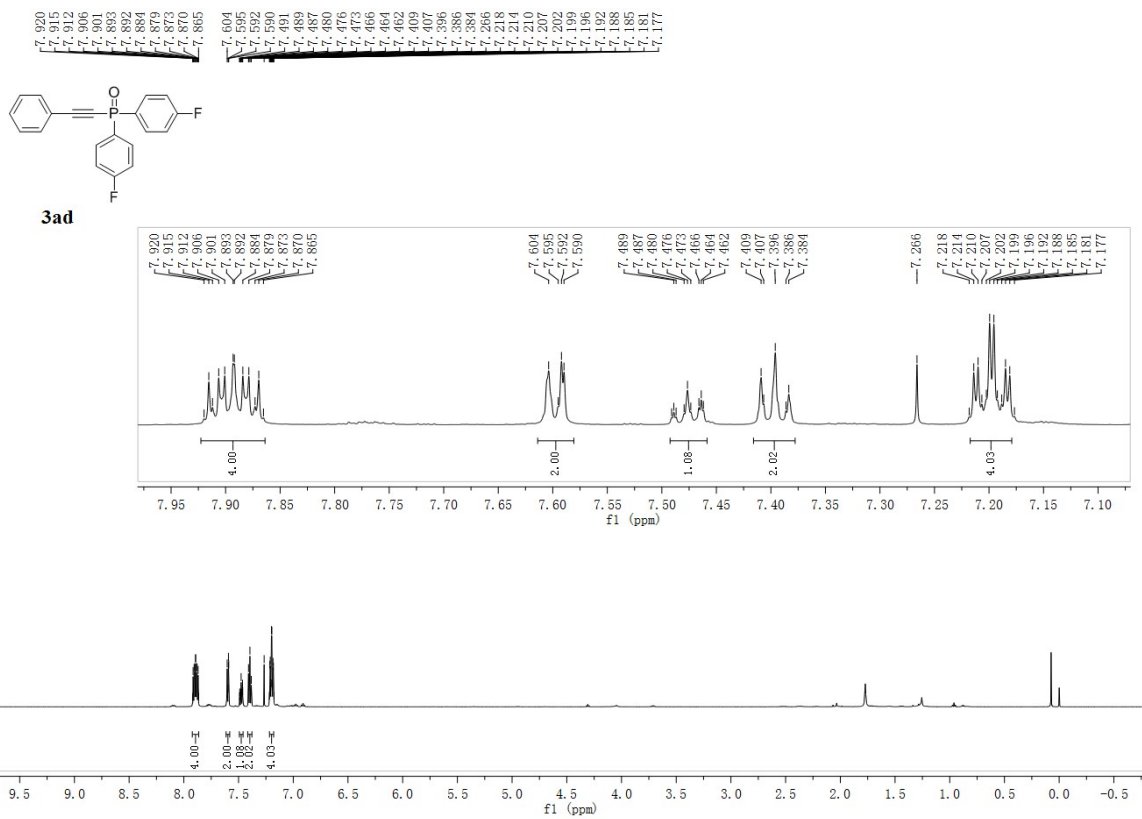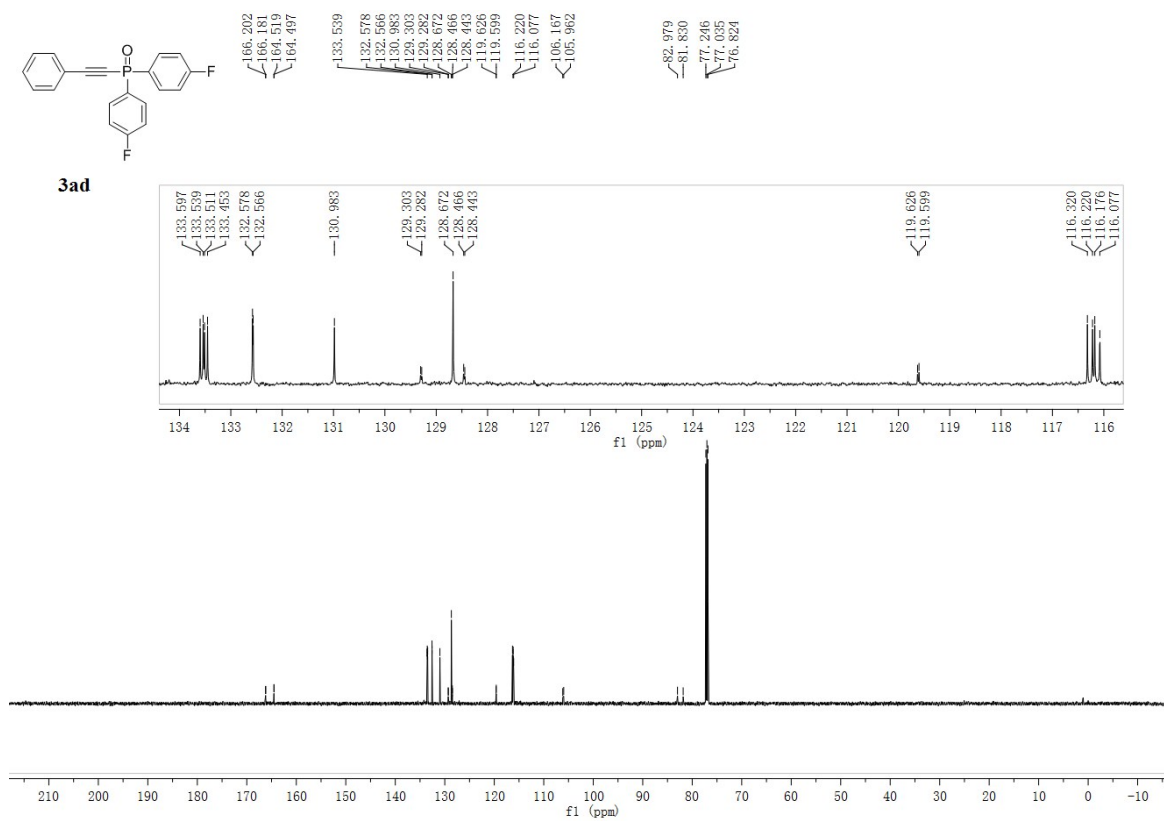

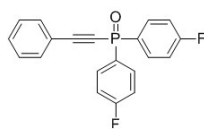

**3ad**

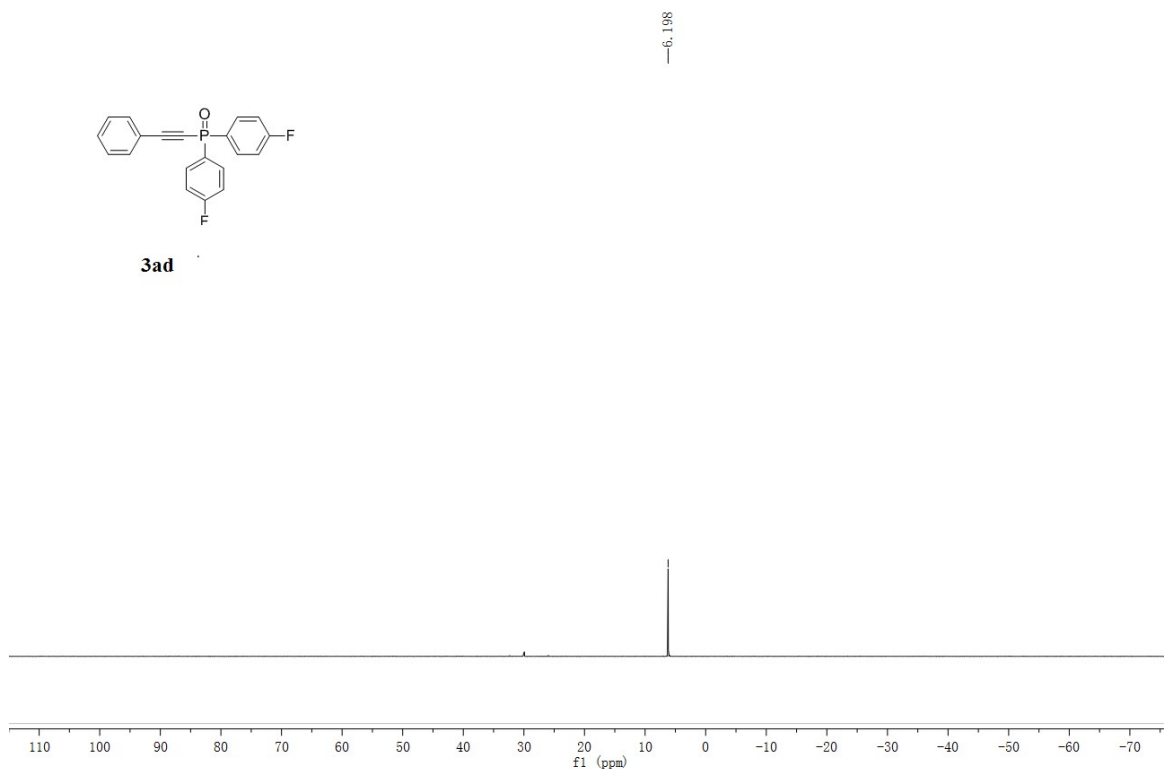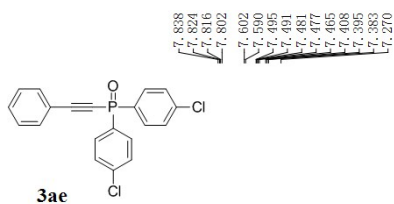

**3ae**

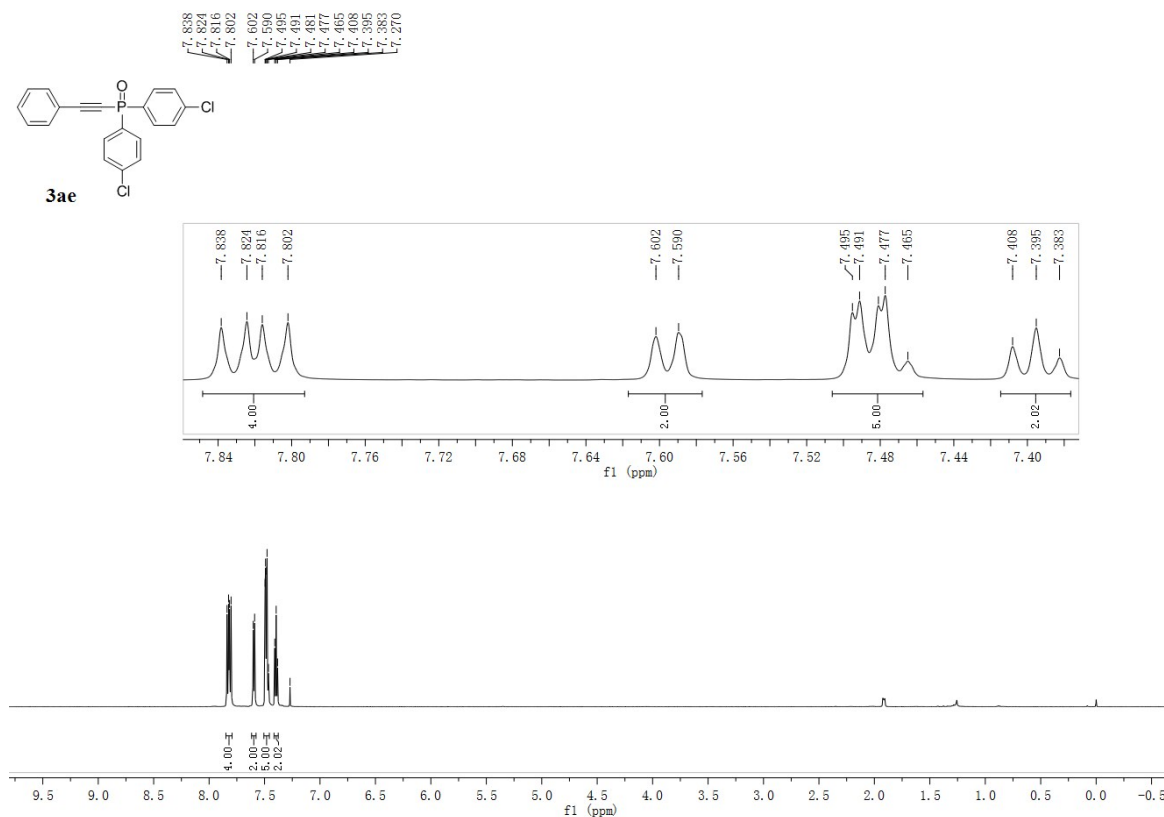

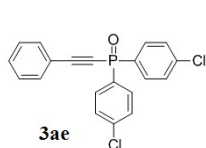

139.180  
 139.157  
 132.302  
 131.076  
 129.234  
 128.694  
 119.494  
 119.468  
 106.470  
 106.265

82.610  
 81.455  
 77.278  
 77.000  
 76.851

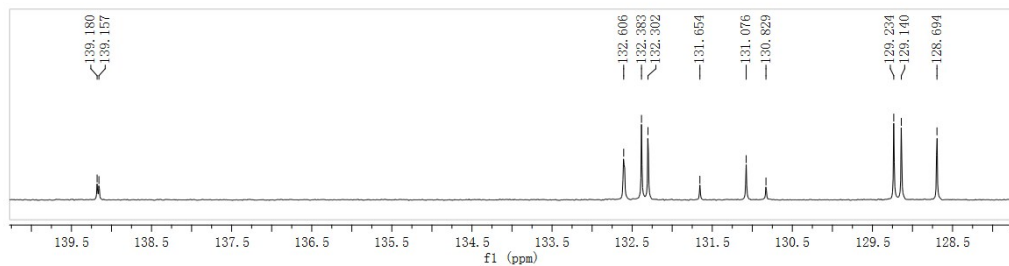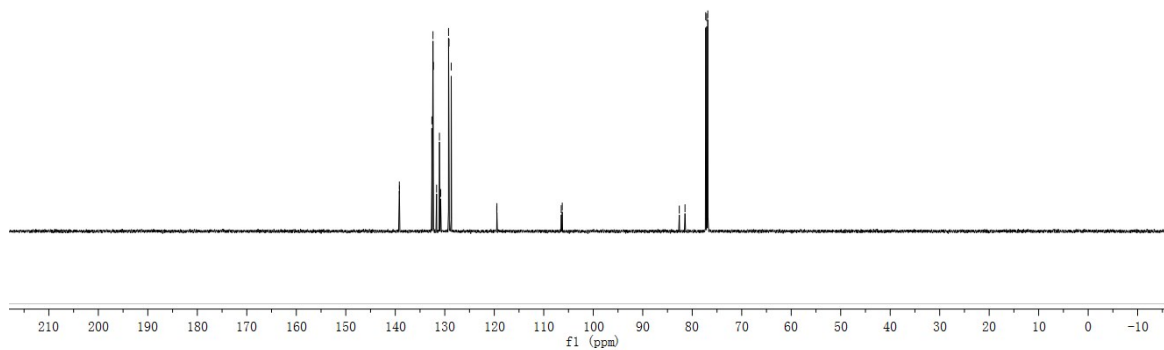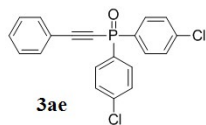

6.141

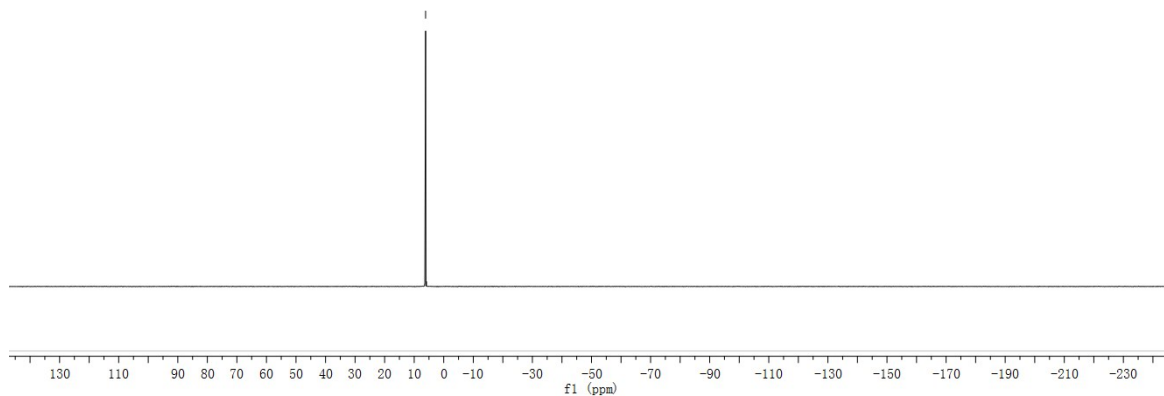

7.604  
7.587  
7.583  
7.468  
7.464  
7.446  
7.441  
7.427  
7.416  
7.408  
7.396  
7.377  
7.373  
7.270  
7.092  
7.087  
7.082  
7.068

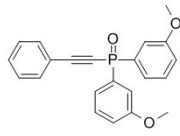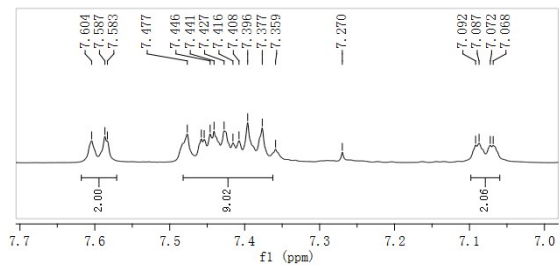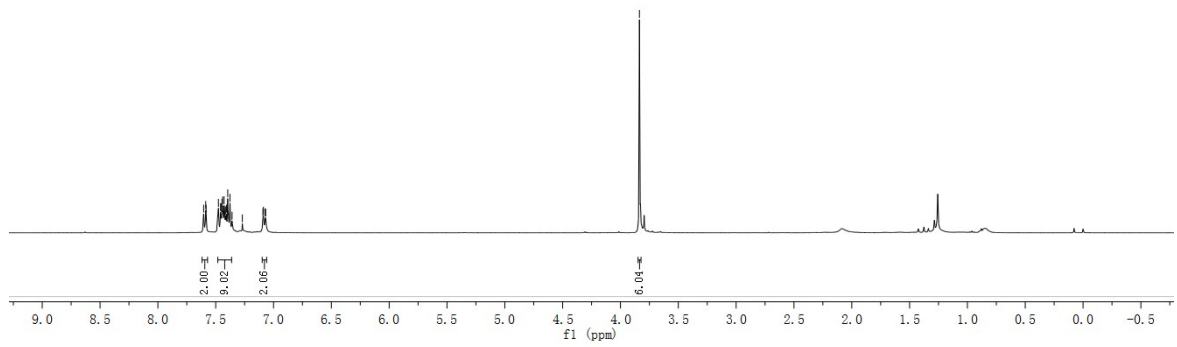

159.722  
159.555  
133.648  
132.552  
132.533  
130.735  
130.020  
129.861  
128.590  
123.142  
119.915  
118.476  
115.643  
105.573  
105.272  
83.636  
81.936  
77.369  
77.051  
76.733  
55.483

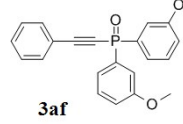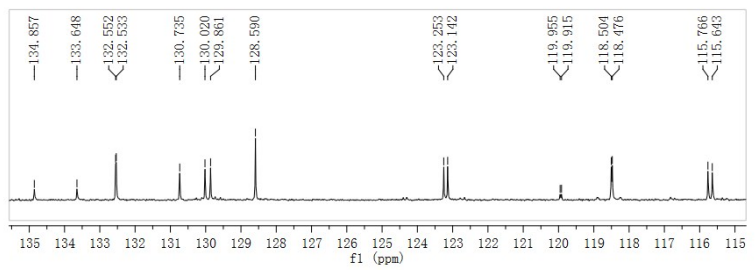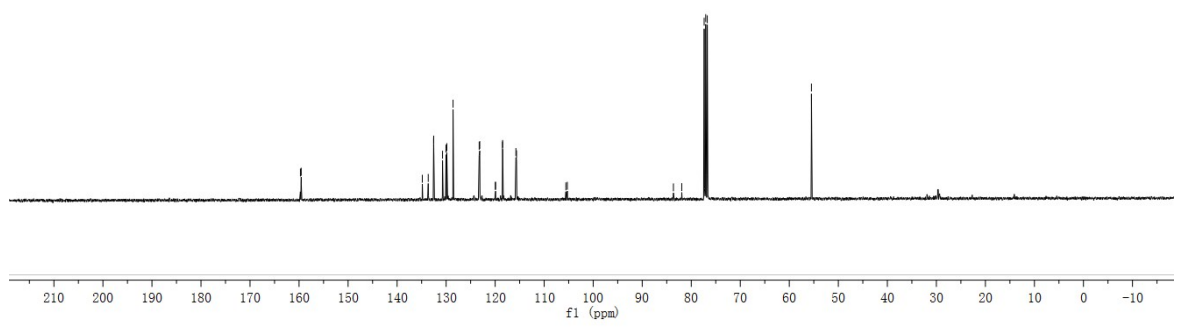

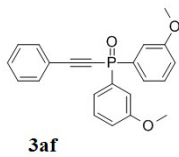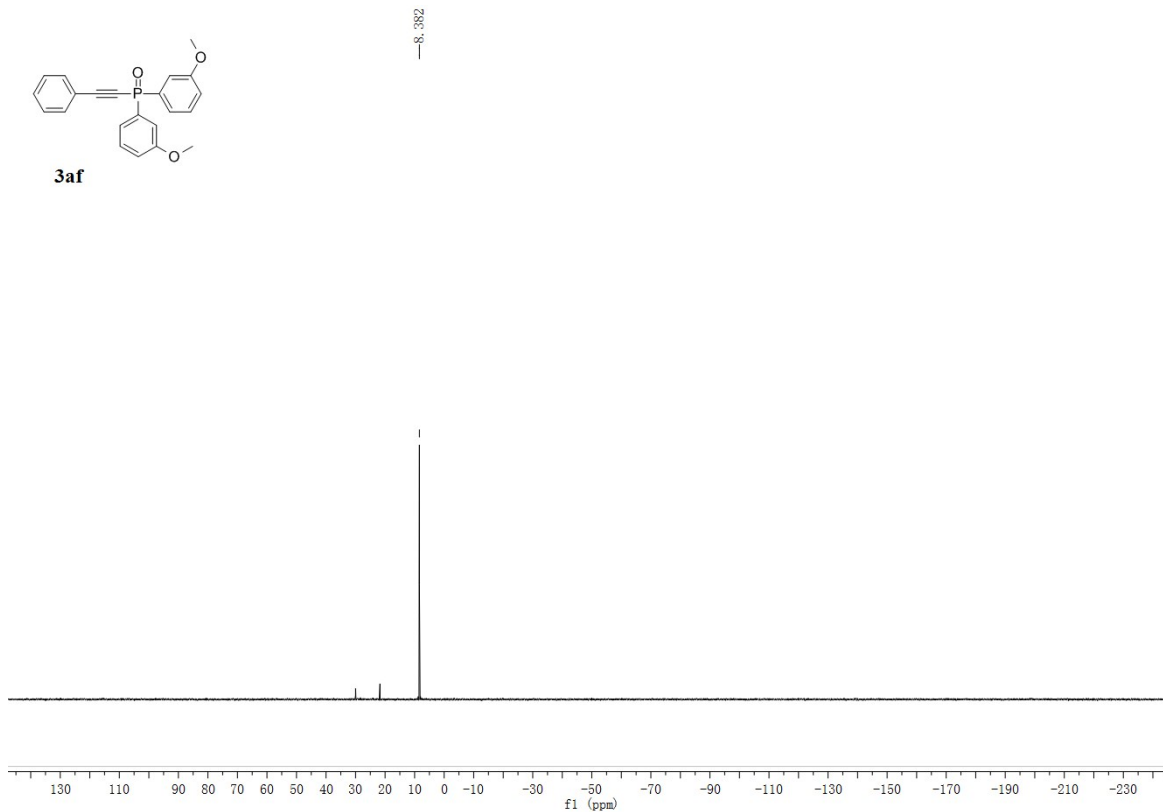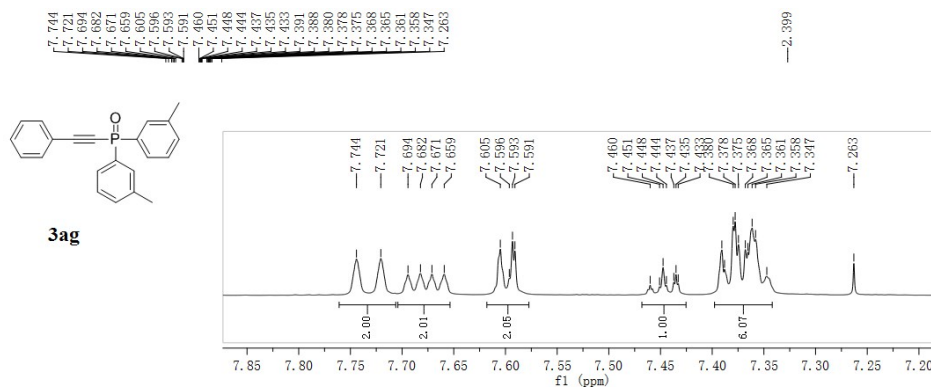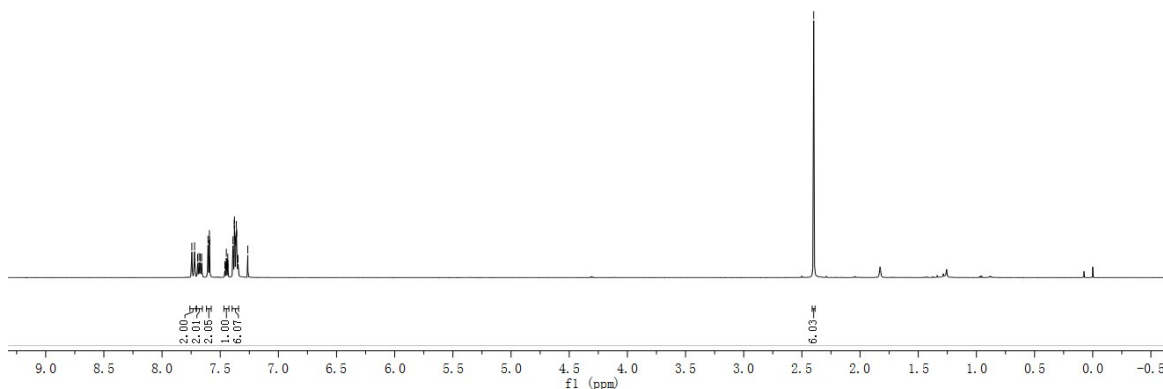

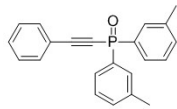

**3ag**

138.612  
138.523  
132.549  
130.629  
128.050  
120.143  
120.119  
105.240  
105.044  
83.709  
82.591  
77.262  
77.050  
76.839  
-21.455

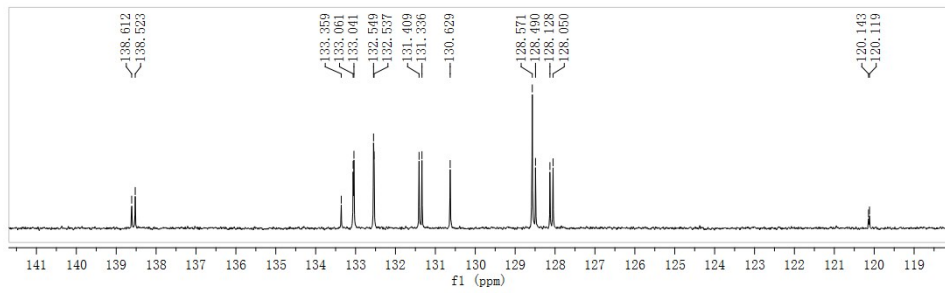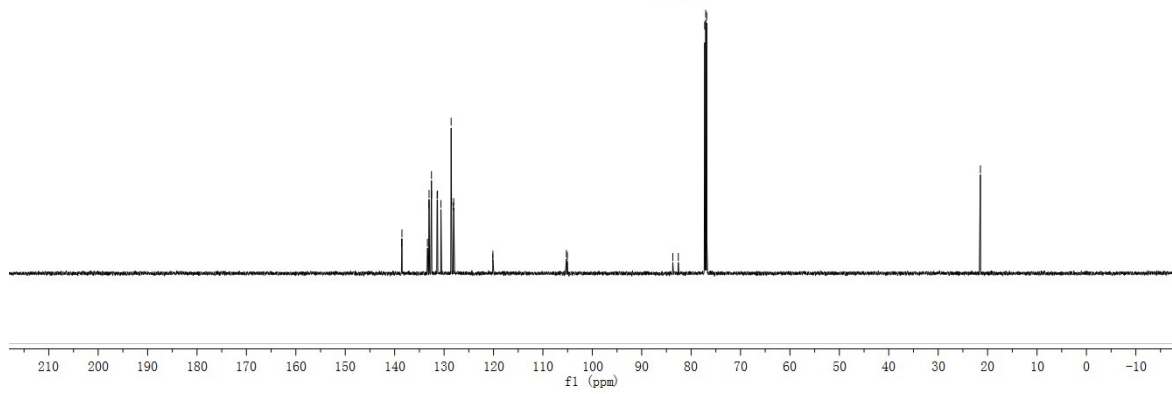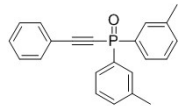

**3ag**

-8.698

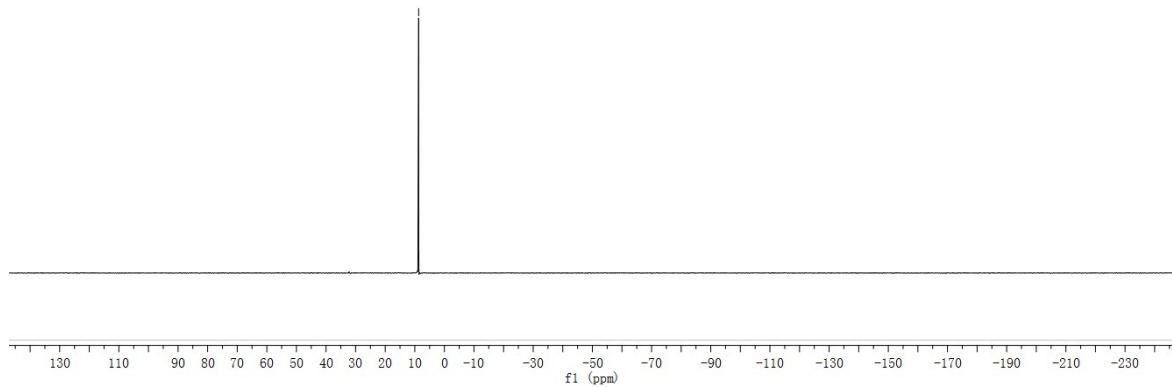

7.721  
7.702  
7.687  
7.688  
7.672  
7.603  
7.600  
7.597  
7.590  
7.587  
7.584  
7.569  
7.566  
7.563  
7.529  
7.519  
7.509  
7.494  
7.477  
7.428  
7.409  
7.390  
7.382  
7.368  
7.250

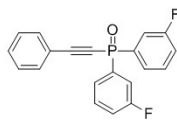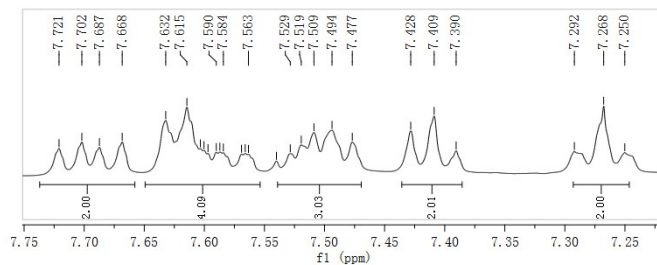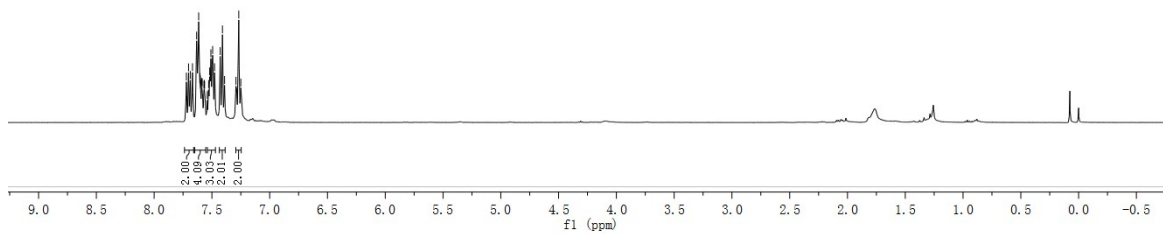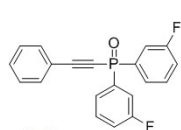

163.932  
163.742  
161.439  
161.248  
135.803  
134.586  
132.646  
130.977  
130.902  
130.745  
128.700  
126.692  
126.588  
119.853  
119.379  
117.881  
117.655  
106.696  
106.384

82.551  
80.805  
77.349  
77.032  
76.714

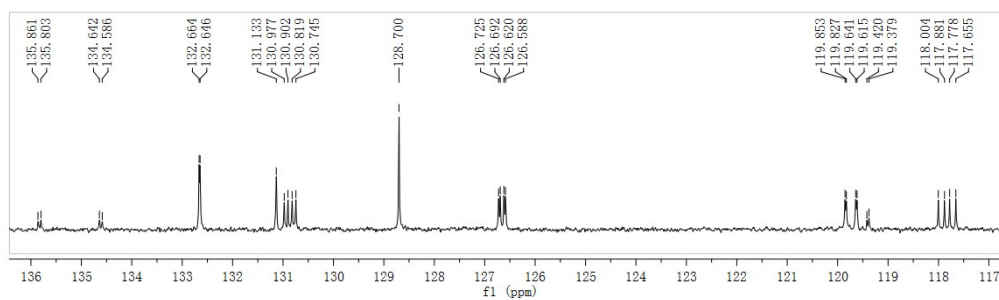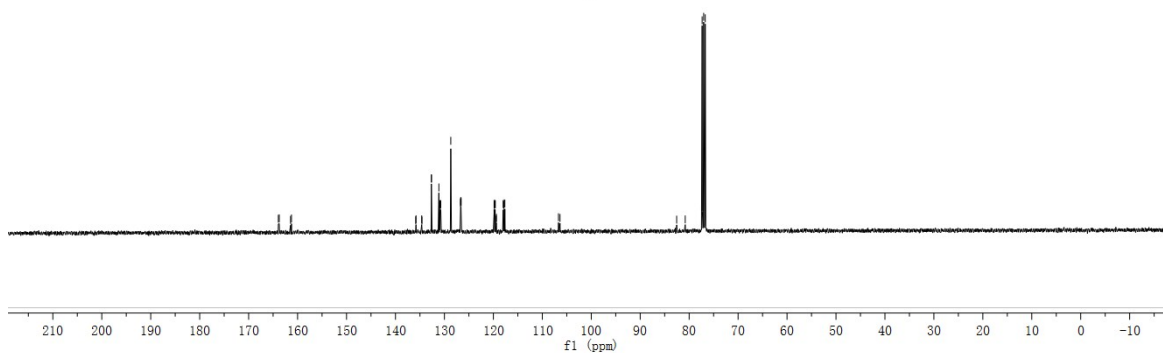

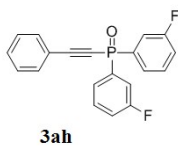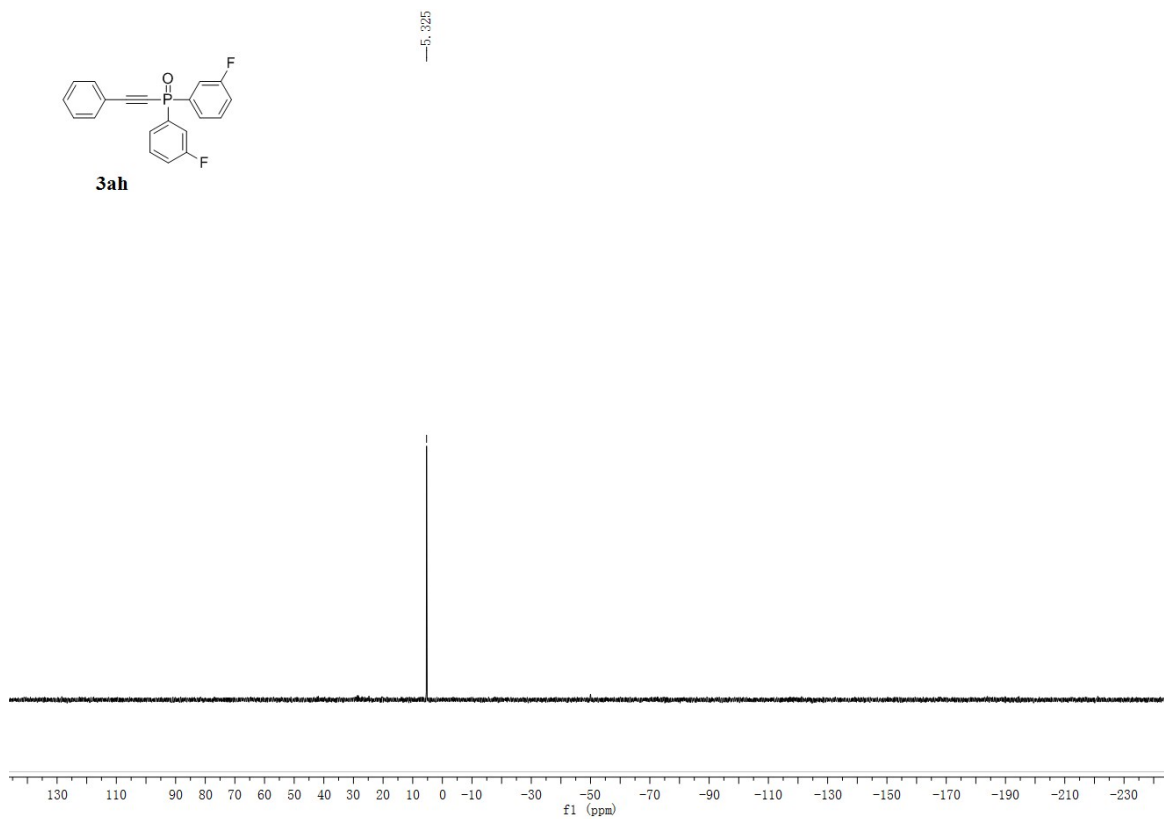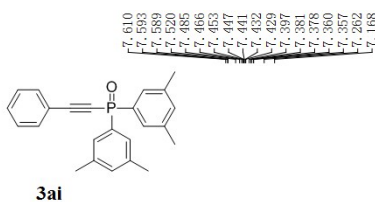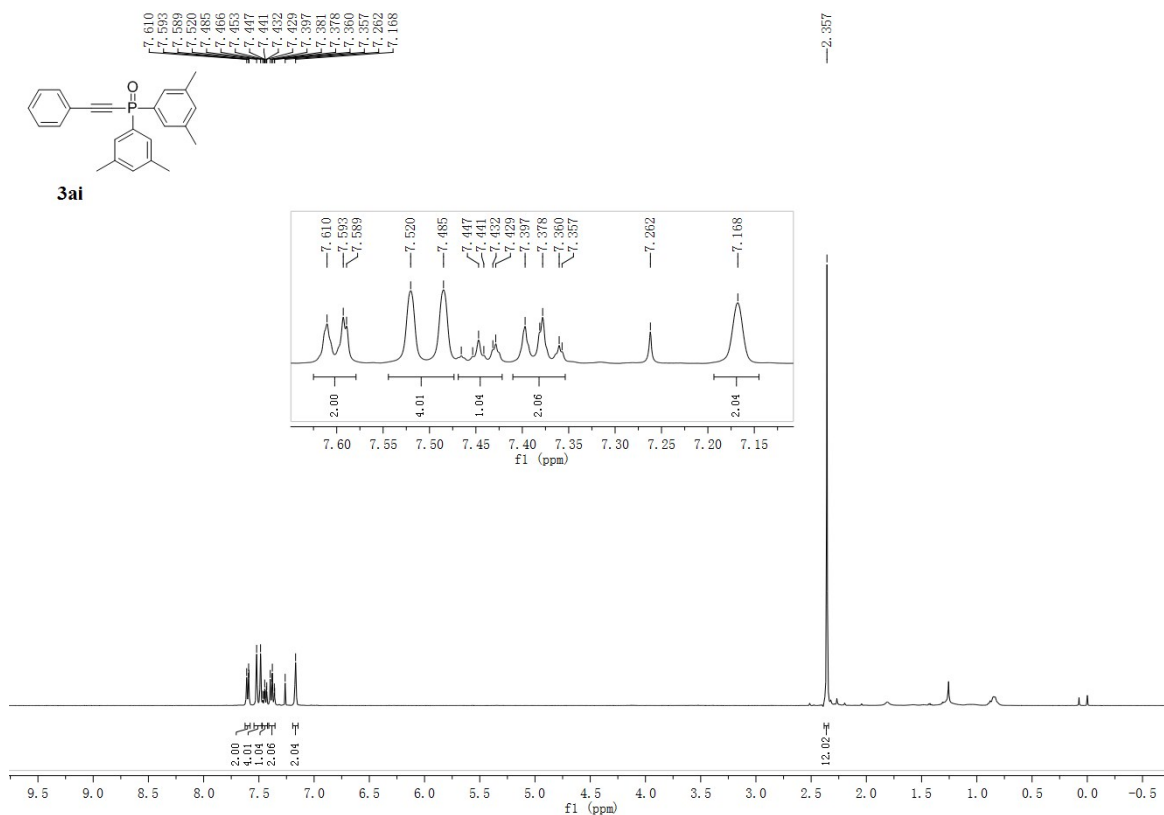



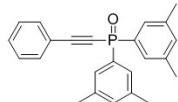

**3ai**

$\delta$  138.427  
 $\delta$  138.287  
 $\delta$  132.538  
 $\delta$  132.297  
 $\delta$  128.568  
 $\delta$  128.458  
 $\delta$  120.282  
 $\delta$  104.975  
 $\delta$  104.681  
 $\delta$  84.264  
 $\delta$  82.580  
 $\delta$  77.357  
 $\delta$  77.039  
 $\delta$  76.722  
 $\delta$  21.332

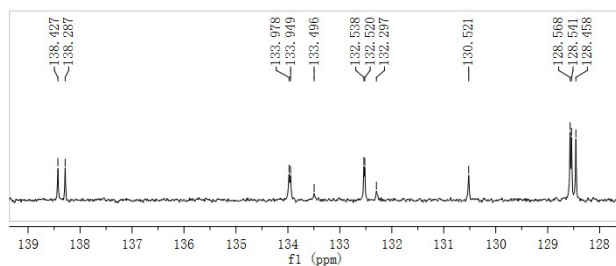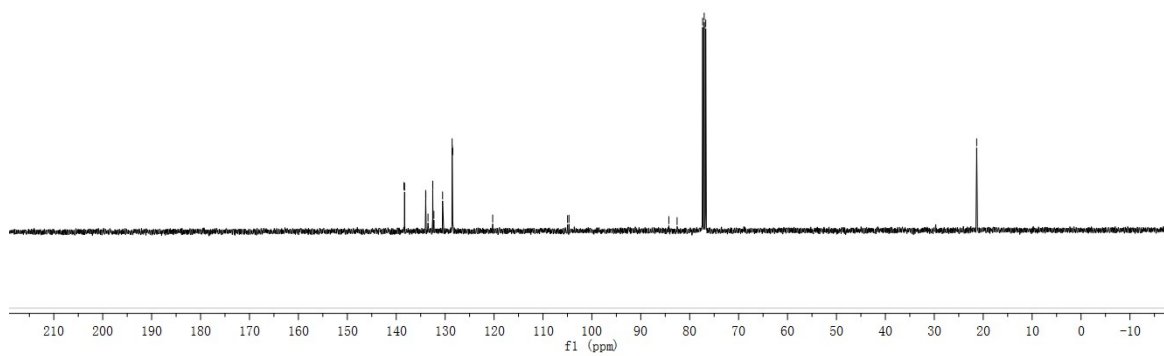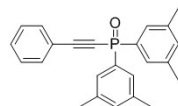

**3ai**

$\delta$  9.124

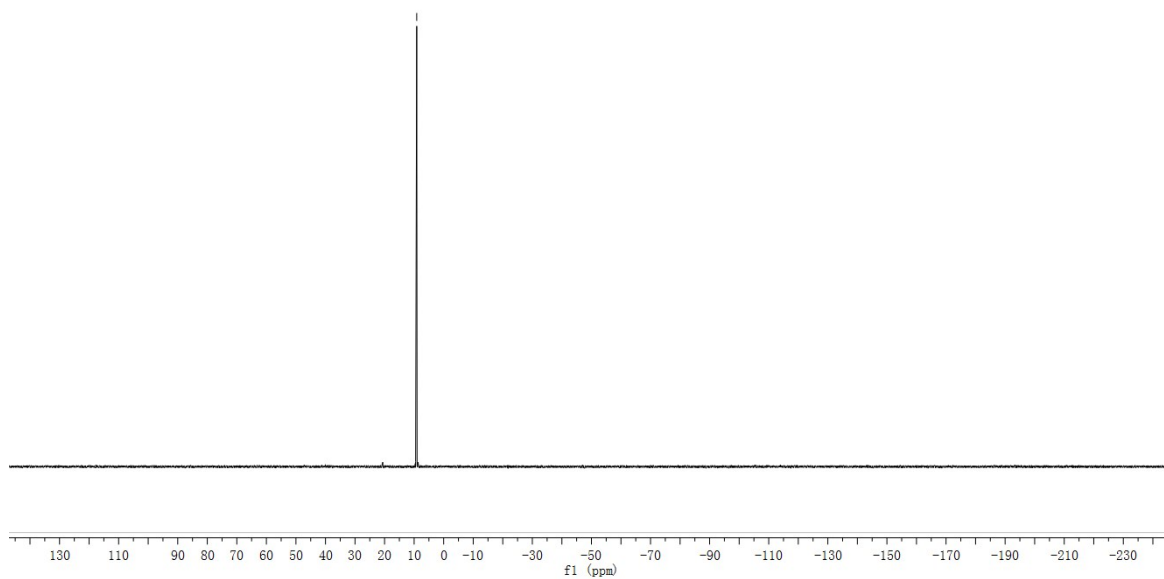



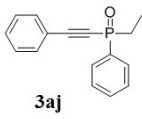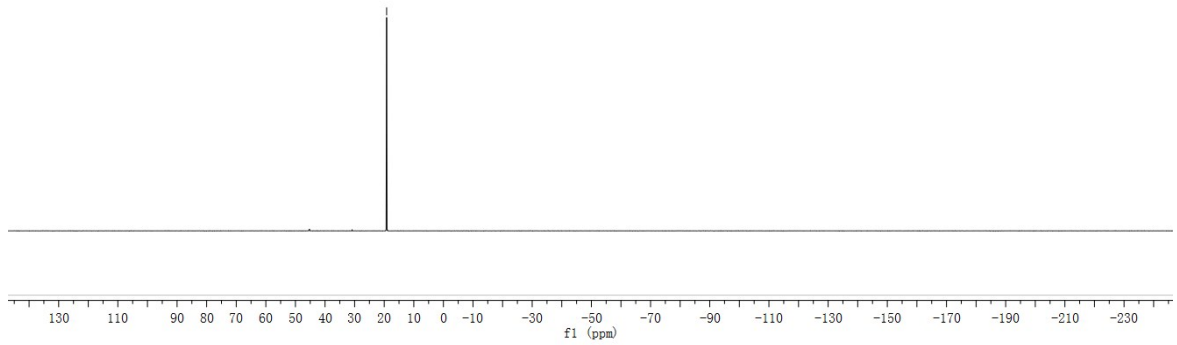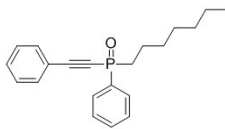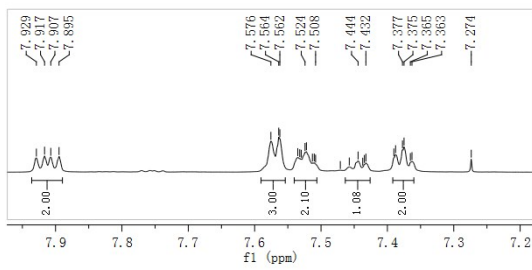

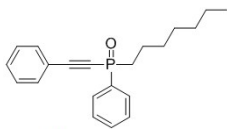

**3ak**

132.621  
132.482  
132.189  
132.174  
132.174  
132.174  
131.857  
130.884  
130.414  
128.734  
128.649  
128.558  
120.049  
103.889  
103.707  
83.360  
82.319  
77.276  
77.065  
76.852  
34.160  
33.604  
31.539  
30.637  
30.531  
28.734  
22.555  
21.873  
21.896  
14.030

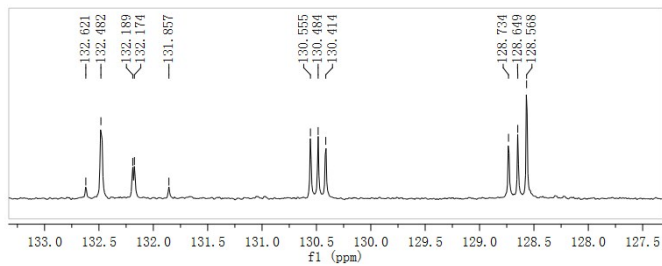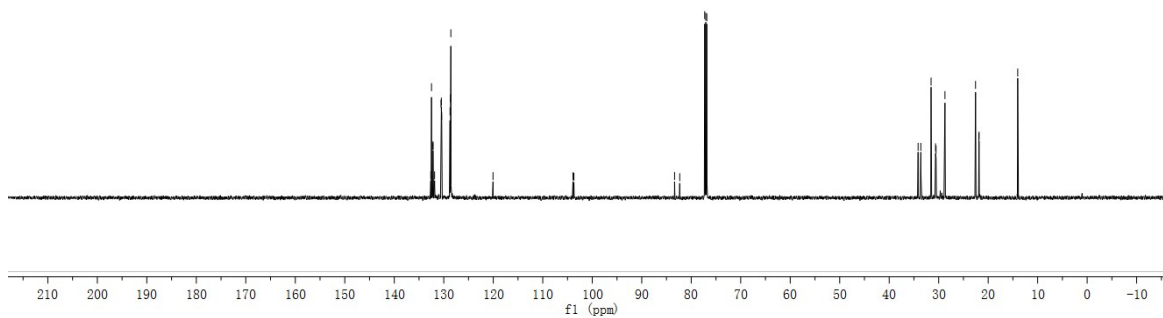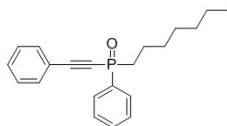

**3ak**

17.120

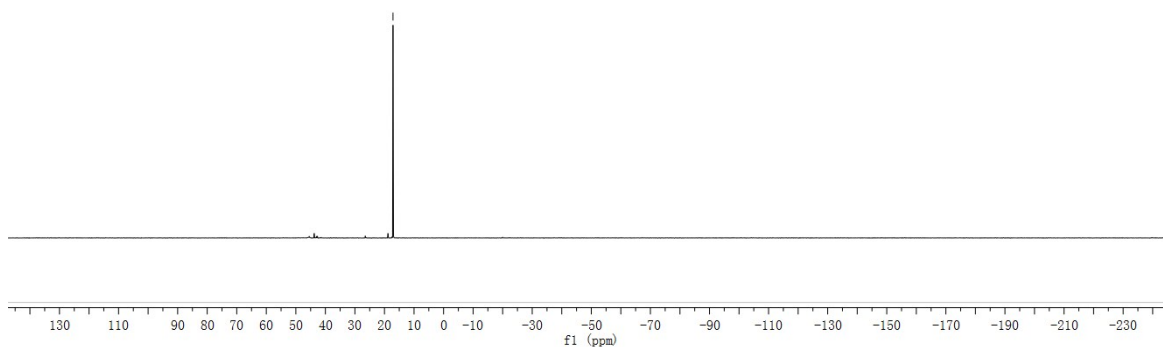

Supplement: c9ob02750e1.pdf [file c9ob02750e1.pdf]
